# Supplementary material
Source: MDPI journal article supplement (https://www.mdpi.com/2073-4395/11/12/2519)
Supplement: s1 [file s1 › Supplementary tables.xlsx]

## Sheet: Table S1
Table S1. Analysis of variance, heritability and mean performance.
Variable name	Abbreviation	Units	TAM 111	CO960293-2	Differences	LSD	Min	Max	Mean	SD	σ2Gena	σ2Env/Repb	σ2Resc	Hd
Midline left time	MLT	min	1.82	4.93	-3.11	2.17	0.5	7	3.67	1.74	1.61****	1.05****	0.72	0.87
Midline left value	MLV	%	51.55	47.94	3.61	11.75	23.53	101.11	49.82	7.41	7.87****	13.87****	38.13	0.38
Midline left slope	MLS	% min-1	13.03	3.8	9.23	9.57	-6.14	42.72	8.53	6.89	18.78****	16.59****	17.88	0.76
Midline left width	MLW	%	41.79	30.56	11.23	14.47	8.86	61.77	31.67	9.1	14.58****	31.00****	47.91	0.47
Midline left integral	MLI	%TQ × min	65.44	173.39	-107.95	63.64	15.09	278.78	122.78	55.86	1814.31****	651.05****	875.03	0.86
Midline peak time	MPT	min	2.82	5.93	-3.11	2.17	1.5	8	4.67	1.74	1.61****	1.05****	0.72	0.87
Midline peak value	MPV	%	59.4	50.34	9.06	13.9	24.01	101.7	54.56	8.56	12.67****	34.82****	38.01	0.5
Midline peak width	MPW	%	30.61	23.57	7.04	9.61	7.57	46.94	24.07	6.26	6.48****	5.57****	29.27	0.4
Midline peak integral	MPI	%TQ × min	122.16	222.9	-100.74	62.36	61.63	341.37	175.68	54.49	1657.68****	454.85****	1010.39	0.83
Midline right time	MRT	min	4.16	6	-1.84	2.01	2.5	8	6.36	1.29	0.85****	0.45****	0.69	0.79
Midline right value	MRV	%	54	50.42	3.58	8.82	35.27	96.83	52.02	4.87	2.94**	2.79****	19.28	0.31
Midline right slope	MRS	% min-1	-3.34	-2.8	-0.54	3.77	-10.27	13.35	-3.17	2.04	1.17****	1.78****	2.24	0.61
Midline right width	MRW	%	16.16	16.79	-0.63	9.1	3.78	38.25	15.06	5.37	9.55****	7.54****	15.91	0.64
Midline right integral	MRI	%TQ × min	198.96	245.53	-46.57	90.95	110.46	539.08	234.12	55.39	1158.58****	709.66****	1634.14	0.68
Midline tail value	MTV	%	45.22	46.52	-1.3	8.66	23.94	85.47	46.29	5.66	4.43***	1.60****	26.7	0.33
Midline tail slope	MTS	% min-1	-0.4	-0.95	0.55	2.1	-6.53	6.55	-0.67	1.24	0	0.18****	1.48	0
Midline tail width	MTW	%	9.62	12.16	-2.54	8.8	2.34	46.94	11.99	6.6	18.85****	13.34****	15.84	0.78
Midline tail integral	MTI	%TQ × min	385.86	325.62	60.24	85.85	160.75	694.48	343.17	55.7	692.16****	1074.02****	1702.73	0.55
Midline time _X value	MTXV	%	45.26	46.57	-1.31	8.7	23.95	85.65	46.33	5.68	4.41***	1.64****	26.87	0.33
Midline time_X slope¶	MTXS	% min-1	0.22	-0.14	0.36	1.37	-5.41	14.96	-0.09	0.85	0.02	0.01	0.7	0.08
Midline time _X width	MTXW	%	9.62	12.16	-2.54	8.8	2.34	46.94	11.99	6.6	18.85****	13.34****	15.84	0.78
Midline time _X integral	MTXI	%TQ × min	385.86	325.62	60.24	85.85	160.75	694.48	343.17	55.7	692.16****	1074.02****	1702.73	0.55
Midline mixing stability or tolerance	MMST	%	47.56	34	13.56	24.82	3.42	114.53	39.14	16.06	61.27****	104.07****	128.07	0.59
Hardness index	HDI	%	61.13	78.33	-17.2	10.23	48.9	85.9	68.66	6.55	10.40****	21.40****	18.02	0.63
Single kernel weight	SKW	mg	29.77	29.5	0.27	7.56	20.4	41.7	28.65	4.26	3.06****	19.04****	2.51	0.78
Flour protein concentration	FPC	%	13.11	13.31	-0.2	1.19	10.09	15.55	13	0.76	0.11****	0.19****	0.35	0.49
Water absorption	WAB	%	60.88	61.18	-0.3	4.64	56.16	66.73	61	2.42	0.18***	7.12****	0.99	0.35
Kernel diameter	KD	mm	2.57	2.6	-0.03	0.28	2.2	3	2.54	0.15	0.003****	0.03****	0.004	0.69
Grain Mg concentration	GMG	mg kg-1	1600.22	1810.82	-210.6	1120.7	808.86	3110.95	1852.42	480.84	0	0	279515	0
Grain Na concentration	GNA	mg kg-1	9.33	12.22	-2.89	10.43	4.46	64.94	13.93	4.89	0	0	27.43	0
Grain P concentration	GP	mg kg-1	4501.17	4828.88	-327.71	3723.4	1900.42	9426.8	4932.38	1545.78	0	0	2839340	0
Grain S concentration	GS	mg kg-1	1895.5	2051.9	-156.4	1434.9	804.49	3897.25	2108.76	588.86	0	0	419367	0
Grain K concentration	GK	mg kg-1	4367.03	5166.98	-799.95	2835.3	2204.69	9535.7	5264.47	1256.52	0	0	1881746	0
Grain Ca concentration	GCA	mg kg-1	158.58	183.98	-25.4	164.31	75.07	364.97	187.66	65.78	0	0	6451.23	0
Grain Mn concentration	GMN	mg kg-1	49.16	40.44	8.72	16.99	25.22	74	45.02	8.13	0	0	73.36	0
Grain Fe concentration	GFE	mg kg-1	45.34	48.38	-3.04	15.4	24.55	79.1	46.07	7.94	2.82	0	59.55	0.08
Grain Cu concentration	GCU	mg kg-1	5.15	5.33	-0.18	2.22	2.79	11.15	5.61	1.05	0	0	1.15	0
Grain Zn concentration	GZN	mg kg-1	42.05	49.41	-7.36	15.75	25.88	84.81	44.33	8.03	0.99	0	63.41	0.03
Grain Rb concentration	GRB	mg kg-1	2.74	2.84	-0.1	0.86	1.62	5.21	2.68	0.42	0	0	0.19	0
Grain Sr concentration	GSR	mg kg-1	8.35	8.58	-0.23	2.31	4.58	13.37	8.14	1.19	0.06	0	1.36	0.08
Grain Mo concentration	GMO	mg kg-1	0.56	0.86	-0.3	0.28	0.47	1.49	0.78	0.15	0.01***	0	0.02	0.29
Grain Cd concentration	GCD	mg kg-1	0.12	0.1	0.02	0.04	0.06	0.24	0.11	0.02	1.80E-4****	0	0.000398	0.47
Grain As concentration	GAS	mg kg-1	0.01	0.01	0	0.0074	0.0045	0.03	0.01	0.00395	2.14E-6*	0	1.3e-05	0.25
Grain Ni concentration	GNI	mg kg-1	0.65	0.45	0.2	0.34	0.21	1.45	0.59	0.19	0.01**	0	0.03	0.28
Grain Co concentration	GCO	mg kg-1	0.04	0.03	0.01	0.02	0.01	0.12	0.04	0.01	3.50E-5***	0	0.000114	0.38
Grain Li concentration	GLI	mg kg-1	0.05	0.06	-0.01	0.04	0.02	0.15	0.06	0.02	0	0	0.000496	0
Grain Ti concentration	GTI	mg kg-1	0.36	0.33	0.03	0.17	0.23	0.86	0.39	0.09	0.000854	0	0.01	0.18
LSD, least significant difference, p=0.05; SD, standard deviation.
a σ2Gen, genotypic variance.
b σ2Env/Rep, environment variance for traits except grain mineral element concentrations and replication variance for grain mineral element concentrations traits.
c σ2Res, residual variance.
d H, entry-mean broad-sense heritability.

## Sheet: Table S2
Table 2. Correlation matrix for kernel characteristics and rheological properties for data averaged across environments.
Variable†	MLT	MLV	MLS	MLW	MLI	MPT	MPV	MPW	MPI	MRT	MRV	MRS	MRW	MRI	MTV	MTS	MTW	MTI	MTXV	MTXS	MTXW	MTXI	MMST	HDI	KD	SKW	FPC
MLV	-0.33****
MLS	-0.68****	0.17****
MLW	-0.43****	0.64****	0.37****
MLI	0.92****	-0.03	-0.72****	-0.22****
MPT	1.00****	-0.33****	-0.68****	-0.43****	0.92****
MPV	-0.55****	0.89****	0.56****	0.70****	-0.32****	-0.55****
MPW	-0.15***	0.39****	0.21****	0.70****	0.02	-0.15***	0.44****
MPI	0.87****	0.11**	-0.67****	-0.13**	0.99****	0.87****	-0.18****	0.08*
MRT	0.93****	0.17***	-0.54****	-0.18****	0.84****	0.93****	-0.13**	-0.10*	0.83****
MRV	-0.12**	0.82****	0.12**	0.61****	0.12**	-0.12**	0.76****	0.58****	0.23****	-0.12**
MRS	0.58****	-0.23****	-0.59****	-0.21****	0.53****	0.58****	-0.51****	-0.02	0.47****	0.46****	-0.24****
MRW	0.40****	0.11*	-0.49****	0.22****	0.51****	0.40****	-0.16***	0.49****	0.50****	0.22****	0.33****	0.58****
MRI	0.73****	0.61****	-0.37****	0.12**	0.79****	0.73****	0.35****	0.10*	0.85****	0.85****	0.33****	0.22****	0.22****
MTV	0.10**	0.79****	-0.10*	0.50****	0.40****	0.10**	0.63****	0.51****	0.51****	0.45****	0.79****	0.18****	0.54****	0.74****
MTS	0.36****	-0.46****	-0.16****	-0.32****	0.22****	0.36****	-0.44****	-0.04	0.16****	-0.26****	-0.27****	0.12**	0.01	-0.37****	-0.27****
MTW	0.78****	-0.10*	-0.50****	-0.13***	0.83****	0.78****	-0.26****	0.23****	0.81****	0.66****	0.19****	0.56****	0.64****	0.65****	0.38****	0.36****
MTI	-0.69****	0.86****	0.41****	0.70****	-0.39****	-0.69****	0.89****	0.45****	-0.26****	-0.30****	0.90****	-0.37****	0.12**	0.23****	0.57***	-0.48****	-0.36****
MTXV	0.10*	0.79****	-0.10*	0.51****	0.39****	0.10*	0.63****	0.51****	0.51****	0.45****	0.79****	0.18****	0.54****	0.74****	0.99****	-0.28****	0.37****	0.58****
MTXS	0.05	-0.12**	-0.07	-0.10*	0.02	0.05	-0.13***	0.02	0.01	-0.05	-0.27****	0.06	0.03	-0.06	-0.14***	0.30****	0.06	-0.10*	-0.13**
MTXW	0.78****	-0.09*	-0.50****	-0.13**	0.83****	0.78****	-0.26****	0.23****	0.81****	0.66****	0.19****	0.56****	0.64****	0.65****	0.38****	0.36****	1.00****	-0.36****	0.37****	0.06
MTXI	-0.69****	0.86****	0.40****	0.70****	-0.39****	-0.69****	0.89****	0.45****	-0.26****	-0.30****	0.90****	-0.37****	0.12**	0.23****	0.57****	-0.48****	-0.36****	1.00****	0.58****	-0.10*	-0.36****
MMST	-0.63****	0.44****	0.65****	0.61****	-0.53****	-0.63****	0.66****	0.40****	-0.45****	-0.44****	0.37****	-0.51****	-0.25****	-0.19****	0.14***	-0.26****	-0.45****	0.61****	0.15****	-0.07	-0.45****	0.61****
HDI	0.20****	0.08	-0.08	0.04	0.18****	0.20****	0.04	0.04	0.19****	0.21****	0.14***	0.04	0.02	0.27****	0.14***	-0.03	0.19****	-0.04****	0.14***	-0.02	0.19****	-0.04	-0.02
KD	-0.40****	0.18****	0.24****	0.26****	-0.31****	-0.40****	0.24****	0.11**	-0.29****	-0.22****	-0.01	-0.18****	-0.13**	-0.19****	-0.02	-0.18****	-0.38****	0.32****	-0.02	-0.06	-0.38****	0.32****	0.31****	-0.32****
SKW	0.36****	0.16****	0.19****	0.24****	-0.27****	-0.36****	0.21****	0.12**	-0.25****	-0.18****	-0.01	-0.14**	-0.08	-0.17****	-0.01	-0.15***	-0.34****	0.30****	-0.01	-0.05	-0.34****	0.30****	0.27****	-0.39****	0.95****
FPC	0.06	0.12**	0.03	0.05	0.08*	0.06	0.11**	0.10*	0.10*	0.04	0.21****	0.02	0.12**	0.11*	0.18****	0.03	0.15***	0.08	0.18****	-0.01	0.15***	0.08	0.08	0.20****	-0.40****	-0.39****
WAB	0.35****	-0.10*	-0.18****	-0.19****	0.27****	0.35****	-0.15***	-0.05	0.26****	0.22****	0.08	0.12**	0.11*	0.22****	0.08*	0.16****	0.36****	-0.25****	0.08*	-0.05	0.36****	-0.25****	-0.20****	0.41****	-0.75****	-0.74****	0.73****
†MLT, midline left time; MLV, midline left value; MLS, midline left slope; MLW, midline left width; MLI, midline left integral; MPT, midline peak time; MPV, midline peak value; MPW, midline peak width; MPI, midline peak integral; MRT, midline right time; MRV, midline right value; MRS, midline right slope; MRW, midline right width; MRI, midline right integral; MTV, midline trail value; MTS, midlin…
*, **,***, ****, significant at 0.05, 0.01, 0.001, and 0.0001 probability levels, respectively.

## Sheet: Table S3
Table S3. Correlation matrix for kernel characteristics and rheological properties for environment BS14.
Variablea	MLT	MLV	MLS	MLW	MLI	MPT	MPV	MPW	MPI	MRT	MRV	MRS	MRW	MRI	MTV	MTS	MTW	MTI	MTXV	MTXS	MTXW	MTXI	MMST	HDI	KD	SKW	FPC
MLV	0.09
MLS	-0.66****	-0.12
MLW	-0.18**	0.51****	0.1
MLI	0.93****	0.31****	-0.71****	0.01
MPT	1.00****	0.08	-0.66****	-0.18**	0.93****
MPV	-0.31****	0.76****	0.47****	0.54****	-0.14*	-0.31****
MPW	-0.07	0.14*	0.04	0.62****	0.05	-0.07	0.17*
MPI	0.90****	0.42****	-0.66****	0.07	0.99****	0.90****	-0.01	0.07
MRT	0.92****	0.30****	-0.50****	-0.13	0.80****	0.92****	-0.03	-0.21**	0.78****
MRV	0.06	0.73****	-0.04	0.67****	0.31****	0.06	0.62****	0.57****	0.41****	-0.06
MRS	0.60****	-0.09	-0.52****	-0.17*	0.55****	0.60****	-0.38****	-0.04	0.48****	0.52****	-0.13
MRW	0.41****	0.13	-0.51****	0.31****	0.55****	0.41****	-0.17*	0.52****	0.52****	0.18**	0.45****	0.52****
MRI	0.75****	0.68****	-0.36****	0.17*	0.79****	0.75****	0.40****	-0.05	0.85****	0.86****	0.30****	0.33****	0.19**
MTV	0.5****	0.69****	-0.36****	0.44****	0.74****	0.57****	0.40****	0.38****	0.80****	0.49****	0.80****	0.26***	0.55****	0.73****
MTS	-0.01	-0.36****	0.03	-0.22**	-0.1	-0.01	-0.31****	-0.01	-0.14*	-0.32****	-0.23**	-0.01	-0.07	-0.37****	-0.29****
MTW	0.77****	0.09	-0.42****	0.08	0.78****	0.77****	-0.12	0.25***	0.76****	0.62****	0.23***	0.50****	0.60****	0.62****	0.63****	0.05
MTI	-0.46****	0.76****	0.26****	0.64****	-0.18**	-0.46****	0.83****	0.35****	-0.06	-0.22**	0.84****	-0.30****	0.16*	0.28****	0.37****	-0.31****	-0.24***
MTXV	0.57****	0.70****	-0.36****	0.44****	0.73****	0.57****	0.40****	0.38****	0.80****	0.49****	0.80****	0.26***	0.55****	0.73****	0.99****	-0.30****	0.62****	0.38****
MTXS	0.1	-0.06	-0.08	-0.12	0.07	0.1	-0.11	0.01	0.06	0.05	-0.09	0.07	0.01	0.01	-0.03	0.56****	0.07	-0.14*	-0.03
MTXW	0.77****	0.09	-0.42****	0.08	0.78****	0.77****	-0.12	0.25***	0.76****	0.62****	0.23***	0.50****	0.60****	0.62****	0.63****	0.05	1.00****	-0.24***	0.62****	0.07
MTXI	-0.46****	0.76****	0.26****	0.64****	-0.18**	-0.46****	0.83****	0.35****	-0.06	-0.22**	0.84****	-0.30****	0.16*	0.28****	0.37****	-0.31****	-0.24***	1.00****	0.38****	-0.14*	-0.24***
MMST	-0.62****	0.22**	0.66****	0.43****	-0.52****	-0.62****	0.61****	0.25****	-0.45****	-0.51****	0.33****	-0.60****	-0.28****	-0.23**	-0.08	-0.07	-0.37****	0.56****	-0.08	-0.13*	-0.37****	0.56****
HDI	0.17*	-0.01	-0.14*	-0.05	0.16*	0.17*	-0.15*	-0.09	0.14*	0.14*	-0.07	0.15*	0.04	0.06	0.05	-0.06	0.06	-0.12	0.06	-0.01	0.06	-0.12	-0.14*
KD	-0.18**	-0.06	0.01	-0.02	-0.17*	-0.18**	-0.01	0.03	-0.18**	-0.05	-0.07	0.03	-0.04	-0.09	-0.1	-0.04	-0.09	0.04	-0.1	-0.01	-0.09	0.04	0.09	0.15*
SKW	-0.09	-0.04	-0.1	-0.04	-0.09	-0.09	-0.06	0.03	-0.09	0.01	-0.03	0.06	0.02	-0.04	-0.06	-0.02	-0.04	0.01	-0.06	0.02	-0.04	0.01	0.04	0.03	0.86****
FPC	-0.19**	0.35****	0.29****	0.35****	-0.1	-0.19**	0.48****	0.25***	-0.04	-0.13	0.43****	-0.25***	-0.01	0.07	0.24***	-0.1	-0.09	0.43****	0.24***	-0.14*	-0.09	0.43****	0.42****	-0.08	-0.02	-0.06
WAB	-0.08	0.27****	0.15*	0.26****	-0.01	-0.08	0.33****	0.20**	0.02	-0.02	0.34****	-0.1	0.03	0.11	0.23***	-0.04	-0.01	0.31****	0.23***	-0.07	-0.01	0.31****	0.29****	-0.04	-0.04	-0.03	0.80****
a MLT, midline left time; MLV, midline left value; MLS, midline left slope; MLW, midline left width; MLI, midline left integral; MPT, midline peak time; MPV, midline peak value; MPW, midline peak width; MPI, midline peak integral; MRT, midline right time; MRV, midline right value; MRS, midline right slope; MRW, midline right width; MRI, midline right integral; MTV, midline trail value; MTS, midli…
*, **,***, ****, significant at 0.05, 0.01, 0.001, and 0.0001 probability levels, respectively

## Sheet: Table S4
Table S4. Correlation matrix for kernel characteristics, dough rheological properties, and grain mineral concentrations for environment ET14.
Variablea	MLT	MLV	MLS	MLW	MLI	MPT	MPV	MPW	MPI	MRT	MRV	MRS	MRW	MRI	MTV	MTS	MTW	MTI	MTXV	MTXS	MTXW	MTXI	MMST	HDI	KD	SKW	FPC	WAB	Mg	Na	P	S	K	Ca	Mn	Fe	Cu	Zn	Rb	Sr	Mo	Cd	As	Ni	Co	Li
MLV	0.01
MLS	-0.71****	-0.25***
MLW	-0.21**	0.56****	0.16*
MLI	0.97****	0.15*	-0.75****	-0.12
MPT	1.00****	0.01	-0.71****	-0.21**	0.97****
MPV	-0.48****	0.72****	0.39****	0.65****	-0.36****	-0.48****
MPW	0.04	0.41****	0.05	0.57****	0.11	0.04	0.51****
MPI	0.96****	0.22**	-0.74****	-0.07	0.99****	0.96****	-0.29****	0.15*
MRT	0.98****	0.12	-0.71****	-0.15*	0.95****	0.98****	-0.39****	0.03	0.93****
MRV	-0.11	0.80****	0.06	0.65****	0.02	-0.11	0.89****	0.72****	0.09	-0.14*
MRS	0.55****	0.02	-0.54****	0.01	0.54****	0.55****	-0.35****	0.19**	0.52****	0.54****	-0.08
MRW	0.42****	0.44****	-0.41****	0.37****	0.48****	0.42****	0.18**	0.66****	0.51****	0.39****	0.50****	0.55****
MRI	0.92****	0.40****	-0.71****	0.05	0.96****	0.92****	-0.1	0.20**	0.97****	0.93****	0.13	0.49****	0.50****
MTV	0.51****	0.67****	-0.42****	0.43****	0.61****	0.51****	0.39****	0.63****	0.66****	0.53****	0.70****	0.40****	0.76****	0.72****
MTS	0.14*	-0.34****	0.05	-0.17**	0.09	0.14*	-0.27****	0.05	0.06	-0.16*	-0.13	-0.01	-0.05	-0.20**	-0.11
MTW	0.81****	0.05	-0.52****	0.01	0.82****	0.81****	-0.27****	0.38****	0.82****	0.77****	0.13	0.60****	0.63****	0.79****	0.62****	0.21**
MTI	-0.53****	0.75****	0.21**	0.63****	-0.37****	-0.53****	0.89****	0.47****	-0.30****	-0.41****	0.87****	-0.17*	0.31****	-0.09	0.37****	-0.29****	-0.28****
MTXV	0.50****	0.68****	-0.42****	0.43****	0.61****	0.50****	0.40****	0.63****	0.66****	0.53****	0.70****	0.40****	0.76****	0.72****	0.99****	-0.11	0.62****	0.38****
MTXS	0.01	-0.20**	0.06	-0.1	-0.03	0.01	-0.16*	0.01	-0.05	-0.1	-0.12	0.01	-0.01	-0.15*	-0.09	0.63****	0.02	-0.15*	-0.09
MTXW	0.81****	0.05	-0.52****	0.01	0.82****	0.81****	-0.27****	0.38****	0.82****	0.77****	0.13	0.60****	0.63****	0.79****	0.62****	0.21**	1.00****	-0.28****	0.62****	0.02
MTXI	-0.53****	0.75****	0.21**	0.63****	-0.37****	-0.53****	0.89****	0.47****	-0.30****	-0.41****	0.87****	-0.17*	0.31****	-0.09	0.37****	-0.29****	-0.28****	1.00****	0.38****	-0.15*	-0.28****
MMST	-0.46****	0.24***	0.32****	0.38****	-0.44****	-0.46****	0.50****	0.23***	-0.41****	-0.42****	0.37****	-0.31****	-0.1	-0.33****	-0.03	-0.14*	-0.40****	0.42****	-0.03	-0.08	-0.40****	0.42****
HDI	0.11	0.22***	-0.14*	0.15*	0.14*	0.11	0.13*	0.12	0.16*	0.1	0.25***	0.12	0.20**	0.18*	0.29****	-0.04	0.21**	0.16*	0.29****	-0.11	0.21**	0.16*	0.05
KD	-0.01	-0.01	-0.01	-0.06	-0.03	-0.01	-0.02	-0.09	-0.03	0.03	-0.08	-0.1	-0.08	0.01	-0.08	-0.01	-0.07	-0.05	-0.08	-0.08	-0.07	-0.05	0.05	-0.24***
SKW	0.05	0.01	-0.06	-0.05	0.04	0.05	-0.04	-0.01	0.04	0.09	-0.04	-0.03	0.01	0.08	-0.01	0.07	-0.01	-0.05	-0.01	0.02	-0.01	-0.05	0.02	-0.23***	0.84****
FPC	-0.1	0.28****	0.18**	0.17*	-0.08	-0.1	0.35****	0.12	-0.05	-0.08	0.32****	-0.19**	0.02	-0.01	0.19**	-0.09	-0.06	0.26****	0.19**	-0.11	-0.06	0.26****	0.12	0.33****	-0.02	-0.08
WAB	-0.1	0.16*	0.16*	0.05	-0.08	-0.1	0.25***	0.07	-0.06	-0.09	0.20**	-0.19**	-0.03	-0.04	0.09	-0.03	-0.07	0.17*	0.09	-0.12	-0.07	0.17*	0.06	0.19**	0.13	0.05	0.67****
Mg	-0.01	0.04497	0.05223	-0.01658	-0.00744	-0.01051	0.07895	-0.07952	-0.00251	0.01565	-0.03783	-0.15*	-0.09358	0.03813	-0.02494	-0.16*	-0.03707	0.01102	-0.02378	-0.17*	-0.03707	0.01102	-0.06186	0.04005	0.05078	0.06248	0.09465	0.32****
Na	-0.00502	0.01357	-0.02131	-0.00578	0.00426	-0.00502	-0.0101	-0.0604	0.00376	0.00762	-0.0609	-0.04557	-0.00586	0.02221	-0.02645	-0.13455	0.01251	-0.00337	-0.02532	-0.11333	0.01251	-0.00337	-0.05481	0.04149	-0.01282	0.01527	-0.01851	0.18**	0.73****
P	-0.00622	-0.00932	-0.01979	-0.14*	-0.00797	-0.00622	-0.01529	-0.20**	-0.00944	0.039	-0.12022	-0.14*	-0.13658	0.02857	-0.07518	-0.20**	-0.08855	-0.0436	-0.07333	-0.15*	-0.08855	-0.0436	-0.04833	-0.09192	0.10851	0.14*	0.02056	0.14*	0.79****	0.62****
S	-0.09642	0.1222	0.10649	0.15*	-0.07831	-0.09642	0.19**	0.04678	-0.0659	-0.04046	0.12814	-0.14*	-0.01165	0.00323	0.06036	-0.18**	-0.07881	0.15*	0.06178	-0.17*	-0.07881	0.15*	0.11448	0.18**	-0.22***	-0.17*	0.08876	0.23***	0.60****	0.46****	0.41****
K	-0.09363	0.12024	0.01573	0.06512	-0.06143	-0.09363	0.12556	-0.02331	-0.05248	-0.08758	0.05375	-0.1232	-0.02803	-0.03007	-0.0054	-0.10034	-0.13459	0.13116	-0.00423	-0.02979	-0.13459	0.13116	-0.02688	0.03347	0.07355	0.13069	0.10655	0.28****	0.47****	0.41****	0.34****	0.21**
Ca	-0.09546	0.12185	0.05501	0.00092	-0.07557	-0.09546	0.14*	-0.10372	-0.06505	-0.08356	0.04966	-0.24***	-0.07907	-0.04256	-0.04745	-0.12991	-0.17*	0.11507	-0.0458	-0.02241	-0.17*	0.11507	0.00663	0.02622	0.03413	0.07196	0.24***	0.32****	0.43****	0.28****	0.37****	0.161*	0.51****
Mn	0.03577	0.06161	-0.04342	-0.00341	0.0498	0.03577	0.01832	0.03851	0.05293	0.04168	0.0322	0.03838	0.07509	0.06089	0.0634	-0.02811	0.03986	0.04581	0.06346	-0.04815	0.03986	0.04581	-0.04464	0.00711	-0.16*	-0.06433	0.07771	0.18**	0.36****	0.43****	0.27****	0.41****	0.04291	0.14*
Fe	0.11352	0.0112	0.00533	-0.03029	0.14*	0.11352	-0.01872	-0.02046	0.14*	0.10667	-0.03187	-0.0756	-0.0343	0.13016	0.04217	-0.01097	0.07237	-0.01553	0.04218	-0.01321	0.07237	-0.01553	-0.06772	-0.13*	0.0793	0.07131	0.13496	0.20**	0.22***	0.08525	0.09754	-0.06086	0.16*	0.26***	0.104
Cu	-0.01155	0.04271	0.01496	-0.00795	0.01315	-0.01155	0.08885	-0.01469	0.01901	-0.02127	0.08476	-0.10402	0.01045	0.03123	0.04416	0.0381	-0.01886	0.09048	0.04333	-0.05548	-0.01886	0.09048	0.001	0.1314	0.17*	0.18**	0.09307	0.19**	0.41****	0.17**	0.35****	0.16*	0.27****	0.31****	-0.02693	0.18**
Zn	-0.05539	0.22**	0.03413	0.20**	0.00087	-0.05539	0.24***	0.11896	0.01996	-0.0358	0.19**	-0.09991	0.06091	0.06255	0.11561	-0.13411	-0.08513	0.23***	0.11713	-0.02212	-0.08513	0.23***	0.17*	0.19**	-0.25***	-0.27****	0.15*	0.10328	0.19**	0.17**	0.13*	0.33****	0.06081	0.14*	0.34****	0.09086	0.15*
Rb	-0.05856	0.25***	0.00239	0.22**	0.00213	-0.05856	0.23***	0.1167	0.02146	-0.03277	0.19**	-0.06061	0.07298	0.06846	0.12926	-0.0877	-0.06012	0.25***	0.13021	-0.01417	-0.06012	0.25***	0.09454	0.26***	-0.27****	-0.26****	0.20**	0.10906	0.25***	0.23***	0.19**	0.38****	0.05942	0.15*	0.44****	0.0333	0.19**	0.90****
Sr	0.01342	0.04315	0.00801	-0.06261	0.03963	0.01342	0.05338	-0.09711	0.04399	0.03088	-0.0274	-0.20**	-0.13105	0.06978	-0.04013	-0.09278	-0.05075	0.02453	-0.03946	-0.107	-0.05075	0.02453	-0.03175	0.03581	0.12943	0.08164	0.13215	0.26***	0.55****	0.28****	0.47****	0.18**	0.36****	0.41****	-0.14*	0.41****	0.59****	0.17*	0.17**
Mo	-0.03748	0.11561	0.07194	0.05736	-0.00983	-0.03748	0.12938	-0.01527	0.00023	-0.02788	0.05672	-0.18**	-0.05411	0.02487	0.00331	-0.14*	-0.08437	0.09895	0.00427	-0.15*	-0.08437	0.09895	-0.02349	0.07047	-0.0636	-0.08438	0.22**	0.28****	0.71****	0.46****	0.53****	0.39****	0.48****	0.53****	0.10781	0.31****	0.49****	0.30****	0.35****	0.68****
Cd	-0.01979	0.0592	0.04708	-0.01844	-0.00619	-0.01979	0.10443	-0.02681	0.00043	0.04677	-0.01363	-0.11846	-0.06553	0.08485	-0.00811	-0.12405	-0.04174	0.05232	-0.0073	-0.13*	-0.04174	0.05232	-0.03515	0.10517	0.03907	0.04743	0.21**	0.41****	0.81****	0.54****	0.63****	0.46****	0.47****	0.42****	0.31****	0.27****	0.50****	0.31****	0.37****	0.61****	0.71****
As	-0.03278	0.12337	0.0044	0.02131	-0.00184	-0.03278	0.12586	-0.08163	0.00812	-0.01401	0.04134	-0.14*	-0.05259	0.03485	0.03108	-0.12787	-0.0711	0.10727	0.03199	-0.12538	-0.0711	0.10727	-0.01919	0.05876	0.10925	0.09957	0.29****	0.44****	0.70****	0.42****	0.57****	0.34****	0.40****	0.40****	0.15*	0.39****	0.56****	0.28****	0.31****	0.66****	0.64****	0.74****
Ni	-0.00625	0.11003	0.0878	0.16*	0.01813	-0.00625	0.16*	0.06873	0.02967	0.01184	0.07189	-0.12615	-0.02625	0.06976	0.04929	-0.11858	-0.02244	0.09115	0.05003	-0.12807	-0.02244	0.09115	-0.01608	0.13*	-0.09697	-0.13596	0.14*	0.31****	0.71****	0.52****	0.43****	0.58****	0.29****	0.27****	0.39****	0.19**	0.26****	0.52****	0.57****	0.41****	0.60****	0.65****	0.56****
Co	-0.01732	0.08567	0.03195	0.01405	-0.00352	-0.01732	0.10996	-0.08183	0.00419	0.01551	-0.01006	-0.16644	-0.08535	0.05314	0.00034	-0.15*	-0.03234	0.04813	0.00128	-0.19**	-0.03234	0.04813	-0.06216	0.06195	0.10303	0.10305	0.15*	0.37****	0.96****	0.68****	0.79****	0.57****	0.46****	0.43****	0.32****	0.21**	0.44****	0.22**	0.29****	0.56****	0.69****	0.81****	0.75****	0.73****
Li	-0.03886	0.15*	-0.02794	0.1031	-0.00156	-0.03886	0.1226	0.00527	0.00894	0.03346	0.04383	-0.05667	0.024	0.09209	0.05619	-0.18759	-0.00763	0.13*	0.05769	-0.16*	-0.00763	0.13*	-0.04274	0.18**	-0.14*	-0.11222	0.07585	0.17**	0.81****	0.71****	0.67****	0.63****	0.35****	0.31****	0.45****	0.06131	0.34****	0.40****	0.55****	0.41****	0.68****	0.68****	0.56****	0.69****	0.82****
Ti	-0.02839	0.07757	0.06848	0.06194	-0.01753	-0.02839	0.11852	0.01363	-0.00963	0.01345	0.02608	-0.09938	-0.03025	0.04754	0.02117	-0.15*	-0.03057	0.06161	0.02231	-0.15*	-0.03057	0.06161	-0.01424	0.14*	-0.09798	-0.06841	0.18**	0.35****	0.91****	0.71****	0.68****	0.66****	0.41****	0.38****	0.40****	0.15*	0.41****	0.30****	0.40****	0.52****	0.73****	0.81****	0.67****	0.79****	0.88****	0.85****
a MLT, midline left time; MLV, midline left value; MLS, midline left slope; MLW, midline left width; MLI, midline left integral; MPT, midline peak time; MPV, midline peak value; MPW, midline peak width; MPI, midline peak integral; MRT, midline right time; MRV, midline right value; MRS, midline right slope; MRW, midline right width; MRI, midline right integral; MTV, midline trail value; MTS, midli…
*, **,***, ****, significant at 0.05, 0.01, 0.001, and 0.0001 probability levels, respectively

## Sheet: Table S5
Table S5. Correlation matrix for kernel characteristics and rheological properties for environment HY13.
Variablea	MLT	MLV	MLS	MLW	MLI	MPT	MPV	MPW	MPI	MRT	MRV	MRS	MRW	MRI	MTV	MTS	MTW	MTI	MTXV	MTXS	MTXW	MTXI	MMST	HDI	KD	SKW	FPC
MLV	-0.49****
MLS	-0.64****	0.24***
MLW	-0.41****	0.58****	0.31****
MLI	0.84****	-0.03	-0.66****	-0.09
MPT	1.00****	-0.49****	-0.64****	-0.41****	0.84****
MPV	-0.57****	0.97****	0.42****	0.62****	-0.15*	-0.57****
MPW	-0.1	0.39****	0.17**	0.76****	0.17*	-0.1	0.43****
MPI	0.75****	0.13	-0.61****	0.01	0.98****	0.75****	0.01	0.24***
MRT	0.91****	0.04	-0.57****	-0.23**	0.76****	0.91****	-0.1	-0.09	0.73****
MRV	-0.16	0.90****	0.03	0.38****	0.22*	-0.16	0.91****	0.35****	0.34****	-0.16
MRS	0.37****	-0.50****	-0.38****	0.11	0.27**	0.37****	-0.62****	0.27**	0.18*	0.13	-0.40****
MRW	0.12	0.22*	-0.16	0.65****	0.34****	0.12	0.18*	0.81****	0.36****	-0.08	0.43****	0.40****
MRI	0.67****	0.63****	-0.52****	-0.03	0.81****	0.67****	0.49****	0.06	0.85****	0.77****	0.45****	-0.18*	0.11
MTV	-0.23***	0.91****	0.15*	0.60****	0.22***	-0.23***	0.89****	0.52****	0.37****	0.20*	0.90****	-0.22*	0.49****	0.71****
MTS	0.49****	-0.44****	-0.18**	-0.24***	0.33****	0.49****	-0.42****	0.06	0.26****	-0.28**	-0.34****	0.34****	-0.01	-0.45****	-0.26****
MTW	0.63****	0.03	-0.36****	0.11	0.78****	0.63****	-0.01	0.49****	0.79****	0.46****	0.50****	0.18*	0.58****	0.69****	0.30****	0.46****
MTI	-0.72****	0.91****	0.36****	0.62****	-0.27****	-0.72****	0.92****	0.39****	-0.12	-0.33***	0.94****	-0.43****	0.35****	0.33****	0.76****	-0.48****	-0.13*
MTXV	-0.24***	0.91****	0.15*	0.60****	0.22**	-0.24***	0.89****	0.52****	0.37****	0.20*	0.90****	-0.22*	0.49****	0.71****	0.99****	-0.27****	0.29****	0.77****
MTXS	-0.01	-0.1	-0.0735	-0.05	-0.03	-0.01	-0.1	0.07	-0.04	-0.14	-0.01	0.05	0.03	-0.11	-0.17*	0.15*	0.01	-0.04	-0.16*
MTXW	0.63****	0.03	-0.36****	0.11	0.78****	0.63****	-0.01	0.49****	0.79****	0.46****	0.50****	0.18*	0.58****	0.69****	0.30****	0.46****	1.00****	-0.13*	0.29****	0.01
MTXI	-0.72****	0.91****	0.36****	0.62****	-0.27****	-0.72****	0.92****	0.39****	-0.12	-0.33***	0.94****	-0.43****	0.35****	0.33****	0.76****	-0.48****	-0.13*	1.00****	0.77****	-0.04	-0.13*
MMST	-0.60****	0.49****	0.46****	0.69****	-0.37****	-0.60****	0.54****	0.46****	-0.28****	-0.45****	0.14	-0.04	0.29**	-0.32***	0.39****	-0.25***	-0.21**	0.59****	0.39****	0.02	-0.21**	0.59****
HDI	0.02	0.01	-0.16*	0.01	0.07	0.02	-0.01	-0.03	0.07	0.1	0.028	0.08	0.03	0.09	0.01	-0.04	-0.01	0.02	0.01	-0.04	-0.01	0.02	0.01
KD	0.01	0.05	-0.03	0.12	0.03	0.01	0.05	0.07	0.04	0.15	-0.01	0.07	0.01	0.12	0.06	-0.02	0.02	0.02	0.06	0.04	0.02	0.02	0.04	0.44****
SKW	0.04	0.05	0.01	0.12	0.07	0.04	0.05	0.12	0.08	0.19*	-0.01	0.11	0.05	0.15	0.08	-0.01	0.12	0.01	0.08	0.02	0.12	0.01	0.07	0.19**	0.82****
FPC	-0.26****	0.21**	0.11	0.24***	-0.08	-0.26****	0.21**	0.14*	-0.05	-0.16	0.04	0.17	0.15	-0.13	0.20**	-0.06	-0.04	0.29****	0.20**	0.02	-0.04	0.29****	0.28****	-0.04	-0.01	0.02
WAB	-0.17*	0.13	0.11	0.14*	-0.07	-0.17*	0.14*	0.06	-0.05	-0.08	-0.03	0.07	0.01	-0.09	0.13*	-0.02	-0.04	0.16*	0.13*	0.02	-0.04	0.16*	0.18**	-0.07	-0.01	0.02	0.96****
a MLT, midline left time; MLV, midline left value; MLS, midline left slope; MLW, midline left width; MLI, midline left integral; MPT, midline peak time; MPV, midline peak value; MPW, midline peak width; MPI, midline peak integral; MRT, midline right time; MRV, midline right value; MRS, midline right slope; MRW, midline right width; MRI, midline right integral; MTV, midline trail value; MTS, midli…
*, **,***, ****, significant at 0.05, 0.01, 0.001, and 0.0001 probability levels, respectively

## Sheet: Table S6
Table S6. QTL for end-use quality traits detected once from individual and across environment analyses.																												Table S6. QTL for end-use quality traits detected once from individual and across environment analyses.
QTL name	Traita	ENVb	Chr	Peak (Mb)	Left marker	Left marker cM	Left marker Mbp	Right marker	Right marker cM	Right marker Mb	LOD threshold	LODc	LOD(A)	LOD(AbyE)	PVEd	PVE(A)	PVE(AbyE)	Add	Alleles increase trait	Pleiotropic QTL	Peak(cM)	AbyE_HY13	AbyE_BS14	AbyE_ET14			order	QTL name	Traita	ENVb	Chr	Peak (Mb)	after remove duplicates base on trait, chrom, Mbp.
Qfpc.tamu.3B.695	FPC	MET-ADD	3B	695.132	IWB9039	76.69	683.43	IWB2741	90.68	696.729	4.6	13.3	9.49	3.8	11.25	8.88	2.37	-0.16	TAM 111	Y	89	0.08	-0.11	0.02			1	Qfpc.tamu.3B.695	FPC	MET-ADD	3B	695.132
Qfpc.tamu.3B.697	FPC	ET14	3B	696.884	IWB2741	90.68	696.729	IWB29288	107.75	705.004	3.2	5.4			9.1			-0.1	TAM 111	Y	91						2	Qfpc.tamu.3B.697	FPC	ET14	3B	696.884
Qfpc.tamu.3B.699	FPC	BS14	3B	699.308	IWB2741	90.68	696.729	IWB29288	107.75	705.004	3.2	6			13.1			-0.3	TAM 111	Y	96						3	Qfpc.tamu.3B.699	FPC	BS14	3B	699.308
Qfpc.tamu.5B.371	FPC	MET-ADD	5B	371.307	IWB8599	42.51	356.597	IWB27185	43.24	378.513	4.6	4.68	2.97	1.71	4.72	2.8	1.92	0.09	CO960293-2		43	-0.06	0.1	-0.04			4	Qfpc.tamu.5B.371	FPC	MET-ADD	5B	371.307
Qfpc.tamu.5B.522	FPC	ET14	5B	522.07	IWB20925	84.49	520.885	IWB20240	85.48	523.186	3.2	3.9			6.5			0.1	CO960293-2		85						5	Qfpc.tamu.5B.522	FPC	ET14	5B	522.07
Qfpc.tamu.5B.680	FPC	MET-ADD	5B	679.768	IWB8498	187.75	679.688	IWB56872	189.56	679.804	4.6	10.43	7.83	2.6	9.3	7.49	1.81	0.14	CO960293-2	Y	189	-0.07	0.1	-0.03			6	Qfpc.tamu.5B.680	FPC	MET-ADD	5B	679.768
Qfpc.tamu.5B.680	FPC	ET14	5B	679.768	IWB8498	187.75	679.688	IWB56872	189.56	679.804	3.2	3.8			6.5			0.1	CO960293-2	Y	189						8	Qfpc.tamu.5B.685	FPC	BS14	5B	684.561
Qfpc.tamu.5B.685	FPC	BS14	5B	684.561	IWB26719	193.68	684.495	IWB44703	194.24	684.611	3.2	3.7			5.7			0.2	CO960293-2	Y	194						9	Qgcdc.tamu.3B.46	GCDC	ET14	3B	46.4844
Qgcdc.tamu.3B.46	GCD	ET14	3B	46.4844	IWB32390	49.83	45.2821	IWB37006	50.34	48.8889	3.4	5.8			8			-0.0058	TAM 111		50						10	Qgcdc.tamu.5A.577	GCDC	ET14	5A	577.104
Qgcdc.tamu.5A.577	GCD	ET14	5A	577.104	IWB14134	108.53	564.498	IWB38719	121.83	577.943	3.4	5.5			8			-0.0057	TAM 111		121						11	Qgcdc.tamu.7B.552	GCDC	ET14	7B	551.532
Qgcdc.tamu.7B.552	GCD	ET14	7B	551.532	IWB34472	75.71	548.386	IWB3017	77.24	552.117	3.4	5.4			7.6			-0.0055	TAM 111		77						12	Qgcoc.tamu.3B.32	GCOC	ET14	3B	31.5083
Qgcoc.tamu.3B.32	GCO	ET14	3B	31.5083	IWB2169	34.43	25.2765	IWB59331	43.42	31.8137	3.4	5.6			11.6			-0.0033	TAM 111		43						13	Qglic.tamu.2B.6	GLIC	ET14	2B	6.33768
Qglic.tamu.2B.6	GLI	ET14	2B	6.33768	IWB32486	0	6.33768	IWB26313	0.25	6.71275	3.4	3.8			7.8			0.0042	CO960293-2		0						14	Qgmoc.tamu.3B.540	GMOC	ET14	3B	540.083
Qgmoc.tamu.3B.540	GMO	ET14	3B	540.083	IWB27319	64.61	539.56	IWB35680	66.98	542.735	3.4	4.8			8.6			0.036	CO960293-2		65						15	Qgrbc.tamu.2B.47	GRBC	ET14	2B	47.173
Qgrbc.tamu.2B.47	GRB	ET14	2B	47.173	IWB49164	56.7	47.1696	IWB54531	57.74	47.1814	3.4	6.2			8.6			0.1	CO960293-2	Y	57						16	Qgrbc.tamu.4B.390	GRBC	ET14	4B	389.718
Qgrbc.tamu.4B.390	GRB	ET14	4B	389.718	IWB26862	112.42	286.125	IWB61082	135.14	406.331	3.4	3.7			6.2			-0.1	TAM 111		132						17	Qgrbc.tamu.5B.566	GRBC	ET14	5B	565.886
Qgrbc.tamu.5B.566	GRB	ET14	5B	565.886	IWB48878	114.4	565.769	IWB18958	115.19	565.923	3.4	6.5			8.8			0.1	CO960293-2	Y	115						18	Qgsrc.tamu.2B.47	GSRC	ET14	2B	47.173
Qgsrc.tamu.2B.47	GSR	ET14	2B	47.173	IWB49164	56.7	47.1696	IWB54531	57.74	47.1814	3.4	4.3			6.7			0.2	CO960293-2	Y	57						19	Qgsrc.tamu.5B.566	GSRC	ET14	5B	565.886
Qgsrc.tamu.5B.566	GSR	ET14	5B	565.886	IWB48878	114.4	565.769	IWB18958	115.19	565.923	3.4	7.6			12.2			0.3	CO960293-2	Y	115						20	Qhdi.tamu.1A.407	HDI	ET14	1A	406.803
Qhdi.tamu.1A.407	HDI	ET14	1A	406.803	IWB54227	173.73	518.019	IWB35531	187.93	532.816	3.2	5.1			7.5			-1.5	TAM 111		67						21	Qhdi.tamu.1A.520	HDI	MET-ADD	1A	520.385
Qhdi.tamu.1A.520	HDI	MET-ADD	1A	520.385	IWB54227	173.73	518.019	IWB35531	187.93	532.816	4.6	6.09	4.25	1.83	4.15	3.08	1.07	-0.7	TAM 111		176	0.43	0.12	-0.55			22	Qhdi.tamu.1B.15	HDI	ET14	1B	15.3556
Qhdi.tamu.1B.15	HDI	ET14	1B	15.3556	IWB7076	3.5	8.5597	IWB10908	4.5	22.1515	3.2	3.6			4.2			1.1	CO960293-2		4						23	Qhdi.tamu.1B.303	HDI	MET-ADD	1B	302.777
Qhdi.tamu.1B.303	HDI	MET-ADD	1B	302.777	IWB9806	66.18	278.687	IWB34685	67.71	323.635	4.6	6.62	5.15	1.46	5	3.83	1.17	0.78	CO960293-2		67	-0.57	0.46	0.11			25	Qhdi.tamu.2B.48	HDI	MET-ADD	2B	47.5704
Qhdi.tamu.1B.303	HDI	BS14	1B	302.777	IWB9806	66.18	278.687	IWB34685	67.71	323.635	3.2	4.1			7.2			1.3	CO960293-2		67						26	Qhdi.tamu.2B.54	HDI	BS14	2B	54.379
Qhdi.tamu.2B.48	HDI	MET-ADD	2B	47.5704	IWB34849	57.74	47.4305	IWB55506	58.5	47.8395	4.6	5.16	2.33	2.82	4.22	1.7	2.51	-0.53	TAM 111	Y	58	-0.9	0.49	0.41			27	Qhdi.tamu.2B.56	HDI	MET-ADD	2B	55.7231
Qhdi.tamu.2B.54	HDI	BS14	2B	54.379	IWA7916	60.32	53.4651	IWB43273	62.79	56.7849	3.2	9			16.7			2	CO960293-2		61						29	Qhdi.tamu.2B.711	HDI	MET-ADD	2B	710.591
Qhdi.tamu.2B.56	HDI	MET-ADD	2B	55.7231	IWA7916	60.32	53.4651	IWB43273	62.79	56.7849	4.6	23.79	16.62	7.17	18.78	12.59	6.19	1.42	CO960293-2		62	-1.38	0.47	0.91			30	Qhdi.tamu.2D.62	HDI	MET-ADD	2D	62.1457
Qhdi.tamu.2B.56	HDI	ET14	2B	55.7231	IWA7916	60.32	53.4651	IWB43273	62.79	56.7849	3.2	14.9			20.3			2.4	CO960293-2		62						31	Qhdi.tamu.5A.30	HDI	MET-ADD	5A	29.5965
Qhdi.tamu.2B.711	HDI	MET-ADD	2B	710.591	IWB2073	121.86	710.286	IWB36072	122.92	712.601	4.6	4.64	4.53	0.11	3.35	3.31	0.04	0.72	CO960293-2		122	-0.11	0.08	0.03			32	Qhdi.tamu.5B.585	HDI	MET-ADD	5B	584.605
Qhdi.tamu.2D.62	HDI	MET-ADD	2D	62.1457	IWA6452	36.77	62.024	IWA7273	37.27	62.2886	4.6	5.27	0.42	4.84	4.29	0.33	3.97	0.23	CO960293-2		37	1.11	-0.46	-0.65			34	Qkd.tamu.1D.190	KD	MET-ADD	1D	190.226
Qhdi.tamu.5A.30	HDI	MET-ADD	5A	29.5965	IWB31392	14.51	29.5144	IWB31441	15.51	29.6819	4.6	5	3.34	1.67	4.09	2.52	1.57	-0.63	TAM 111		15	-0.69	0.44	0.26			36	Qkd.tamu.2B.66	KD	HY13	2B	66.1276
Qhdi.tamu.5B.585	HDI	MET-ADD	5B	584.605	IWB51364	124.78	580.91	IWB179	129	585.752	4.6	6.26	5.32	0.94	4.52	4.01	0.51	0.79	CO960293-2		128	-0.32	-0.04	0.37			37	Qkd.tamu.2B.68	KD	MET-ADD	2B	67.6657
Qhdi.tamu.5B.585	HDI	ET14	5B	584.605	IWB51364	124.78	580.91	IWB179	129	585.752	3.2	4.1			5			1.2	CO960293-2		128						38	Qkd.tamu.2B.69	KD	ET14	2B	69.2038
Qkd.tamu.1D.190	KD	MET-ADD	1D	190.226	IWB21340	94.19	122.549	IWB7344	95.19	206.101	4.6	4.93	1.19	3.74	4.41	1.01	3.4	-0.01	TAM 111		95	0.01	-0.02	0.01			39	Qkd.tamu.4D.390	KD	MET-ADD	4D	389.532
Qkd.tamu.1D.190	KD	BS14	1D	190.226	IWB21340	94.19	122.549	IWB7344	95.19	206.101	3.2	4.8			6.5			0	CO960293-2		95						41	Qkd.tamu.5A.610	KD	MET-ADD	5A	609.992
Qkd.tamu.2B.66	KD	HY13	2B	66.1276	IWB25663	65.57	65.4662	IWB7072	81.19	89.4916	8.0	8.7			8.3			0.01	CO960293-2		66						43	Qkd.tamu.5A.644	KD	MET-ADD	5A	644.109
Qkd.tamu.2B.68	KD	MET-ADD	2B	67.6657	IWB25663	65.57	65.4662	IWB7072	81.19	89.4916	4.6	9.99	4.48	5.51	8.25	3.74	4.51	-0.01	TAM 111		67	-0.01	0.02	-0.01			44	Qkd.tamu.5B.318	KD	BS14	5B	317.7
Qkd.tamu.2B.69	KD	ET14	2B	69.2038	IWB25663	65.57	65.4662	IWB7072	81.19	89.4916	3.2	3.7			6.1			0.01	CO960293-2		68						45	Qkd.tamu.7A.581	KD	MET-ADD	7A	581.375
Qkd.tamu.4D.390	KD	MET-ADD	4D	389.532	IWA2080	1.97	388.93	IWA5751	2.96	408.793	4.6	5.76	4.43	1.32	5.38	3.81	1.57	0.01	CO960293-2		2	0	-0.01	0.01			47	Qkd.tamu.7A.661	KD	BS14	7A	660.76
Qkd.tamu.4D.390	KD	ET14	4D	389.532	IWA2080	1.97	388.93	IWA5751	2.96	408.793	3.2	3.8			5			0	TAM 111		2						48	Qmli.tamu.1A.3	MLI	ET14	1A	2.84965
Qkd.tamu.5A.610	KD	MET-ADD	5A	609.992	IWB6903	141.19	609.21	IWB9165	143.44	610.182	4.6	6.49	4.46	2.03	5.89	3.8	2.09	-0.01	TAM 111	Y	143	0.01	-0.01	0			49	Qmli.tamu.1A.4	MLI	BS14	1A	4.18904
Qkd.tamu.5A.610	KD	BS14	5A	609.992	IWB6903	141.19	609.21	IWB9165	143.44	610.182	3.2	5.2			7.3			0	CO960293-2	Y	143						50	Qmli.tamu.1A.6	MLI	MET-ADD	1A	5.58589
Qkd.tamu.5A.644	KD	MET-ADD	5A	644.109	IWB48788	156.77	643.623	IWB68078	158.54	647.365	4.6	5.06	2.98	2.08	4.17	2.58	1.6	-0.01	TAM 111		157	-0.01	0.01	0			51	Qmli.tamu.1B.5	MLI	MET-ADD	1B	4.54104
Qkd.tamu.5B.318	KD	BS14	5B	317.7	IWB4337	40.52	317.7	IWB58827	41.03	317.7	3.2	3.3			4.5			0	CO960293-2		41						53	Qmli.tamu.1B.303	MLI	BS14	1B	302.777
Qkd.tamu.7A.581	KD	MET-ADD	7A	581.375	IWA476	144.99	581.375	IWA477	145.23	581.375	4.6	5.14	3.81	1.33	5.29	3.29	2	0.01	CO960293-2		145	-0.01	-0.01	0.01			54	Qmli.tamu.1D.1	MLI	BS14	1D	0.739904
Qkd.tamu.7A.581	KD	ET14	7A	581.375	IWA476	144.99	581.375	IWA477	145.23	581.375	3.2	4.6			6.1			0	TAM 111		145						55	Qmli.tamu.1D.1	MLI	MET-ADD	1D	1.12288
Qkd.tamu.7A.661	KD	BS14	7A	660.76	IWA614	165.25	660.465	IWA4196	173.72	663.802	3.2	3.5			4.8			0	TAM 111		166						57	Qmli.tamu.1D.73	MLI	MET-ADD	1D	72.7269
Qmli.tamu.1A.3	MLI	ET14	1A	2.84965	IWB12147	0	2.37821	IWB7628	1.57	3.11837	3.2	10.7			8.4			-15.4	TAM 111	Y	1						58	Qmli.tamu.1D.413	MLI	MET-ADD	1D	412.752
Qmli.tamu.1A.4	MLI	BS14	1A	4.18904	IWB13355	1.82	4.06333	IWB12354	5.53	6.65448	3.2	15.8			11.1			-17.4	TAM 111	Y	2						60	Qmli.tamu.1D.417	MLI	MET-ADD	1D	417.371
Qmli.tamu.1A.6	MLI	MET-ADD	1A	5.58589	IWB13355	1.82	4.06333	IWB12354	5.53	6.65448	4.6	12.09	9.72	2.37	6.3	4.81	1.49	-8.36	TAM 111	Y	4	-4.32	-2.15	6.47			61	Qmli.tamu.1D.420	MLI	HY13	1D	419.881
Qmli.tamu.1B.5	MLI	MET-ADD	1B	4.54104	IWB11290	0.25	4.34957	IWB59268	2.01	4.79887	4.6	47.04	45.62	1.41	27.07	26.27	0.8	19.63	CO960293-2	Y	1	0.66	-4.49	3.83			62	Qmli.tamu.5B.424	MLI	MET-ADD	5B	424.314
Qmli.tamu.1B.5	MLI	BS14, ET14, HY13	1B	4.54104	IWB11290	0.25	4.34957	IWB59268	2.01	4.79887	3.2-8.0	13.7~23.0			13.4~20.5			20.6~24.2	CO960293-2	Y	1						64	Qmls.tamu.1B.5	MLS	MET-ADD	1B	4.54104
Qmli.tamu.1B.303	MLI	BS14	1B	302.777	IWB9806	66.18	278.687	IWB34685	67.71	323.635	3.2	4.2			2.7			8.6	CO960293-2	Y	67						66	Qmls.tamu.1B.374	MLS	BS14	1B	374.44
Qmli.tamu.1D.1	MLI	BS14	1D	0.739904	IWB3277	0.26	0.615246	IWB9223	1.27	0.785387	3.2	6.5			4			-10.5	TAM 111	Y	1						67	Qmls.tamu.1B.554	MLS	MET-ADD	1B	553.66
Qmli.tamu.1D.1	MLI	MET-ADD	1D	1.12288	IWB6058	1.27	0.791411	IWB14030	16.78	7.83407	4.6	11.18	10.96	0.22	5.58	5.52	0.05	-8.98	TAM 111	Y	2	-0.5	1.22	-0.72			68	Qmls.tamu.1D.64	MLS	MET-ADD	1D	64.4468
Qmli.tamu.1D.1	MLI	ET14	1D	1.12288	IWB6058	1.27	0.791411	IWB14030	16.78	7.83407	3.2	4.7			3.5			-10	TAM 111	Y	2						69	Qmls.tamu.1D.65	MLS	HY13	1D	65.1478
Qmli.tamu.1D.73	MLI	MET-ADD	1D	72.7269	IWB4265	75.5	66.203	IWB9742	76.24	75.8584	4.6	23.27	8.44	14.83	12.48	4.27	8.2	7.9	CO960293-2	Y	76	-7.07	15.45	-8.38			70	Qmls.tamu.1D.414	MLS	MET-ADD	1D	413.968
Qmli.tamu.1D.413	MLI	MET-ADD	1D	412.752	IWA5577	112.65	412.091	Glu.D1d	113.82	414.3	4.6	29.16	12.5	16.65	17.61	6.29	11.31	9.59	CO960293-2	Y	113	-9.99	-8.16	18.15			72	Qmls.tamu.1D.417	MLS	MET-ADD	1D	417.371
Qmli.tamu.1D.289	MLI	BS14, ET14	1D	412.752	IWA5577	112.65	412.091	Glu.D1d	113.82	414.3	3.2	36.2			31.3			29.4	CO960293-2	Y	113						74	Qmlt.tamu.1A.2	MLT	BS14	1A	2.37821
Qmli.tamu.1D.417	MLI	MET-ADD	1D	417.371	IWB57122	115.23	416.405	IWA1559	169.42	484.404	4.6	20.27	11.27	9	14.69	5.48	9.22	8.94	CO960293-2	Y	116	16.4	-7.9	-8.49			75	Qmlt.tamu.1A.3	MLT	ET14	1A	2.84965
Qmli.tamu.1D.420	MLI	HY13	1D	419.881	IWB57122	115.23	416.405	IWA1559	169.42	484.404	8.0	20.9			27.7			29.5	CO960293-2		118						76	Qmlt.tamu.1A.74	MLT	MET-ADD	1A	73.5721
Qmli.tamu.5B.424	MLI	MET-ADD	5B	424.314	IWB9055	50.76	421.644	IWB42727	52.01	424.336	4.6	4.78	3.29	1.49	2.35	1.63	0.73	4.87	CO960293-2	Y	52	0.08	-4.02	3.94			77	Qmlt.tamu.1B.5	MLT	MET-ADD	1B	4.54104
Qmli.tamu.5B.424	MLI	ET14	5B	424.314	IWB9055	50.76	421.644	IWB42727	52.01	424.336	3.2	3.8			2.7			8.8	CO960293-2	Y	52						79	Qmlt.tamu.1D.1	MLT	MET-ADD	1D	1.12288
Qmls.tamu.1B.5	MLS	MET-ADD	1B	4.54104	IWB11290	0.25	4.34957	IWB59268	2.01	4.79887	4.6	15.59	11.2	4.38	21.89	13.96	7.93	-1.05	TAM 111	Y	1	-0.06	-0.94	1			81	Qmlt.tamu.1D.2	MLT	BS14	1D	1.57696
Qmls.tamu.1B.5	MLS	BS14, ET14, HY13	1B	4.54104	IWB11290	0.25	4.34957	IWB59268	2.01	4.79887	3.2-8.0	10.2~12.8			14.2~14.5			-1.5~-3.2	TAM 111	Y	1						82	Qmlt.tamu.1D.289	MLT	ET14	1D	412.752
Qmls.tamu.1B.374	MLS	BS14	1B	374.44	IWB50530	69.98	374.34	IWB50917	70.99	379.383	3.2	5.9			6.1			-2.1	TAM 111		70						83	Qmlt.tamu.1D.414	MLT	MET-ADD	1D	413.968
Qmls.tamu.1B.554	MLS	MET-ADD	1B	553.66	IWB10372	79.39	551.222	IWB54285	80.41	555.298	4.6	4.76	2.79	1.97	9.54	3.38	6.16	-0.52	TAM 111		80	0.52	-1	0.48			84	Qmlt.tamu.1D.417	MLT	MET-ADD	1D	417.371
Qmls.tamu.1D.64	MLS	MET-ADD	1D	64.4468	IWB60722	57.91	53.8692	IWA7525	75.5	66.1993	4.6	8.54	1.82	6.72	5.49	2	3.48	-0.4	TAM 111	Y	73	-0.74	0.31	0.43			86	Qmlt.tamu.1D.419	MLT	HY13	1D	418.626
Qmls.tamu.1D.65	MLS	HY13	1D	65.1478	IWB60722	57.91	53.8692	IWA7525	75.5	66.1993	8.0	10.1			15.2			-1.5	TAM 111	Y	74						87	Qmlt.tamu.5B.424	MLT	ET14	5B	424.314
Qmls.tamu.1D.414	MLS	MET-ADD	1D	413.968	Glu.D1d	113.82	414.3	IWB46866	114.98	412.159	4.6	11.02	3.66	7.37	12.91	4.45	8.46	-0.59	TAM 111	Y	114	0.56	0.6	-1.16			88	Qmlt.tamu.7B.684	MLT	MET-ADD	7B	684.416
Qmls.tamu.1D.414	MLS	ET14	1D	413.968	Glu.D1d	113.82	414.3	IWB46866	114.98	412.159	3.2	14			19.4			-2.5	TAM 111	Y	114						89	Qmlv.tamu.1A.6	MLV	MET-ADD	1A	6.28431
Qmls.tamu.1D.417	MLS	MET-ADD	1D	417.371	IWB57122	115.23	416.405	IWA1559	169.42	484.404	4.6	14.14	8.43	5.71	30.27	10.07	20.2	-0.89	TAM 111	Y	116	0.89	-1.79	0.9			91	Qmlv.tamu.1B.2	MLV	MET-ADD	1B	2.33263
Qmls.tamu.1D.417	MLS	BS14	1D	417.371	IWB57122	115.23	416.405	IWA1559	169.42	484.404	3.2	19			23.2			-4.1	TAM 111	Y	116						92	Qmlw.tamu.1A.6	MLW	MET-ADD	1A	6.28431
Qmlt.tamu.1A.2	MLT	BS14	1A	2.37821	IWB12147	0	2.37821	IWB7628	1.57	3.11837	3.2	9			7.1			-0.4	TAM 111	Y	0						93	Qmlw.tamu.1D.417	MLW	MET-ADD	1D	417.371
Qmlt.tamu.1A.3	MLT	ET14	1A	2.84965	IWB12147	0	2.37821	IWB7628	1.57	3.11837	3.2	8.9			6.7			-0.4	TAM 111	Y	1						94	Qmmst.tamu.1B.2	MMST	MET-ADD	1B	2.33263
Qmlt.tamu.1A.74	MLT	MET-ADD	1A	73.5721	IWB6583	47.85	48.591	IWB50984	104.01	74.0296	4.6	7.9	4.56	3.34	2.95	2.05	0.9	-0.16	TAM 111		103	0.15	-0.07	-0.08			96	Qmmst.tamu.1B.8	MMST	MET-ADD	1B	8.18249
Qmlt.tamu.1B.5	MLT	MET-ADD	1B	4.54104	IWB11290	0.25	4.34957	IWB59268	2.01	4.79887	4.6	47.43	46.83	0.6	27.24	25.49	1.74	0.58	CO960293-2	Y	1	0.21	-0.15	-0.06			97	Qmmst.tamu.1B.541	MMST	BS14	1B	540.7
Qmlt.tamu.1B.5	MLT	BS14, ET14, HY13	1B	4.54104	IWB11290	0.25	4.34957	IWB59268	2.01	4.79887	3.2-8.0	20.6~24.6			20.1~21.9			0.6~0.8	CO960293-2	Y	1						98	Qmmst.tamu.1D.76	MMST	MET-ADD	1D	76.0611
Qmlt.tamu.1D.1	MLT	MET-ADD	1D	1.12288	IWB6058	1.27	0.791411	IWB14030	16.78	7.83407	4.6	7.92	7.55	0.37	4.32	3.4	0.92	-0.21	TAM 111	Y	2	-0.15	0.12	0.03			100	Qmmst.tamu.1D.417	MMST	MET-ADD	1D	417.371
Qmlt.tamu.1D.1	MLT	ET14	1D	1.12288	IWB6058	1.27	0.791411	IWB14030	16.78	7.83407	3.2	4.8			3.6			-0.3	TAM 111	Y	2						102	Qmmst.tamu.1D.424	MMST	HY13	1D	423.645
Qmlt.tamu.1D.2	MLT	BS14	1D	1.57696	IWB6058	1.27	0.791411	IWB14030	16.78	7.83407	3.2	5			4.2			-0.3	TAM 111	Y	3						103	Qmpi.tamu.1A.3	MPI	ET14	1A	2.84965
Qmlt.tamu.1D.289	MLT	ET14	1D	412.752	IWA5577	112.65	412.091	Glu.D1d	113.82	414.3	3.2	27.6			25.6			0.8	CO960293-2	Y	113						104	Qmpi.tamu.1A.4	MPI	BS14	1A	4.18904
Qmlt.tamu.1D.414	MLT	MET-ADD	1D	413.968	Glu.D1d	113.82	414.3	IWB46866	114.98	412.159	4.6	19.15	7	12.15	10.23	3.24	6.99	0.21	CO960293-2	Y	114	-0.21	-0.21	0.43			105	Qmpi.tamu.1A.5	MPI	MET-ADD	1A	4.88747
Qmlt.tamu.1D.417	MLT	MET-ADD	1D	417.371	IWB57122	115.23	416.405	IWA1559	169.42	484.404	4.6	48.12	38.05	10.07	30.81	19.74	11.07	0.51	CO960293-2	Y	116	0.44	0.04	-0.48			106	Qmpi.tamu.1B.5	MPI	MET-ADD	1B	4.54104
Qmlt.tamu.1D.417	MLT	BS14	1D	417.371	IWB57122	115.23	416.405	IWA1559	169.42	484.404	3.2	28.9			30.1			0.8	CO960293-2	Y	116						108	Qmpi.tamu.1B.303	MPI	BS14	1B	302.777
Qmlt.tamu.1D.419	MLT	HY13	1D	418.626	IWB57122	115.23	416.405	IWA1559	169.42	484.404	8.0	28.8			34.2			1	CO960293-2		117						109	Qmpi.tamu.1D.1	MPI	BS14	1D	0.739904
Qmlt.tamu.5B.424	MLT	ET14	5B	424.314	IWB9055	50.76	421.644	IWB42727	52.01	424.336	3.2	4.6			3.3			0.3	CO960293-2	Y	52						110	Qmpi.tamu.1D.1	MPI	MET-ADD	1D	1.12288
Qmlt.tamu.7B.684	MLT	MET-ADD	7B	684.416	IWB7845	136.49	684.397	IWB27553	137.32	684.429	4.6	4.65	4.58	0.07	2.06	2	0.06	-0.16	TAM 111		137	-0.03	0.04	-0.01			112	Qmpi.tamu.1D.64	MPI	HY13	1D	63.7459
Qmlv.tamu.1A.6	MLV	MET-ADD	1A	6.28431	IWB13355	1.82	4.06333	IWB12354	5.53	6.65448	4.6	6.54	4.68	1.86	5.63	4.8	0.83	-0.88	TAM 111	Y	5	0.52	-0.31	-0.21			113	Qmpi.tamu.1D.65	MPI	BS14	1D	65.1478
Qmlv.tamu.1A.6	MLV	ET14	1A	6.28431	IWB13355	1.82	4.06333	IWB12354	5.53	6.65448	3.2	4.9			9.9			-1.3	TAM 111	Y	5						114	Qmpi.tamu.1D.66	MPI	MET-ADD	1D	65.8488
Qmlv.tamu.1B.2	MLV	MET-ADD	1B	2.33263	IWB9291	0	2.33263	IWB74219	0.25	4.34602	4.6	5.39	2.67	2.72	5.07	2.85	2.23	-0.68	TAM 111	Y	0	-0.83	0.24	0.59			115	Qmpi.tamu.1D.413	MPI	MET-ADD	1D	412.752
Qmlw.tamu.1A.6	MLW	MET-ADD	1A	6.28431	IWB13355	1.82	4.06333	IWB12354	5.53	6.65448	4.6	6.4	6.3	0.1	5.62	5.5	0.12	-1.47	TAM 111	Y	5	-0.31	0.13	0.18			117	Qmpi.tamu.3B.751	MPI	MET-ADD	3B	751.295
Qmlw.tamu.1D.417	MLW	MET-ADD	1D	417.371	IWB57122	115.23	416.405	IWA1559	169.42	484.404	4.6	6.81	5.85	0.95	6.04	5.1	0.94	-1.41	TAM 111	Y	116	-0.85	0.56	0.29			118	Qmpi.tamu.5B.424	MPI	ET14	5B	424.314
Qmmst.tamu.1B.2	MMST	MET-ADD	1B	2.33263	IWB9291	0	2.33263	IWB74219	0.25	4.34602	4.6	6	3.54	2.45	9.1	3.68	5.42	-1.7	TAM 111	Y	0	-2.91	1.43	1.49			119	Qmpt.tamu.1A.2	MPT	BS14	1A	2.37821
Qmmst.tamu.1B.2	MMST	BS14	1B	2.33263	IWB9291	0	2.33263	IWB74219	0.25	4.34602	3.2	7.9			9.7			-5.6	TAM 111	Y	0						120	Qmpt.tamu.1A.3	MPT	MET-ADD	1A	2.84965
Qmmst.tamu.1B.8	MMST	MET-ADD	1B	8.18249	IWB47982	2.75	7.99406	IWB9566	3.5	8.55935	4.6	7.31	4.05	3.25	6.05	4.23	1.81	-1.81	TAM 111	Y	3	1.67	-0.74	-0.93			122	Qmpt.tamu.1B.5	MPT	MET-ADD	1B	4.54104
Qmmst.tamu.1B.541	MMST	BS14	1B	540.7	IWB21121	73.5	484.889	IWB11472	78.36	545.165	3.2	3.4			4			-3.6	TAM 111		78						124	Qmpt.tamu.1D.1	MPT	MET-ADD	1D	1.12288
Qmmst.tamu.1D.76	MMST	MET-ADD	1D	76.0611	IWB9742	76.24	75.8584	IWB65387	93.44	80.4454	4.6	5.29	1.76	3.52	5.33	1.72	3.6	-1.16	TAM 111		77	0.97	1.39	-2.35			125	Qmpt.tamu.1D.2	MPT	BS14	1D	1.57696
Qmmst.tamu.1D.76	MMST	ET14	1D	76.0611	IWB9742	76.24	75.8584	IWB65387	93.44	80.4454	3.2	6.4			12.5			-4.7	TAM 111		77						126	Qmpt.tamu.1D.413	MPT	MET-ADD	1D	412.752
Qmmst.tamu.1D.417	MMST	MET-ADD	1D	417.371	IWB57122	115.23	416.405	IWA1559	169.42	484.404	4.6	16.62	11.81	4.81	20.05	12.32	7.72	-3.1	TAM 111	Y	116	-2.97	-0.07	3.04			128	Qmpt.tamu.1D.417	MPT	MET-ADD	1D	417.371
Qmmst.tamu.1D.417	MMST	BS14	1D	417.371	IWB57122	115.23	416.405	IWA1559	169.42	484.404	3.2	14.3			19.9			-8	TAM 111	Y	116						130	Qmpt.tamu.1D.419	MPT	HY13	1D	418.626
Qmmst.tamu.1D.424	MMST	HY13	1D	423.645	IWB57122	115.23	416.405	IWA1559	169.42	484.404	8.0	8.9			16.7			-5.2	TAM 111		121						131	Qmpt.tamu.5B.424	MPT	MET-ADD	5B	424.314
Qmpi.tamu.1A.3	MPI	ET14	1A	2.84965	IWB12147	0	2.37821	IWB7628	1.57	3.11837	3.2	11.5			9.1			-15.9	TAM 111	Y	1						133	Qmpt.tamu.5B.685	MPT	MET-ADD	5B	684.561
Qmpi.tamu.1A.4	MPI	BS14	1A	4.18904	IWB13355	1.82	4.06333	IWB12354	5.53	6.65448	3.2	14			10.6			-17.3	TAM 111	Y	2						134	Qmpv.tamu.1B.2	MPV	MET-ADD	1B	2.33263
Qmpi.tamu.1A.5	MPI	MET-ADD	1A	4.88747	IWB13355	1.82	4.06333	IWB12354	5.53	6.65448	4.6	14.02	10.71	3.31	6.74	5.12	1.63	-9.28	TAM 111	Y	3	-3.14	-4.24	7.38			136	Qmpv.tamu.1B.15	MPV	MET-ADD	1B	15.3556
Qmpi.tamu.1B.5	MPI	MET-ADD	1B	4.54104	IWB11290	0.25	4.34957	IWB59268	2.01	4.79887	4.6	43.98	40.32	3.66	22.06	21.66	0.4	19.2	CO960293-2	Y	1	-1.08	-2.53	3.61			138	Qmpv.tamu.1B.558	MPV	MET-ADD	1B	558.027
Qmpi.tamu.1B.5	MPI	BS14, ET14, HY13	1B	4.54104	IWB11290	0.25	4.34957	IWB59268	2.01	4.79887	3.2-8.0	9.0~22.0			10.3~19.9			18.4~23.5	CO960293-2	Y	1						139	Qmpv.tamu.1D.66	MPV	MET-ADD	1D	65.8488
Qmpi.tamu.1B.303	MPI	BS14	1B	302.777	IWB9806	66.18	278.687	IWB34685	67.71	323.635	3.2	3.2			2.3			8.1	CO960293-2	Y	67						140	Qmpv.tamu.1D.77	MPV	ET14	1D	76.8611
Qmpi.tamu.1D.1	MPI	BS14	1D	0.739904	IWB3277	0.26	0.615246	IWB9223	1.27	0.785387	3.2	5.7			3.9			-10.5	TAM 111	Y	1						141	Qmpv.tamu.1D.417	MPV	HY13	1D	417.371
Qmpi.tamu.1D.1	MPI	MET-ADD	1D	1.12288	IWB6058	1.27	0.791411	IWB14030	16.78	7.83407	4.6	6.31	4.37	1.94	2.85	2.01	0.84	-5.83	TAM 111	Y	2	-1.38	5.14	-3.77			142	Qmpv.tamu.2B.749	MPV	MET-ADD	2B	748.876
Qmpi.tamu.1D.1	MPI	ET14	1D	1.12288	IWB6058	1.27	0.791411	IWB14030	16.78	7.83407	3.2	4.7			3.6			-10	TAM 111	Y	2						144	Qmpw.tamu.1A.6	MPW	MET-ADD	1A	6.28431
Qmpi.tamu.1D.64	MPI	HY13	1D	63.7459	IWB60722	57.91	53.8692	IWA7525	75.5	66.1993	8.0	14.6			22.9			27.3	CO960293-2	Y	72						145	Qmpw.tamu.1A.70	MPW	ET14	1A	70.4013
Qmpi.tamu.1D.65	MPI	BS14	1D	65.1478	IWB60722	57.91	53.8692	IWA7525	75.5	66.1993	3.2	31.8			30.9			29.7	CO960293-2	Y	74						146	Qmpw.tamu.1A.74	MPW	MET-ADD	1A	73.5721
Qmpi.tamu.1D.66	MPI	MET-ADD	1D	65.8488	IWB60722	57.91	53.8692	IWA7525	75.5	66.1993	4.6	40.72	29.68	11.04	23.46	15.42	8.04	16.18	CO960293-2	Y	75	6.59	9.82	-16.41			147	Qmpw.tamu.1D.1	MPW	MET-ADD	1D	1.12288
Qmpi.tamu.1D.413	MPI	MET-ADD	1D	412.752	IWA5577	112.65	412.091	Glu.D1d	113.82	414.3	4.6	28.58	10.99	17.59	14.57	5.25	9.32	9.43	CO960293-2	Y	113	-9.32	-8.44	17.76			148	Qmpw.tamu.1D.2	MPW	ET14	1D	1.57696
Qmpi.tamu.1D.289	MPI	ET14	1D	412.752	IWA5577	112.65	412.091	Glu.D1d	113.82	414.3	3.2	28.6			27.7			27.7	CO960293-2	Y	113						149	Qmri.tamu.1A.6	MRI	MET-ADD	1A	6.28431
Qmpi.tamu.3B.751	MPI	MET-ADD	3B	751.295	IWB70345	121.36	750.863	IWB23127	123.18	752.091	4.6	5.82	5.12	0.69	2.55	2.34	0.21	-6.36	TAM 111		122	-0.56	-2	2.56			150	Qmri.tamu.1A.9	MRI	ET14	1A	9.04264
Qmpi.tamu.5B.424	MPI	ET14	5B	424.314	IWB9055	50.76	421.644	IWB42727	52.01	424.336	3.2	3.6			2.6			8.5	CO960293-2	Y	52						151	Qmri.tamu.1A.11	MRI	MET-ADD	1A	10.9062
Qmpt.tamu.1A.2	MPT	BS14	1A	2.37821	IWB12147	0	2.37821	IWB7628	1.57	3.11837	3.2	9			7.1			-0.4	TAM 111	Y	0						153	Qmri.tamu.1B.5	MRI	ET14	1B	4.54104
Qmpt.tamu.1A.3	MPT	MET-ADD	1A	2.84965	IWB12147	0	2.37821	IWB7628	1.57	3.11837	4.6	12.81	9.19	3.62	5.24	3.57	1.67	-0.23	TAM 111	Y	1	-0.08	0.22	-0.14			154	Qmri.tamu.1D.66	MRI	MET-ADD	1D	65.8488
Qmpt.tamu.1A.3	MPT	ET14	1A	2.84965	IWB12147	0	2.37821	IWB7628	1.57	3.11837	3.2	8.9			6.7			-0.4	TAM 111	Y	1						156	Qmri.tamu.1D.413	MRI	MET-ADD	1D	412.752
Qmpt.tamu.1B.5	MPT	MET-ADD	1B	4.54104	IWB11290	0.25	4.34957	IWB59268	2.01	4.79887	4.6	59.75	57.21	2.54	28.78	27.7	1.08	0.65	CO960293-2	Y	1	0.14	-0.17	0.03			157	Qmri.tamu.1D.414	MRI	ET14	1D	414
Qmpt.tamu.1B.5	MPT	BS14, ET14, HY13	1B	4.54104	IWB11290	0.25	4.34957	IWB59268	2.01	4.79887	3.2-8.0	14.4~24.6			17.3~21.9			0.5~0.8	CO960293-2	Y	1						158	Qmri.tamu.2B.105	MRI	MET-ADD	2B	105.36
Qmpt.tamu.1D.1	MPT	MET-ADD	1D	1.12288	IWB6058	1.27	0.791411	IWB14030	16.78	7.83407	4.6	11.51	11.18	0.33	4.84	4.3	0.54	-0.26	TAM 111	Y	2	-0.1	0.12	-0.02			159	Qmrs.tamu.1B.8	MRS	MET-ADD	1B	8.18249
Qmpt.tamu.1D.2	MPT	BS14	1D	1.57696	IWB6058	1.27	0.791411	IWB14030	16.78	7.83407	3.2	5			4.2			-0.3	TAM 111	Y	3						161	Qmrs.tamu.1D.66	MRS	MET-ADD	1D	65.8488
Qmpt.tamu.1D.413	MPT	MET-ADD	1D	412.752	IWA5577	112.65	412.091	Glu.D1d	113.82	414.3	4.6	27.59	10.52	17.07	12.01	4.1	7.91	0.25	CO960293-2	Y	113	-0.25	-0.24	0.49			162	Qmrs.tamu.1D.414	MRS	ET14	1D	413.968
Qmpt.tamu.1D.289	MPT	ET14	1D	412.752	IWA5577	112.65	412.091	Glu.D1d	113.82	414.3	3.2	27.6			25.6			0.8	CO960293-2	Y	113						163	Qmrs.tamu.1D.417	MRS	BS14	1D	417.371
Qmpt.tamu.1D.417	MPT	MET-ADD	1D	417.371	IWB57122	115.23	416.405	IWA1559	169.42	484.404	4.6	49.98	40.67	9.31	27.58	17.8	9.78	0.52	CO960293-2	Y	116	0.43	0.07	-0.5			164	Qmrt.tamu.1A.15	MRT	MET-ADD	1A	14.7979
Qmpt.tamu.1D.417	MPT	BS14	1D	417.371	IWB57122	115.23	416.405	IWA1559	169.42	484.404	3.2	28.9			30.1			0.8	CO960293-2	Y	116						165	Qmrt.tamu.1B.5	MRT	MET-ADD	1B	4.54104
Qmpt.tamu.1D.419	MPT	HY13	1D	418.626	IWB57122	115.23	416.405	IWA1559	169.42	484.404	8.0	28.8			34.2			1	CO960293-2	Y	117						167	Qmrt.tamu.1D.73	MRT	MET-ADD	1D	72.7269
Qmpt.tamu.5B.424	MPT	MET-ADD	5B	424.314	IWB9055	50.76	421.644	IWB42727	52.01	424.336	4.6	5.13	3.04	2.09	1.77	1.16	0.61	0.13	CO960293-2	Y	52	-0.07	-0.07	0.14			169	Qmrt.tamu.1D.414	MRT	MET-ADD	1D	413.968
Qmpt.tamu.5B.424	MPT	ET14	5B	424.314	IWB9055	50.76	421.644	IWB42727	52.01	424.336	3.2	4.6			3.3			0.3	CO960293-2	Y	52						171	Qmrt.tamu.5B.424	MRT	MET-ADD	5B	424.314
Qmpt.tamu.5B.685	MPT	MET-ADD	5B	684.561	IWB26719	193.68	684.495	IWB44703	194.24	684.611	4.6	4.81	3.94	0.87	1.63	1.51	0.13	-0.15	TAM 111	Y	194	0.05	0.01	-0.06			173	Qmrv.tamu.1A.74	MRV	MET-ADD	1A	74.0251
Qmpv.tamu.1B.2	MPV	MET-ADD	1B	2.33263	IWB9291	0	2.33263	IWB74219	0.25	4.34602	4.6	9.62	3.86	5.75	10.06	3.8	6.27	-0.8	TAM 111	Y	0	-1.45	0.71	0.74			175	Qmrw.tamu.1A.6	MRW	MET-ADD	1A	6.28431
Qmpv.tamu.1B.2	MPV	HY13	1B	2.33263	IWB9291	0	2.33263	IWB74219	0.25	4.34602	8.0	8.6			11.9			-3.3	TAM 111	Y	0						177	Qmrw.tamu.1B.5	MRW	MET-ADD	1B	4.54104
Qmpv.tamu.1B.15	MPV	MET-ADD	1B	15.3556	IWB7076	3.5	8.5597	IWB10908	4.5	22.1515	4.6	8.52	5.42	3.1	9.12	5.34	3.78	-0.94	TAM 111		4	1	-0.95	-0.05			179	Qmrw.tamu.1B.8	MRW	ET14	1B	8.18249
Qmpv.tamu.1B.15	MPV	BS14	1B	15.3556	IWB7076	3.5	8.5597	IWB10908	4.5	22.1515	3.2	4.9			9.2			-2.2	TAM 111		4						180	Qmrw.tamu.1D.1	MRW	MET-ADD	1D	1.12288
Qmpv.tamu.1B.558	MPV	MET-ADD	1B	558.027	BX7OE.866	80.66	555	IWB8798	81.47	562.211	4.6	4.92	4.91	0.01	5.69	4.75	0.94	-0.9	TAM 111		81	0.1	-0.53	0.43			182	Qmrw.tamu.1D.35	MRW	BS14	1D	34.5856
Qmpv.tamu.1D.66	MPV	MET-ADD	1D	65.8488	IWB60722	57.91	53.8692	IWA7525	75.5	66.1993	4.6	6.81	4.1	2.71	7.12	3.92	3.21	-0.81	TAM 111	Y	75	-0.86	-0.07	0.93			183	Qmrw.tamu.1D.58	MRW	MET-ADD	1D	58.1381
Qmpv.tamu.1D.77	MPV	ET14	1D	76.8611	IWB9742	76.24	75.8584	IWB65387	93.44	80.4454	3.2	3.2			6.4			-1.1	TAM 111	Y	80						184	Qmti.tamu.1B.2	MTI	MET-ADD	1B	2.33263
Qmpv.tamu.1D.417	MPV	HY13	1D	417.371	IWB57122	115.23	416.405	IWA1559	169.42	484.404	8.0	8.9			13			-3.4	TAM 111	Y	116						186	Qmti.tamu.1D.417	MTI	HY13	1B	417.371
Qmpv.tamu.2B.749	MPV	MET-ADD	2B	748.876	IWB7265	125.72	745.719	IWB6323	127.04	748.974	4.6	4.51	2.51	2	3	2.43	0.58	0.63	CO960293-2		127	0.21	-0.44	0.23			187	Qmti.tamu.1D.417	MTI	MET-ADD	1D	417.371
Qmpv.tamu.2B.749	MPV	ET14	2B	748.876	IWB7265	125.72	745.719	IWB6323	127.04	748.974	3.2	3.3			4.7			1	CO960293-2		127						188	Qmti.tamu.5B.686	MTI	MET-ADD	5B	685.625
Qmpw.tamu.1A.6	MPW	MET-ADD	1A	6.28431	IWB13355	1.82	4.06333	IWB12354	5.53	6.65448	4.6	6.06	4.17	1.89	7.14	4.42	2.72	-0.8	TAM 111	Y	5	-0.69	-0.15	0.83			189	Qmts.tamu.1D.64	MTS	MET-ADD	1D	63.7459
Qmpw.tamu.1A.70	MPW	ET14	1A	70.4013	IWB6583	47.85	48.591	IWB50984	104.01	74.0296	3.2	4.4			9			-1.9	TAM 111		96						190	Qmts.tamu.1D.414	MTS	MET-ADD	1D	413.968
Qmpw.tamu.1A.74	MPW	MET-ADD	1A	73.5721	IWB6583	47.85	48.591	IWB50984	104.01	74.0296	4.6	5.06	3.14	1.91	4.6	3.2	1.4	-0.68	TAM 111	Y	103	0.64	-0.26	-0.38			191	Qmtv.tamu.1A.4	MTV	BS14	1A	4.18904
Qmpw.tamu.1D.1	MPW	MET-ADD	1D	1.12288	IWB6058	1.27	0.791411	IWB14030	16.78	7.83407	4.6	4.84	2.37	2.46	3.91	2.45	1.47	-0.6	TAM 111	Y	2	0.53	0.07	-0.6			192	Qmtv.tamu.1A.6	MTV	MET-ADD	1A	5.58589
Qmpw.tamu.1D.2	MPW	ET14	1D	1.57696	IWB6058	1.27	0.791411	IWB14030	16.78	7.83407	3.2	6.5			8			-1.8	TAM 111	Y	3						193	Qmtv.tamu.1A.6	MTV	ET14	1A	6.28431
Qmri.tamu.1A.6	MRI	MET-ADD	1A	6.28431	IWB13355	1.82	4.06333	IWB12354	5.53	6.65448	4.6	10.52	6.14	4.38	6.78	5.21	1.56	-7.68	TAM 111	Y	5	-1.73	5.8	-4.06			194	Qmtv.tamu.1B.5	MTV	MET-ADD	1B	4.54104
Qmri.tamu.1A.9	MRI	ET14	1A	9.04264	IWA3181	5.78	7.18441	IWB29601	18.8	10.1277	3.2	7.5			10			-14.6	TAM 111		14						196	Qmtv.tamu.1D.1	MTV	ET14	1D	1.12288
Qmri.tamu.1A.11	MRI	MET-ADD	1A	10.9062	IWB29601	18.8	10.1277	IWB12589	21.61	11.9506	4.6	5	4.57	0.43	5.46	3.72	1.74	-6.56	TAM 111		20	2.55	-6.31	3.76			197	Qmtv.tamu.1D.64	MTV	BS14	1D	64.4468
Qmri.tamu.1A.11	MRI	BS14	1A	10.9062	IWB29601	18.8	10.1277	IWB12589	21.61	11.9506	3.2	3.9			6			-13.6	TAM 111		20						198	Qmtv.tamu.1D.65	MTV	MET-ADD	1D	65.1478
Qmri.tamu.1B.5	MRI	ET14	1B	4.54104	IWB11290	0.25	4.34957	IWB59268	2.01	4.79887	3.2	11.2			12.4			16.3	CO960293-2	Y	1						199	Qmtv.tamu.1D.413	MTV	MET-ADD	1D	412.752
Qmri.tamu.1D.66	MRI	MET-ADD	1D	65.8488	IWB60722	57.91	53.8692	IWA7525	75.5	66.1993	4.6	10.9	8.23	2.67	12.95	6.91	6.04	8.88	CO960293-2	Y	75	-1.45	10.81	-9.37			201	Qmtw.tamu.1A.2	MTW	ET14	1A	2.37821
Qmri.tamu.1D.66	MRI	BS14	1D	65.8488	IWB60722	57.91	53.8692	IWA7525	75.5	66.1993	3.2	8.7			13.6			20.4	CO960293-2	Y	75						202	Qmtw.tamu.1A.3	MTW	BS14	1A	2.84965
Qmri.tamu.1D.413	MRI	MET-ADD	1D	412.752	IWA5577	112.65	412.091	Glu.D1d	113.82	414.3	4.6	18.6	7.59	11.01	12.32	6.47	5.85	8.58	CO960293-2	Y	113	-2.02	-8.83	10.85			203	Qmtw.tamu.1A.6	MTW	HY13	1A	5.58589
Qmri.tamu.1D.414	MRI	ET14	1D	414	Glu.D1d	113.82	414.3	IWB46866	114.98	412.159	3.2	19.7			23.5			22.4	CO960293-2	Y	113						204	Qmtw.tamu.1A.6	MTW	MET-ADD	1A	6.28431
Qmri.tamu.2B.105	MRI	MET-ADD	2B	105.36	IWB7346	82.24	92.997	IWB47487	90.96	154.251	4.6	5	4.94	0.06	4.63	4	0.63	-6.73	TAM 111		84	0.22	-3.38	3.16			205	Qmtw.tamu.1B.5	MTW	BS14	1B	4.54104
Qmrs.tamu.1B.8	MRS	MET-ADD	1B	8.18249	IWB47982	2.75	7.99406	IWB9566	3.5	8.55935	4.6	12.58	12.09	0.49	14.68	10.99	3.69	0.34	CO960293-2	Y	3	-0.23	-0.01	0.25			206	Qmtw.tamu.1B.8	MTW	MET-ADD	1B	8.18249
Qmrs.tamu.1B.8	MRS	BS14, ET14	1B	8.18249	IWB47982	2.75	7.99406	IWB9566	3.5	8.55935	3.2	5.6			9.5			0.5	CO960293-2	Y	3						208	Qmtw.tamu.1D.1	MTW	BS14	1D	0.550997
Qmrs.tamu.1D.66	MRS	MET-ADD	1D	65.8488	IWB60722	57.91	53.8692	IWA7525	75.5	66.1993	4.6	6.4	5.34	1.06	5.41	4.59	0.82	0.22	CO960293-2	Y	75	0	-0.11	0.12			209	Qmtw.tamu.1D.1	MTW	MET-ADD	1D	0.739904
Qmrs.tamu.1D.414	MRS	ET14	1D	413.968	Glu.D1d	113.82	414.3	IWB46866	114.98	412.159	3.2	157.1			26.9			7.6	CO960293-2	Y	114						211	Qmtw.tamu.1D.76	MTW	MET-ADD	1D	76.0611
Qmrs.tamu.1D.417	MRS	BS14	1D	417.371	IWB57122	115.23	416.405	IWA1559	169.42	484.404	3.2	5.8			10.3			0.5	CO960293-2	Y	116						212	Qmtw.tamu.1D.413	MTW	MET-ADD	1D	412.752
Qmrt.tamu.1A.15	MRT	MET-ADD	1A	14.7979	IWB35395	25.23	14.1437	IWB6520	26.75	15.4351	4.6	5.23	3.78	1.46	4.69	3.44	1.24	-0.15	TAM 111		26	-0.12	0.04	0.08			214	Qmtw.tamu.1D.417	MTW	MET-ADD	1D	417.371
Qmrt.tamu.1B.5	MRT	MET-ADD	1B	4.54104	IWB11290	0.25	4.34957	IWB59268	2.01	4.79887	4.6	19.33	17.34	1.98	18.78	16.13	2.65	0.32	CO960293-2	Y	1	-0.17	0.04	0.13			215	Qmtw.tamu.6D.468	MTW	MET-ADD	6D	467.751
Qmrt.tamu.1B.5	MRT	BS14, ET14	1B	4.54104	IWB11290	0.25	4.34957	IWB59268	2.01	4.79887	3.2	6.3			9.3			0.4	CO960293-2	Y	1						217	Qmtw.tamu.7D.5	MTW	MET-ADD	7D	5.08867
Qmrt.tamu.1D.73	MRT	MET-ADD	1D	72.7269	IWB4265	75.5	66.203	IWB9742	76.24	75.8584	4.6	11.84	4.39	7.45	13.86	4.07	9.78	0.16	CO960293-2	Y	76	-0.18	0.35	-0.17			218	Qmtxi.tamu.1B.2	MTXI	MET-ADD	1B	2.33263
Qmrt.tamu.1D.73	MRT	BS14	1D	72.7269	IWB4265	75.5	66.203	IWB9742	76.24	75.8584	3.2	11.8			18.1			0.5	CO960293-2	Y	76						220	Qmtxi.tamu.1D.417	MTXI	MET-ADD	1D	417.371
Qmrt.tamu.1D.414	MRT	MET-ADD	1D	413.968	Glu.D1d	113.82	414.3	IWB46866	114.98	412.159	4.6	18.68	6.64	12.05	19.56	6.21	13.35	0.2	CO960293-2	Y	114	-0.23	-0.18	0.41			222	Qmtxi.tamu.5B.686	MTXI	MET-ADD	5B	685.625
Qmrt.tamu.1D.414	MRT	ET14	1D	413.968	Glu.D1d	113.82	414.3	IWB46866	114.98	412.159	3.2	18.6			24.3			0.6	CO960293-2	Y	114						223	Qmtxs.tamu.3B.211	MTXS	MET-ADD	3B	211.301
Qmrt.tamu.5B.424	MRT	MET-ADD	5B	424.314	IWB9055	50.76	421.644	IWB42727	52.01	424.336	4.6	5.52	2.95	2.57	4.92	2.71	2.21	0.13	CO960293-2	Y	52	-0.02	-0.13	0.15			224	Qmtxv.tamu.1A.4	MTXV	BS14	1A	4.18904
Qmrt.tamu.5B.424	MRT	ET14	5B	424.314	IWB9055	50.76	421.644	IWB42727	52.01	424.336	3.2	4.8			5.4			0.3	CO960293-2	Y	52						225	Qmtxv.tamu.1A.6	MTXV	MET-ADD	1A	5.58589
Qmrv.tamu.1A.74	MRV	MET-ADD	1A	74.0251	IWB6583	47.85	48.591	IWB50984	104.01	74.0296	4.6	8.15	6.82	1.33	6.06	5.65	0.41	-0.77	TAM 111		104	0.25	0.01	-0.26			226	Qmtxv.tamu.1A.6	MTXV	ET14	1A	6.28431
Qmrv.tamu.1A.74	MRV	ET14	1A	74.0251	IWB6583	47.85	48.591	IWB50984	104.01	74.0296	3.2	4.3			9			-1	TAM 111		104						227	Qmtxv.tamu.1B.5	MTXV	MET-ADD	1B	4.54104
Qmrw.tamu.1A.6	MRW	MET-ADD	1A	6.28431	IWB13355	1.82	4.06333	IWB12354	5.53	6.65448	4.6	6.13	5.78	0.34	7.09	5.97	1.12	-0.77	TAM 111	Y	5	0.23	0.24	-0.47			229	Qmtxv.tamu.1D.1	MTXV	MET-ADD	1D	1.12288
Qmrw.tamu.1A.6	MRW	ET14	1A	6.28431	IWB13355	1.82	4.06333	IWB12354	5.53	6.65448	3.2	3.8			6.4			-1.3	TAM 111	Y	5						231	Qmtxv.tamu.1D.64	MTXV	BS14	1D	64.4468
Qmrw.tamu.1B.5	MRW	MET-ADD	1B	4.54104	IWB11290	0.25	4.34957	IWB59268	2.01	4.79887	4.6	6.41	3.25	3.16	6.98	3.4	3.58	0.58	CO960293-2	Y	1	-0.22	0.82	-0.6			232	Qmtxv.tamu.1D.65	MTXV	MET-ADD	1D	65.1478
Qmrw.tamu.1B.5	MRW	BS14	1B	4.54104	IWB11290	0.25	4.34957	IWB59268	2.01	4.79887	3.2	6.1			11.8			1.5	CO960293-2	Y	1						233	Qmtxv.tamu.1D.289	MTXV	ET14	1D	412.752
Qmrw.tamu.1B.8	MRW	ET14	1B	8.18249	IWB47982	2.75	7.99406	IWB9566	3.5	8.55935	3.2	3.4			5.6			1.2	CO960293-2	Y	3						234	Qmtxw.tamu.1A.2	MTXW	ET14	1A	2.37821
Qmrw.tamu.1D.1	MRW	MET-ADD	1D	1.12288	IWB6058	1.27	0.791411	IWB14030	16.78	7.83407	4.6	7.88	6.98	0.9	9.8	7.14	2.67	-0.84	TAM 111	Y	2	0.42	0.31	-0.73			235	Qmtxw.tamu.1A.3	MTXW	BS14	1A	2.84965
Qmrw.tamu.1D.1	MRW	ET14	1D	1.12288	IWB6058	1.27	0.791411	IWB14030	16.78	7.83407	3.2	6.1			10.6			-1.6	TAM 111	Y	2						236	Qmtxw.tamu.1A.6	MTXW	HY13	1A	5.58589
Qmrw.tamu.1D.35	MRW	BS14	1D	34.5856	IWB25219	49.78	33.7564	IWB9563	51.06	38.581	3.2	3.3			6.1			1.1	CO960293-2		50						237	Qmtxw.tamu.1A.6	MTXW	MET-ADD	1A	6.28431
Qmrw.tamu.1D.58	MRW	MET-ADD	1D	58.1381	IWB60722	57.91	53.8692	IWA7525	75.5	66.1993	4.6	4.79	4.02	0.77	4.25	3.67	0.58	0.6	CO960293-2		64	-0.13	0.34	-0.21			238	Qmtxw.tamu.1B.5	MTXW	BS14	1B	4.54104
Qmti.tamu.1B.2	MTI	MET-ADD	1B	2.33263	IWB9291	0	2.33263	IWB74219	0.25	4.34602	4.6	13.89	10.94	2.95	28.7	12.72	15.98	-9.85	TAM 111	Y	0	-15.44	9.69	5.75			239	Qmtxw.tamu.1B.8	MTXW	MET-ADD	1B	8.18249
Qmti.tamu.1B.2	MTI	HY13	1B	2.33263	IWB9291	0	2.33263	IWB74219	0.25	4.34602	8.0	8.9			11.9			-24.6	TAM 111	Y	0						241	Qmtxw.tamu.1D.1	MTXW	BS14	1D	0.550997
Qmti.tamu.1D.417	MTI	HY13	1B	417.371	IWB57122	115.23	416.405	IWA1559	169.42	484.404	8.0	11			15.9			-28.4	TAM 111	Y	116						242	Qmtxw.tamu.1D.1	MTXW	MET-ADD	1D	0.739904
Qmti.tamu.1D.417	MTI	MET-ADD	1D	417.371	IWB57122	115.23	416.405	IWA1559	169.42	484.404	4.6	14.23	10.48	3.75	30.15	11.82	18.33	-9.46	TAM 111	Y	116	-16.46	6.02	10.44			244	Qmtxw.tamu.1D.76	MTXW	MET-ADD	1D	76.0611
Qmti.tamu.5B.686	MTI	MET-ADD	5B	685.625	IWB1968	196.28	685.432	IWB21455	198.12	685.638	4.6	6.16	3.16	3.01	6.08	3.53	2.55	5.16	CO960293-2	Y	198	-0.2	5.46	-5.26			245	Qmtxw.tamu.1D.413	MTXW	MET-ADD	1D	412.752
Qmts.tamu.1D.64	MTS	MET-ADD	1D	63.7459	IWB60722	57.91	53.8692	IWA7525	75.5	66.1993	4.6	4.75	0	4.74	324.43	0.26	324.17	0	CO960293-2	Y	72	0.16	-0.09	-0.07			247	Qmtxw.tamu.1D.417	MTXW	MET-ADD	1D	417.371
Qmts.tamu.1D.414	MTS	MET-ADD	1D	413.968	Glu.D1d	113.82	414.3	IWB46866	114.98	412.159	4.6	4.75	0.06	4.69	408.77	4.33	404.43	0.01	CO960293-2	Y	114	0.18	-0.1	-0.08			248	Qmtxw.tamu.6D.468	MTXW	ET14	6D	467.751
Qmtv.tamu.1A.4	MTV	BS14	1A	4.18904	IWB13355	1.82	4.06333	IWB12354	5.53	6.65448	3.2	6.7			7.7			-1.6	TAM 111	Y	2						249	Qskw.tamu.2A.643	SKW	ET14	2A	642.793
Qmtv.tamu.1A.6	MTV	MET-ADD	1A	5.58589	IWB13355	1.82	4.06333	IWB12354	5.53	6.65448	4.6	14.53	13.67	0.86	14.43	14.02	0.41	-1.11	TAM 111	Y	4	0.22	-0.24	0.02			250	Qskw.tamu.2B.65	SKW	ET14	2B	64.6157
Qmtv.tamu.1A.6	MTV	ET14	1A	6.28431	IWB13355	1.82	4.06333	IWB12354	5.53	6.65448	3.2	7.3			10.5			-1.2	TAM 111	Y	5						251	Qskw.tamu.3A.515	SKW	MET-ADD	3A	515.195
Qmtv.tamu.1B.5	MTV	MET-ADD	1B	4.54104	IWB11290	0.25	4.34957	IWB59268	2.01	4.79887	4.6	5.79	1.23	4.56	7.4	1.16	6.24	0.32	CO960293-2	Y	1	-0.65	1.04	-0.39			252	Qskw.tamu.5A.44	SKW	MET-ADD	5A	44.1726
Qmtv.tamu.1B.5	MTV	BS14	1B	4.54104	IWB11290	0.25	4.34957	IWB59268	2.01	4.79887	3.2	6.3			7.4			1.6	CO960293-2	Y	1						253	Qskw.tamu.5A.606	SKW	BS14	5A	606.471
Qmtv.tamu.1D.1	MTV	ET14	1D	1.12288	IWB6058	1.27	0.791411	IWB14030	16.78	7.83407	3.2	3.9			5.5			-0.9	TAM 111	Y	2						254	Qskw.tamu.5A.609	SKW	MET-ADD	5A	608.531
Qmtv.tamu.1D.64	MTV	BS14	1D	64.4468	IWB60722	57.91	53.8692	IWA7525	75.5	66.1993	3.2	10.7			15.7			2.3	CO960293-2	Y	73						255	Qskw.tamu.5A.644	SKW	MET-ADD	5A	644.109
Qmtv.tamu.1D.65	MTV	MET-ADD	1D	65.1478	IWB60722	57.91	53.8692	IWA7525	75.5	66.1993	4.6	9.05	4.88	4.18	11.47	4.58	6.89	0.64	CO960293-2	Y	74	-0.48	1.1	-0.62			257	Qskw.tamu.6A.608	SKW	MET-ADD	6A	608.008
Qmtv.tamu.1D.413	MTV	MET-ADD	1D	412.752	IWA5577	112.65	412.091	Glu.D1d	113.82	414.3	4.6	4.68	1.56	3.12	3.35	1.62	1.72	0.38	CO960293-2	Y	113	-0.21	-0.34	0.55			258	Qskw.tamu.6B.114	SKW	ET14	6B	114.17
Qmtv.tamu.1D.289	MTV	ET14	1D	412.752	IWA5577	112.65	412.091	Glu.D1d	113.82	414.3	3.2	3.2			4.4			0.8	CO960293-2	Y	113						259	Qskw.tamu.7A.662	SKW	ET14	7A	661.548
Qmtw.tamu.1A.2	MTW	ET14	1A	2.37821	IWB12147	0	2.37821	IWB7628	1.57	3.11837	3.2	5.4			5.7			-1.3	TAM 111	Y	0						260	Qskw.tamu.7A.664	SKW	MET-ADD	7A	664.308
Qmtw.tamu.1A.3	MTW	BS14	1A	2.84965	IWB12147	0	2.37821	IWB7628	1.57	3.11837	3.2	5.5			6.9			-1.4	TAM 111	Y	1						261	Qwab.tamu.1A.514	WAB	MET-ADD	1A	513.664
Qmtw.tamu.1A.6	MTW	HY13	1A	5.58589	IWB13355	1.82	4.06333	IWB12354	5.53	6.65448	8.0	8.4			9.3			-2.2	TAM 111	Y	4						263	Qwab.tamu.3B.691	WAB	BS14	3B	691.33
Qmtw.tamu.1A.6	MTW	MET-ADD	1A	6.28431	IWB13355	1.82	4.06333	IWB12354	5.53	6.65448	4.6	8.04	3.35	4.69	9.13	3.02	6.11	-0.52	TAM 111	Y	5	-1.05	0.57	0.48			264	Qwab.tamu.3B.693	WAB	MET-ADD	3B	693.231
Qmtw.tamu.1B.5	MTW	BS14	1B	4.54104	IWB11290	0.25	4.34957	IWB59268	2.01	4.79887	3.2	12.3			16.6			2.2	CO960293-2	Y	1						265	Qwab.tamu.5B.371	WAB	MET-ADD	5B	371.307
Qmtw.tamu.1B.8	MTW	MET-ADD	1B	8.18249	IWB47982	2.75	7.99406	IWB9566	3.5	8.55935	4.6	28.31	22.13	6.18	33.9	21.71	12.19	1.4	CO960293-2	Y	3	0.25	-1.39	1.14			267	Qwab.tamu.5B.522	WAB	ET14	5B	522.07
Qmtw.tamu.1B.8	MTW	ET14	1B	8.18249	IWB47982	2.75	7.99406	IWB9566	3.5	8.55935	3.2	19.1			24			2.6	CO960293-2	Y	3						268	Qwab.tamu.5B.680	WAB	MET-ADD	5B	679.768
Qmtw.tamu.1D.1	MTW	BS14	1D	0.550997	IWB65713	0	0.550997	IWB74218	0.26	0.578135	3.2	7.2			8.9			-1.6	TAM 111	Y	0						270	Qwab.tamu.7D.118	WAB	ET14	7D	117.992
Qmtw.tamu.1D.1	MTW	MET-ADD	1D	0.739904	IWB3277	0.26	0.615246	IWB9223	1.27	0.785387	4.6	9.19	7.04	2.16	9.77	6.52	3.26	-0.77	TAM 111	Y	1	-0.26	0.75	-0.5
Qmtw.tamu.1D.1	MTW	ET14	1D	0.739904	IWB3277	0.26	0.615246	IWB9223	1.27	0.785387	3.2	6.5			6.9			-1.4	TAM 111	Y	1
Qmtw.tamu.1D.76	MTW	MET-ADD	1D	76.0611	IWB9742	76.24	75.8584	IWB65387	93.44	80.4454	4.6	5.65	2.46	3.19	6.1	2.14	3.96	0.44	CO960293-2	Y	77	0.84	-0.4	-0.44
Qmtw.tamu.1D.413	MTW	MET-ADD	1D	412.752	IWA5577	112.65	412.091	Glu.D1d	113.82	414.3	4.6	9.07	3.33	5.74	9.7	3.07	6.63	0.53	CO960293-2	Y	113	-0.58	-0.51	1.09
Qmtw.tamu.1D.289	MTW	BS14, ET14	1D	412.752	IWA5577	112.65	412.091	Glu.D1d	113.82	414.3	3.2	10.4			13.6			2	CO960293-2	Y	113
Qmtw.tamu.1D.417	MTW	MET-ADD	1D	417.371	IWB57122	115.23	416.405	IWA1559	169.42	484.404	4.6	6.8	1.66	5.14	4.73	1.48	3.25	0.37	CO960293-2	Y	116	-0.39	0.76	-0.38
Qmtw.tamu.6D.468	MTW	MET-ADD	6D	467.751	IWB7256	153.49	467.188	IWB25019	156.92	470.977	4.6	5.29	3.33	1.97	5.05	2.96	2.09	-0.52	TAM 111		154	0.43	0.16	-0.59
Qmtw.tamu.6D.468	MTW	ET14	6D	467.751	IWB7256	153.49	467.188	IWB25019	156.92	470.977	3.2	3.7			4			-1.1	TAM 111		154
Qmtw.tamu.7D.5	MTW	MET-ADD	7D	5.08867	IWB72285	0	5.08867	IWB34246	0.25	5.16714	4.6	5.19	0.47	4.72	5.67	0.42	5.25	-0.19	TAM 111		0	-0.94	0.25	0.69
Qmtxi.tamu.1B.2	MTXI	MET-ADD	1B	2.33263	IWB9291	0	2.33263	IWB74219	0.25	4.34602	4.6	13.24	10.19	3.05	25.59	10.62	14.97	-9.47	TAM 111	Y	0	-15.82	9.31	6.51
Qmtxi.tamu.1B.2	MTXI	HY13	1B	2.33263	IWB9291	0	2.33263	IWB74219	0.25	4.34602	8.0	8.9			11.9			-24.6	TAM 111	Y	0
Qmtxi.tamu.1D.417	MTXI	MET-ADD	1D	417.371	IWB57122	115.23	416.405	IWA1559	169.42	484.404	4.6	15.2	13.89	1.31	27.66	14.26	13.4	-10.94	TAM 111	Y	116	-14.99	7.49	7.5
Qmtxi.tamu.1D.417	MTXI	HY13	1D	417.371	IWB57122	115.23	416.405	IWA1559	169.42	484.404	8.0	11			15.9			-28.4	TAM 111	Y	116
Qmtxi.tamu.5B.686	MTXI	MET-ADD	5B	685.625	IWB1968	196.28	685.432	IWB21455	198.12	685.638	4.6	6.16	3.23	2.93	5.49	3.25	2.24	5.21	CO960293-2	Y	198	-0.25	5.42	-5.17
Qmtxs.tamu.3B.211	MTXS	MET-ADD	3B	211.301	IWB14070	55.59	206.193	IWB44271	56.08	212.298	4.6	5.22	0.28	4.94	10.71	1.6	9.11	0.02	CO960293-2		56	-0.01	-0.05	0.05
Qmtxv.tamu.1A.4	MTXV	BS14	1A	4.18904	IWB13355	1.82	4.06333	IWB12354	5.53	6.65448	3.2	6.6			7.6			-1.6	TAM 111	Y	2
Qmtxv.tamu.1A.6	MTXV	MET-ADD	1A	5.58589	IWB13355	1.82	4.06333	IWB12354	5.53	6.65448	4.6	15.04	14.25	0.79	15.14	14.9	0.24	-1.15	TAM 111	Y	4	0.15	-0.2	0.05
Qmtxv.tamu.1A.6	MTXV	ET14	1A	6.28431	IWB13355	1.82	4.06333	IWB12354	5.53	6.65448	3.2	7.3			10.5			-1.2	TAM 111	Y	5
Qmtxv.tamu.1B.5	MTXV	MET-ADD	1B	4.54104	IWB11290	0.25	4.34957	IWB59268	2.01	4.79887	4.6	5.76	1.26	4.49	7.37	1.2	6.17	0.33	CO960293-2	Y	1	-0.67	1.03	-0.37
Qmtxv.tamu.1B.5	MTXV	BS14	1B	4.54104	IWB11290	0.25	4.34957	IWB59268	2.01	4.79887	3.2	6.3			7.4			1.6	CO960293-2	Y	1
Qmtxv.tamu.1D.1	MTXV	MET-ADD	1D	1.12288	IWB6058	1.27	0.791411	IWB14030	16.78	7.83407	4.6	6.5	4.43	2.08	5.95	4.48	1.47	-0.63	TAM 111	Y	2	0.51	-0.3	-0.21
Qmtxv.tamu.1D.1	MTXV	ET14	1D	1.12288	IWB6058	1.27	0.791411	IWB14030	16.78	7.83407	3.2	3.8			5.5			-0.9	TAM 111	Y	2
Qmtxv.tamu.1D.64	MTXV	BS14	1D	64.4468	IWB60722	57.91	53.8692	IWA7525	75.5	66.1993	3.2	10.7			15.7			2.3	CO960293-2	Y	73
Qmtxv.tamu.1D.65	MTXV	MET-ADD	1D	65.1478	IWB60722	57.91	53.8692	IWA7525	75.5	66.1993	4.6	8.96	4.28	4.68	11.38	4.08	7.3	0.6	CO960293-2	Y	74	-0.56	1.14	-0.58
Qmtxv.tamu.1D.289	MTXV	ET14	1D	412.752	IWA5577	112.65	412.091	Glu.D1d	113.82	414.3	3.2	3.2			4.4			0.8	CO960293-2	Y	113
Qmtxw.tamu.1A.2	MTXW	ET14	1A	2.37821	IWB12147	0	2.37821	IWB7628	1.57	3.11837	3.2	5.4			5.7			-1.3	TAM 111	Y	0
Qmtxw.tamu.1A.3	MTXW	BS14	1A	2.84965	IWB12147	0	2.37821	IWB7628	1.57	3.11837	3.2	5.5			6.9			-1.4	TAM 111	Y	1
Qmtxw.tamu.1A.6	MTXW	HY13	1A	5.58589	IWB13355	1.82	4.06333	IWB12354	5.53	6.65448	8.0	8.4			9.3			-2.2	TAM 111	Y	4
Qmtxw.tamu.1A.6	MTXW	MET-ADD	1A	6.28431	IWB13355	1.82	4.06333	IWB12354	5.53	6.65448	4.6	11.55	8.65	2.9	10.89	7.48	3.41	-0.84	TAM 111	Y	5	-0.73	0.07	0.66
Qmtxw.tamu.1B.5	MTXW	BS14	1B	4.54104	IWB11290	0.25	4.34957	IWB59268	2.01	4.79887	3.2	12.3			16.6			2.2	CO960293-2	Y	1
Qmtxw.tamu.1B.8	MTXW	MET-ADD	1B	8.18249	IWB47982	2.75	7.99406	IWB9566	3.5	8.55935	4.6	24.08	19.22	4.86	26.35	17.34	9.02	1.29	CO960293-2	Y	3	0.36	-1.27	0.92
Qmtxw.tamu.1B.8	MTXW	ET14	1B	8.18249	IWB47982	2.75	7.99406	IWB9566	3.5	8.55935	3.2	19.1			24			2.6	CO960293-2	Y	3
Qmtxw.tamu.1D.1	MTXW	BS14	1D	0.550997	IWB65713	0	0.550997	IWB74218	0.26	0.578135	3.2	7.2			8.9			-1.6	TAM 111	Y	0
Qmtxw.tamu.1D.1	MTXW	MET-ADD	1D	0.739904	IWB3277	0.26	0.615246	IWB9223	1.27	0.785387	4.6	7.9	6.24	1.67	7.89	5.35	2.54	-0.72	TAM 111	Y	1	-0.31	0.7	-0.39
Qmtxw.tamu.1D.1	MTXW	ET14	1D	0.739904	IWB3277	0.26	0.615246	IWB9223	1.27	0.785387	3.2	6.5			6.9			-1.4	TAM 111	Y	1
Qmtxw.tamu.1D.76	MTXW	MET-ADD	1D	76.0611	IWB9742	76.24	75.8584	IWB65387	93.44	80.4454	4.6	5.66	2.38	3.28	5.74	1.92	3.82	0.43	CO960293-2	Y	77	0.85	-0.39	-0.47
Qmtxw.tamu.1D.413	MTXW	MET-ADD	1D	412.752	IWA5577	112.65	412.091	Glu.D1d	113.82	414.3	4.6	7.49	2.78	4.71	7.44	2.37	5.07	0.48	CO960293-2	Y	113	-0.53	-0.45	0.99
Qmtxw.tamu.1D.289	MTXW	BS14, ET14	1D	412.752	IWA5577	112.65	412.091	Glu.D1d	113.82	414.3	3.2	10.4			13.6			2	CO960293-2	Y	113
Qmtxw.tamu.1D.417	MTXW	MET-ADD	1D	417.371	IWB57122	115.23	416.405	IWA1559	169.42	484.404	4.6	5.88	1.34	4.53	3.57	1.11	2.46	0.33	CO960293-2	Y	116	-0.35	0.69	-0.34
Qmtxw.tamu.6D.468	MTXW	ET14	6D	467.751	IWB7256	153.49	467.188	IWB25019	156.92	470.977	3.2	3.7			4			-1.1	TAM 111	Y	154
Qskw.tamu.2A.643	SKW	ET14	2A	642.793	IWB40575	166.37	507.691	IWB64705	174.29	647.928	3.2	4			4.9			0.5	CO960293-2		174
Qskw.tamu.2B.65	SKW	ET14	2B	64.6157	IWB3178	62.79	58.9794	IWB8143	64.08	64.9883	3.2	5.6			7			-0.7	TAM 111	Y	64
Qskw.tamu.3A.515	SKW	MET-ADD	3A	515.195	IWB70483	64.05	249.855	IWB34921	128.17	515.9	4.6	4.97	4.45	0.52	6.16	4.58	1.58	-0.31	TAM 111		128	0.23	-0.02	-0.21
Qskw.tamu.5A.44	SKW	MET-ADD	5A	44.1726	IWB59634	15.76	29.8925	IWB7718	28.62	46.2307	4.6	6.7	2.99	3.71	8.34	2.92	5.42	0.25	CO960293-2		27	-0.24	0.48	-0.23
Qskw.tamu.5A.606	SKW	BS14	5A	606.471	IWB72362	132.26	598.905	IWB15978	138.37	606.959	3.2	4.2			9.1			-0.6	TAM 111		138
Qskw.tamu.5A.609	SKW	MET-ADD	5A	608.531	IWB15978	138.37	606.959	IWB8292	140.69	609.196	4.6	5.83	5.03	0.8	7.29	5.17	2.12	-0.33	TAM 111	Y	140	0.28	-0.22	-0.06
Qskw.tamu.5A.644	SKW	MET-ADD	5A	644.109	IWB48788	156.77	643.623	IWB68078	158.54	647.365	4.6	9.03	5.39	3.64	7.19	5.59	1.6	-0.34	TAM 111		157	-0.19	0.25	-0.07
Qskw.tamu.5A.644	SKW	ET14	5A	644.109	IWB48788	156.77	643.623	IWB68078	158.54	647.365	3.2	4.5			5.5			-0.6	TAM 111		157
Qskw.tamu.6A.608	SKW	MET-ADD	6A	608.008	IWB74002	147.48	606.99	IWA2579	154.42	608.073	4.6	4.6	3.38	1.22	3.69	3.45	0.24	0.28	CO960293-2		154	0.08	-0.09	0.01
Qskw.tamu.6B.114	SKW	ET14	6B	114.17	IWB9751	85.33	113.453	IWB35509	87.46	114.367	3.2	4.2			5.3			-0.6	TAM 111		87
Qskw.tamu.7A.662	SKW	ET14	7A	661.548	IWA614	165.25	660.465	IWA4196	173.72	663.802	3.2	3.7			4.9			0.5	CO960293-2		168
Qskw.tamu.7A.664	SKW	MET-ADD	7A	664.308	IWA4196	173.72	663.802	IWB35861	177	669.729	4.6	8.62	4.29	4.32	6.27	4.45	1.82	0.31	CO960293-2		174	0.25	-0.23	-0.02
Qwab.tamu.1A.514	WAB	MET-ADD	1A	513.664	IWB46448	168.66	513.626	IWA2703	169.65	513.736	4.6	5.27	1.82	3.45	4.68	2	2.68	-0.11	TAM 111		169	0.09	0.09	-0.18
Qwab.tamu.1A.514	WAB	ET14	1A	513.664	IWB46448	168.66	513.626	IWA2703	169.65	513.736	3.2	5.2			8			-0.3	TAM 111		169
Qwab.tamu.3B.691	WAB	BS14	3B	691.33	IWB9039	76.69	683.43	IWB2741	90.68	696.729	3.2	4.9			10.3			-0.4	TAM 111	Y	85
Qwab.tamu.3B.693	WAB	MET-ADD	3B	693.231	IWB9039	76.69	683.43	IWB2741	90.68	696.729	4.6	6.13	5.48	0.65	7.23	5.32	1.91	-0.18	TAM 111	Y	87	0.09	-0.15	0.06
Qwab.tamu.5B.371	WAB	MET-ADD	5B	371.307	IWB8599	42.51	356.597	IWB27185	43.24	378.513	4.6	5.71	4.78	0.93	7.95	5.18	2.76	0.17	CO960293-2		43	-0.09	0.18	-0.09
Qwab.tamu.5B.371	WAB	BS14	5B	371.307	IWB8599	42.51	356.597	IWB27185	43.24	378.513	3.2	4.8			7.5			0.4	CO960293-2		43
Qwab.tamu.5B.522	WAB	ET14	5B	522.07	IWB20925	84.49	520.885	IWB20240	85.48	523.186	3.2	3.3			5			0.2	CO960293-2		85
Qwab.tamu.5B.680	WAB	MET-ADD	5B	679.768	IWB8498	187.75	679.688	IWB56872	189.56	679.804	4.6	5.51	4.81	0.7	6.96	4.92	2.04	0.17	CO960293-2	Y	189	-0.09	0.15	-0.06
Qwab.tamu.5B.680	WAB	BS14	5B	679.768	IWB8498	187.75	679.688	IWB56872	189.56	679.804	3.2	4.4			7.3			0.4	CO960293-2	Y	189
Qwab.tamu.7D.118	WAB	ET14	7D	117.992	IWA6822	102.4	112.79	IWB15511	104.54	119.747	3.2	3.7			5.6			-0.2	TAM 111		104
a MLT, midline left time; MLV, midline left value; MLS, midline left slope; MLW, midline left width; MLI, midline left integral; MPT, midline peak time; MPV, midline peak value; MPW, midline peak width; MPI, midline peak integral; MRT, midline right time; MRV, midline right value; MRS, midline right slope; MRW, midline right width; MRI, midline right integral; MTV, midline trail value; MTS, midli…																												a MLT, midline left time; MLV, midline left value; MLS, midline left slope; MLW, midline left width; MLI, midline left integral; MPT, midline peak time; MPV, midline peak value; MPW, midline peak width; MPI, midline peak integral; MRT, midline right time; MRV, midline right value; MRS, midline right slope; MRW, midline right width; MRI, midline right integral; MTV, midline trail value; MTS, midli…
GCDC, grain Cd concentration; GCOC, grain Co concentration; GLIC, grain Li concentration; GMOC, grain Mo concentration; GRBC, grain Rb concentration; GSRC, grain Sr concentration.																												GCDC, grain Cd concentration; GCOC, grain Co concentration; GLIC, grain Li concentration; GMOC, grain Mo concentration; GRBC, grain Rb concentration; GSRC, grain Sr concentration.
b Environments: HY13, Hays, KS, 2013; BS14, Bushland, TX, 2014; ET14, Etter, TX, 2014 , MET-ADD, multi-envvironment trial QTL analysis for additive effect																												b Environments: HY13, Hays, KS, 2013; BS14, Bushland, TX, 2014; ET14, Etter, TX, 2014 , MET-ADD, multi-envvironment trial QTL analysis for additive effect
c LOD,logarithm of odds; LOD(A), LOD due to additive effects; LOD(AbyE), LOD due to additive-by-environment interction effects																												c LOD,logarithm of odds; LOD(A), LOD due to additive effects; LOD(A*E), LOD due to additive-by-environment interction effects
d PVE, phenotypic variance explained; PVE (A), PVE explained by additive effects; PVP(AbyE), PVE explained by additive-by-environment interaction effects																												d PVE, phenotypic variance explained; PVE (A), PVE explained by additive effects; PVP(A*E), PVE explained by additive-by-environment interaction effects

## Sheet: Table S7
Table S7. Epistasis and epistasis by environment interactional effects of end-use quality traits.
Traita	Chromosome 1	Position 1 (cM)	Position 1 (Mb)	QTL 1 name	Left Marker 1	Left Marker 1 posistion (Mb)	Right Marker 1	Right Marker 1 posistion (Mb)	Chromosome 2	Position2 (cM)	Position2 (Mb)	QTL2 name	Left Marker2	Left Marker 2 posistion (Mb)	Right Marker 2	RightMarker2 posistion (Mb)	LODb	LOD(AA)	LOD(AAbyE)	PVEc	PVE(AA)	PVE(AAbyE)	Add1	Add2	AddbyAdd	A1byE_HY13	A1byE_BS14	A1byE_ET14	A2byE_HY13	A2byE_BS14	A2byE_ET14	AAbyE_HY13	AAbyE_BS14	AAbyE_ET14
MLI	1B	5	23.9219	Qmli.tamu.1B.24	IWB26464	22.7071	IWB8379	168.973	1D	75	65.8488	Qmli.tamu.1D.66	IWB60722	53.8692	IWA7525	66.1993	5.2581	1.7157	3.5424	1.4946	0.476	1.0186	1.3926	0.2657	-3.4554	1.0112	-1.221	0.2098	0.0477	0.544	-0.5916	-6.585	0.8697	5.7153
MLI	2B	15	15.5943	Qmli.tamu.2B.16	IWB54334	11.0838	IWB63279	15.7267	4B	180	572.22	Qmli.tamu.4B.572	IWB26975	570.242	IWB50753	590.442	5.1521	4.9355	0.2166	1.3809	1.3349	0.046	-0.9632	0.8759	-5.8232	3.4459	0.4617	-3.9076	-0.8188	0.7821	0.0367	-0.1081	1.4215	-1.3135
MLI	5B	5	13.4166	Qmli.tamu.5B.13	IWB53000	13.2735	IWB71482	13.4281	5B	125	581.162	Qmli.tamu.5B.581	IWB51364	580.91	IWB179	585.752	5.4841	3.8945	1.5896	1.5032	1.0559	0.4473	1.3968	-0.9622	-5.1762	-2.4085	-0.787	3.1954	1.7289	-2.4759	0.747	-4.3736	0.6226	3.751
MLI	2A	5	9.73222	Qmli.tamu.2A.10	IWB57879	7.68757	IWB100	10.9931	5B	185	678.384	Qmli.tamu.5B.678	IWB26827	678.339	IWB34210	678.664	5.3691	3.4022	1.9669	1.518	0.9826	0.5354	-0.688	-2.7781	-4.938	-0.5051	0.6245	-0.1195	-0.0924	-1.4937	1.5861	-3.4425	-1.6496	5.0921
MLI	1A	190	533.251	Qmli.tamu.1A.533	IWB1972	533.141	IWA4536	533.448	7B	45	43.2627	Qmli.tamu.7B.43	IWB34682	43.1921	IWA6901	43.5454	5.2544	0.4299	4.8245	1.5437	0.114	1.4297	-0.5342	-1.0433	-1.7276	2.5054	-2.7636	0.2581	0.0794	0.9022	-0.9816	-7.3809	-0.1307	7.5115
MLI	5A	110	565.984	Qmli.tamu.5A.566	IWB14134	564.498	IWB38719	577.943	7D	0	5.08867	Qmli.tamu.7D.5	IWB72285	5.08867	IWB34246	5.16714	6.3123	5.9594	0.3529	1.6835	1.6015	0.082	-0.2823	-4.2273	6.3092	1.7775	-0.2166	-1.561	-4.5973	1.7944	2.8028	1.4157	0.4913	-1.907
MLI	3A	295	693.4	Qmli.tamu.3A.693	IWB73266	693.039	IWB29012	710.795	7D	100	109.161	Qmli.tamu.7D.109	IWB41108	54.9986	IWA1323	112.052	7.4465	5.9978	1.4487	1.8988	1.534	0.3647	-0.3528	-0.2051	-6.2108	-1.9697	-0.438	2.4077	-3.2104	-0.2505	3.4609	-3.6813	0.079	3.6022
MLS	2A	215	736.871	Qmls.tamu.2A.737	IWA2938	735.566	IWB12554	746.975	2D	140	397.548	Qmls.tamu.2D.398	IWB29942	390.704	IWB53040	635.595	5.0241	3.3657	1.6584	1.796	1.1672	0.6288	-0.1761	0.057	0.5218	0.1669	-0.2653	0.0984	-0.1217	-0.1255	0.2472	-0.371	0.5275	-0.1565
MLS	1A	190	533.251	Qmls.tamu.1A.533	IWB1972	533.141	IWA4536	533.448	3B	5	14.19	Qmls.tamu.3B.14	IWB56524	13.9666	IWB39254	14.9836	5.0458	1.7235	3.3223	2.0348	0.5912	1.4437	0.0349	0.1915	0.3771	-0.0313	-0.2076	0.2389	-0.3166	0.167	0.1496	-0.3095	0.8253	-0.5158
MLS	2D	80	117.918	Qmls.tamu.2D.118	IWB5428	114.548	IWB28381	238.48	5A	15	29.5965	Qmls.tamu.5A.30	IWB31392	29.5144	IWB31441	29.6819	5.0367	4.4454	0.5913	1.8099	1.5912	0.2187	0.199	-0.125	-0.6091	-0.0294	0.2445	-0.2151	0.2759	-0.621	0.3451	0.0653	-0.3159	0.2506
MLS	2A	35	20.1748	Qmls.tamu.2A.20	IWB57536	10.9933	IWB46206	21.2363	5B	165	643.61	Qmls.tamu.5B.644	IWB70782	639.094	IWB71831	644.889	5.4326	4.0812	1.3514	1.911	1.4278	0.4832	-0.0761	0.1973	0.5785	0.1508	-0.2578	0.107	-0.2672	0.5594	-0.2922	-0.3114	0.4881	-0.1767
MLS	2A	5	9.73222	Qmls.tamu.2A.10	IWB57879	7.68757	IWB100	10.9931	6A	155	608.186	Qmls.tamu.6A.608	IWB14592	608.119	IWA7894	611.489	5.7678	1.6451	4.1226	2.5468	0.6298	1.917	-0.2046	-0.4114	0.3916	0.2042	-0.3476	0.1435	0.1183	-0.1672	0.0489	-0.5925	0.9579	-0.3655
MLS	5B	175	660.595	Qmls.tamu.5B.661	IWB36247	658.74	IWB45677	663.08	6B	110	246.467	Qmls.tamu.6B.246	IWB11133	234.56	IWB59537	250.783	5.4263	2.8671	2.5593	2.1623	1.0835	1.0788	0.2472	-0.008	0.5141	-0.32	0.4261	-0.1061	-0.1416	-0.012	0.1536	-0.4876	0.7068	-0.2192
MLS	3A	360	737.461	Qmls.tamu.3A.737	IWB32648	724.743	IWB19228	737.898	6D	0	1.77335	Qmls.tamu.6D.2	IWB21614	1.77335	IWB1786	2.04825	5.8942	5.4586	0.4357	2.274	2.1516	0.1224	-0.067	-0.041	0.7126	0.0328	-0.1371	0.1043	0.0235	0.2621	-0.2856	-0.2451	0.1496	0.0955
MLS	2B	15	15.5943	Qmls.tamu.2B.16	IWB54334	11.0838	IWB63279	15.7267	6D	145	462.84	Qmls.tamu.6D.463	IWB44754	462.84	IWB6396	462.841	5.1182	3.4166	1.7016	2.1017	1.3088	0.7929	0.0489	0.1118	-0.5522	0.0418	-0.0806	0.0388	0.0617	-0.0085	-0.0533	0.3309	-0.607	0.2761
MLS	5A	175	662.359	Qmls.tamu.5A.662	IWB15035	657.382	IWB58284	663.284	7A	180	670.954	Qmls.tamu.7A.671	IWB45203	670.819	IWB59985	670.96	5.0203	3.1586	1.8618	1.7197	1.1888	0.5309	0.0679	0.2901	0.5265	-0.1195	0.2444	-0.125	-0.0779	0.3292	-0.2513	-0.4898	0.2412	0.2486
MLS	3B	40	29.3268	Qmls.tamu.3B.29	IWB2169	25.2765	IWB59331	31.8137	7B	25	11.7403	Qmls.tamu.7B.12	IWB6455	8.52114	IWB11170	11.9626	5.3021	1.1713	4.1307	2.097	0.3857	1.7113	-0.1378	0.0835	-0.3032	-0.1685	-0.0462	0.2148	-0.0438	0.3113	-0.2675	0.0578	-0.8108	0.753
MLS	7A	30	30.8429	Qmls.tamu.7A.31	IWB48636	30.8117	IWB40429	32.0286	7B	25	11.7403	Qmls.tamu.7B.12	IWB6455	8.52114	IWB11170	11.9626	5.3867	3.2203	2.1664	2.0572	1.2722	0.785	-0.1466	0.1268	0.5542	-0.094	0.1798	-0.0857	-0.0944	0.3064	-0.2119	-0.5556	0.5042	0.0515
MLS	2B	95	172.078	Qmls.tamu.2B.172	IWB34879	167.798	IWB45219	174.93	7B	75	544.139	Qmls.tamu.7B.544	IWB30547	544.139	IWA6401	544.139	5.5347	2.6749	2.8598	2.3286	1.0062	1.3224	0.2729	0.1535	0.4851	-0.0431	-0.04	0.0831	-0.0668	0.1922	-0.1254	-0.4308	0.7839	-0.3531
MLS	3A	65	253.797	Qmls.tamu.3A.254	IWB70483	249.855	IWB34921	515.9	7B	75	544.139	Qmls.tamu.7B.544	IWB30547	544.139	IWA6401	544.139	6.3073	4.2296	2.0777	2.221	1.6127	0.6083	0.0598	0.1681	0.6157	0.1685	0.0108	-0.1794	-0.0692	0.1962	-0.127	-0.5295	0.3294	0.2001
MLS	5A	175	662.359	Qmls.tamu.5A.662	IWB15035	657.382	IWB58284	663.284	7B	185	735.453	Qmls.tamu.7B.735	IWB22873	733.61	IWB34196	739.931	5.2026	2.7128	2.4898	2.004	1.0174	0.9866	0.1233	0.1729	0.4855	-0.1589	0.312	-0.1531	-0.1967	-0.1766	0.3733	-0.5146	0.647	-0.1324
MLT	2A	225	742.969	Qmlt.tamu.2A.743	IWA2938	735.566	IWB12554	746.975	2B	60	52.3776	Qmlt.tamu.2B.52	IWB23172	50.2912	IWB4514	52.9117	6.4185	5.7722	0.6463	1.6561	1.5376	0.1185	-0.0211	-0.029	0.1767	0.0123	0.0037	-0.0159	-0.0133	0.0276	-0.0143	0.031	-0.0694	0.0384
MLT	1D	165	478.858	Qmlt.tamu.1D.479	IWB57122	416.405	IWA1559	484.404	2D	0	27.4946	Qmlt.tamu.2D.27	IWB17603	27.4946	IWB7313	27.6513	5.5172	4.1693	1.3479	2.1618	1.7074	0.4544	-0.0055	-0.0764	-0.183	0.0145	-0.0506	0.0362	-0.0507	-0.0244	0.0752	-0.0931	-0.0352	0.1283
MLT	2A	195	719.081	Qmlt.tamu.2A.719	IWB12522	718.839	IWB973	719.471	3A	200	620.904	Qmlt.tamu.3A.621	IWA1831	593.343	IWB23583	624.832	5.0903	1.7946	3.2958	1.2587	0.4956	0.7631	-0.0542	-0.0651	0.1014	0.0438	-0.0137	-0.0301	-0.0248	-0.0215	0.0463	0.0776	-0.1728	0.0952
MLT	3B	25	21.2845	Qmlt.tamu.3B.21	IWB67002	20.8298	IWB7648	21.3438	5B	5	13.4166	Qmlt.tamu.5B.13	IWB53000	13.2735	IWB71482	13.4281	5.1546	4.2329	0.9217	1.5008	1.2263	0.2745	0.0099	0.0318	0.1559	-0.0134	0.0095	0.0039	-0.0448	-0.0092	0.054	0.0998	-0.0774	-0.0223
MLT	2A	5	9.73222	Qmlt.tamu.2A.10	IWB57879	7.68757	IWB100	10.9931	5B	185	678.384	Qmlt.tamu.5B.678	IWB26827	678.339	IWB34210	678.664	5.3964	3.8012	1.5952	1.5134	1.1199	0.3935	-0.0036	-0.1414	-0.1485	-0.0409	0.0153	0.0256	0.0271	0.0102	-0.0373	-0.0625	-0.0635	0.1261
MLT	1D	170	489.131	Qmlt.tamu.1D.489	IWB6421	488.973	IWB57504	489.536	6A	20	18.4955	Qmlt.tamu.6A.18	IWB29658	15.323	IWB23452	104.359	6.5626	3.5849	2.9777	1.7843	0.9502	0.8341	0.0298	0.0405	0.1367	0.0492	-0.0545	0.0053	0.0421	-0.0024	-0.0396	0.1514	0.0105	-0.1619
MLT	3A	225	686.207	Qmlt.tamu.3A.686	IWB7486	686.128	IWB73266	693.039	6A	85	101.983	Qmlt.tamu.6A.102	IWB29658	15.323	IWB23452	104.359	6.108	5.4649	0.6431	1.6693	1.5153	0.154	-0.0014	0.021	-0.1748	0.0034	-0.0215	0.0181	0.048	-0.018	-0.03	-0.0415	-0.0374	0.0789
MLT	1A	45	41.1236	Qmlt.tamu.1A.41	IWB28624	36.5693	IWB35572	41.9062	6D	15	7.40709	Qmlt.tamu.6D.7	IWB262	7.09848	IWB67933	18.0074	6.5086	5.4196	1.0891	1.8829	1.5345	0.3484	-0.0351	0.0276	0.1754	0.0491	-0.0393	-0.0097	-0.0071	-0.0119	0.019	0.1063	-0.0094	-0.0969
MLT	3D	80	603.202	Qmlt.tamu.3D.603	IWB48314	602.275	IWB49394	604.399	7A	85	67.672	Qmlt.tamu.7A.68	IWB72000	67.6719	IWB21914	67.6721	6.5257	5.7133	0.8125	1.6978	1.5662	0.1316	-0.0584	-0.0116	-0.1764	-0.011	0.0321	-0.0211	0.0505	-0.0529	0.0024	0.0265	0.0479	-0.0744
MLT	7A	85	67.672	Qmlt.tamu.7A.68	IWB72000	67.6719	IWB21914	67.6721	7A	90	68.0858	Qmlt.tamu.7A.68	IWB71928	68.0494	IWB34069	68.0885	5.9793	5.4619	0.5173	1.0895	1.0895	0	0.0372	-0.0528	-0.3725	-0.0178	0.0173	0.0006	0.0704	-0.0738	0.0034	-0.0094	0.0874	-0.078
MLT	4A	20	30.1674	Qmlt.tamu.4A.30	IWB21402	17.2593	IWB4316	40.2838	7A	270	735.968	Qmlt.tamu.7A.736	IWB48220	735.946	IWB63338	736.07	6.4824	5.9098	0.5726	1.8572	1.7014	0.1558	-0.0394	-0.0467	0.1858	-0.005	0.0186	-0.0137	-0.0732	0.0312	0.0419	0.0794	-0.035	-0.0444
MLT	5A	110	565.984	Qmlt.tamu.5A.566	IWB14134	564.498	IWB38719	577.943	7D	0	5.08867	Qmlt.tamu.7D.5	IWB72285	5.08867	IWB34246	5.16714	6.3867	6.1908	0.1959	1.7737	1.7157	0.058	-0.028	-0.131	0.1834	0.0515	-0.0177	-0.0338	-0.0326	0.0553	-0.0227	0.0416	-0.0011	-0.0404
MLV	1B	5	23.9219	Qmlv.tamu.1B.24	IWB26464	22.7071	IWB8379	168.973	1D	0	0.550997	Qmlv.tamu.1D.1	IWB65713	0.550997	IWB74218	0.578135	5.856	5.0789	0.7772	3.4832	2.9123	0.5709	-0.1124	-0.0347	0.9121	0.0217	-0.1293	0.1075	0.3788	-0.5714	0.1926	-0.4116	0.5461	-0.1345
MLV	2B	65	65.4248	Qmlv.tamu.2B.65	IWB56961	65.3755	IWB25663	65.4662	3A	215	658.444	Qmlv.tamu.3A.658	IWA4810	653.513	IWB12852	659.04	6.9588	5.4329	1.5259	3.8808	3.0494	0.8314	-0.0091	-0.3917	0.961	0.2967	-0.7989	0.5022	0.3548	-0.595	0.2402	0.1966	0.4168	-0.6135
MLV	1D	95	190.226	Qmlv.tamu.1D.190	IWB21340	122.549	IWB7344	206.101	3A	355	732.382	Qmlv.tamu.3A.732	IWB32648	724.743	IWB19228	737.898	5.9824	2.6848	3.2976	3.4594	1.3579	2.1014	0.2047	0.0527	-0.626	-0.0628	0.4348	-0.372	-0.0894	-0.0223	0.1116	0.6285	-1.097	0.4685
MLV	2B	125	741.087	Qmlv.tamu.2B.741	IWB27744	741.018	IWB4485	741.445	3D	80	603.202	Qmlv.tamu.3D.603	IWB48314	602.275	IWB49394	604.399	5.6614	4.1968	1.4646	2.982	2.4304	0.5516	0.2892	0.0613	0.8317	0.1789	-0.4643	0.2854	0.0684	-0.3188	0.2503	0.3423	0.206	-0.5484
MLV	3D	70	503.139	Qmlv.tamu.3D.503	IWB26693	27.8831	IWB8928	517.39	4A	170	613.944	Qmlv.tamu.4A.614	IWB61650	607.311	IWB74052	614.411	6.5216	4.4572	2.0645	3.0781	2.3841	0.6939	0.1271	0.1664	0.8245	0.0204	-0.1993	0.1789	-0.0155	-0.0653	0.0808	0.437	0.173	-0.61
MLV	1B	0	2.33263	Qmlv.tamu.1B.2	IWB9291	2.33263	IWB74219	4.34602	5B	125	581.162	Qmlv.tamu.5B.581	IWB51364	580.91	IWB179	585.752	5.0087	2.71	2.2986	2.5193	1.5524	0.967	-0.7403	0.456	0.6779	-0.8551	0.2123	0.6428	0.0971	0.0704	-0.1674	0.3149	0.4352	-0.7502
MLV	3B	105	703.671	Qmlv.tamu.3B.704	IWB2741	696.729	IWB29288	705.004	5D	65	554.353	Qmlv.tamu.5D.554	IWB10788	553.966	IWB45591	554.472	5.0077	2.2812	2.7264	2.6812	1.1716	1.5097	-0.3028	0.3297	-0.5758	0.3698	-0.1114	-0.2584	0.0227	0.1031	-0.1258	0.1613	-0.8794	0.7181
MLV	2B	25	23.4173	Qmlv.tamu.2B.23	IWA3605	21.9517	IWA2407	25.0178	6B	55	32.1572	Qmlv.tamu.6B.32	IWB21500	31.0151	IWB65629	34.3411	5.298	2.8677	2.4302	2.8239	1.4603	1.3636	-0.1359	-0.4241	0.6466	0.2155	-0.1356	-0.08	0.124	-0.3255	0.2015	-0.2073	0.8478	-0.6405
MLV	3B	145	773.621	Qmlv.tamu.3B.774	IWB6197	772.897	IWB12218	819.861	6B	95	127.609	Qmlv.tamu.6B.128	IWB72857	127.608	IWB30069	127.609	6.3589	4.8887	1.4702	3.487	2.6681	0.819	-0.3076	-0.2344	0.8961	0.1836	0.0885	-0.2721	0.0241	-0.4632	0.4391	-0.0815	0.6338	-0.5523
MLV	5A	110	565.984	Qmlv.tamu.5A.566	IWB14134	564.498	IWB38719	577.943	6B	110	246.467	Qmlv.tamu.6B.246	IWB11133	234.56	IWB59537	250.783	5.4954	2.5247	2.9708	3.1625	1.348	1.8145	0.4791	0.0243	0.6339	-0.2751	0.2933	-0.0182	-0.2297	-0.0668	0.2966	-0.2014	0.9841	-0.7827
MLV	2A	35	20.1748	Qmlv.tamu.2A.20	IWB57536	10.9933	IWB46206	21.2363	6B	120	459.794	Qmlv.tamu.6B.460	IWB33714	459.057	IWA451	462.13	5.7954	3.5059	2.2896	3.2583	1.7615	1.4968	-0.2093	0.0299	-0.7348	-0.2004	-0.1378	0.3381	-0.217	-0.0485	0.2655	0.5991	-0.9389	0.3398
MLV	1B	165	675.677	Qmlv.tamu.1B.676	IWB73714	675.56	IWB52979	682.47	7A	145	581.375	Qmlv.tamu.7A.581	IWA476	581.375	IWA477	581.375	5.7263	3.9092	1.8171	3.3298	2.277	1.0528	0.2303	0.0112	-0.8079	-0.1532	0.2564	-0.1032	-0.0096	-0.0995	0.1092	0.042	-0.6922	0.6502
MLV	6B	90	121.724	Qmlv.tamu.6B.122	IWB11233	121.49	IWB59111	122.968	7A	265	731.87	Qmlv.tamu.7A.732	IWB5070	709.409	IWA6735	735.415	5.1171	5.0042	0.113	2.6974	2.648	0.0494	-0.2299	-0.011	0.8825	-0.0407	-0.3434	0.3841	0.2029	-0.1754	-0.0274	0.1354	0.0249	-0.1603
MLV	3A	340	715.271	Qmlv.tamu.3A.715	IWB58806	711.404	IWB10899	717.654	7B	10	3.54322	Qmlv.tamu.7B.4	IWB20228	3.54134	IWB13589	3.70032	5.5593	4.0954	1.4639	2.9099	2.0813	0.8285	0.235	-0.0531	-0.7812	-0.1753	0.1744	0.001	0.3986	-0.429	0.0304	0.2848	-0.7063	0.4215
MLV	5B	0	11.4577	Qmlv.tamu.5B.11	IWB60572	11.4577	IWB61567	12.2627	7B	80	576.334	Qmlv.tamu.7B.576	IWB60564	575.381	IWB59498	583.477	5.4689	3.455	2.0139	3.3131	2.0285	1.2847	-0.3023	0.004	0.7655	-0.2237	0.123	0.1008	-0.0537	0.0787	-0.025	-0.1424	0.8063	-0.6639
MLV	3B	0	13.7652	Qmlv.tamu.3B.14	IWB64711	13.7652	IWB60424	13.8142	7B	105	636.49	Qmlv.tamu.7B.636	IWB35974	634.835	IWB9018	637.618	5.2461	3.5142	1.7319	2.9612	2.0275	0.9337	-0.1704	-0.05	-0.7605	-0.0929	0.0092	0.0837	-0.2819	0.2731	0.0088	-0.0335	-0.6142	0.6477
MLV	2B	15	15.5943	Qmlv.tamu.2B.16	IWB54334	11.0838	IWB63279	15.7267	7B	160	702.472	Qmlv.tamu.7B.702	IWB35583	702.234	IWB48348	702.475	5.5873	3.193	2.3943	2.9125	1.8452	1.0673	-0.1834	-0.0538	0.7259	0.1592	-0.3719	0.2127	0.2909	-0.1419	-0.1491	0.2591	0.5068	-0.7659
MLW	1B	90	592.827	Qmlw.tamu.1B.593	IWA4488	591.114	IWA2064	631.718	1D	40	20.9468	Qmlw.tamu.1D.21	IWB15693	20.045	IWB46853	27.5758	5.6317	5.0273	0.6043	3.2542	2.8737	0.3806	-0.3494	-0.4062	-1.264	0.0624	-0.2018	0.1394	1.1136	-0.799	-0.3146	0.5152	-0.5629	0.0476
MLW	1B	90	592.827	Qmlw.tamu.1B.593	IWA4488	591.114	IWA2064	631.718	2D	80	117.918	Qmlw.tamu.2D.118	IWB5428	114.548	IWB28381	238.48	5.5273	5.0796	0.4478	3.1093	2.866	0.2433	-0.3503	0.2702	-1.2684	0.2054	-0.2622	0.0568	-0.0679	0.4921	-0.4242	-0.3476	-0.1471	0.4946
MLW	2A	240	755.793	Qmlw.tamu.2A.756	IWB11978	755.789	IWB13459	755.795	4A	155	605.525	Qmlw.tamu.4A.606	IWB43375	597.694	IWA1691	605.73	5.1355	4.8796	0.2559	3.0039	2.8743	0.1296	-0.499	-0.293	1.305	-0.253	0.159	0.094	-0.2302	0.0333	0.197	0.1907	0.2127	-0.4034
MLW	5B	170	654.796	Qmlw.tamu.5B.655	IWB162	654.751	IWB25279	656.23	7A	140	539.048	Qmlw.tamu.7A.539	IWB21291	538.799	IWB8440	539.311	5.3103	3.0707	2.2396	3.0438	1.7842	1.2597	0.4618	-0.2001	-1.0086	0.4858	0.2439	-0.7298	-0.2244	-0.2194	0.4438	1.171	-0.3359	-0.8351
MLW	1B	165	675.677	Qmlw.tamu.1B.676	IWB73714	675.56	IWB52979	682.47	7A	160	642.674	Qmlw.tamu.7A.643	IWB10959	617.693	IWB52737	645.092	5.6113	4.9793	0.632	3.2706	2.8815	0.3891	0.4115	0.0097	-1.2749	0.0516	0.2229	-0.2745	0.0624	-0.3444	0.282	0.4519	-0.6304	0.1784
MLW	5A	200	680.474	Qmlw.tamu.5A.680	IWB7014	679.74	IWB23336	680.503	7B	15	5.54883	Qmlw.tamu.7B.6	IWB65277	3.84892	IWA1525	5.92294	6.0024	5.8151	0.1873	3.5755	3.4643	0.1112	0.0489	-0.1727	1.3971	-0.0526	0.2145	-0.1619	0.019	-0.1421	0.1231	-0.3283	0.2802	0.0481
MMST	1A	105	80.9153	Qmmst.tamu.1A.81	IWA5116	74.0298	IWB42357	454.334	2A	235	751.419	Qmmst.tamu.2A.751	IWB34572	750.634	IWB3440	751.663	5.3528	3.0939	2.2589	2.3315	1.4084	0.9231	1.0616	0.0927	1.5083	0.8704	-0.35	-0.5204	0.2294	-1.016	0.7866	1.3845	-1.5931	0.2085
MMST	1D	90	79.528	Qmmst.tamu.1D.80	IWB9742	75.8584	IWB65387	80.4454	2B	55	41.6349	Qmmst.tamu.2B.42	IWB70935	41.2	IWA1929	41.9611	6.4819	5.3959	1.0861	3.124	2.5259	0.5981	-0.4581	0.7255	-2.0319	0.3418	0.9952	-1.3371	-0.3462	-0.0422	0.3883	-1.3341	0.2982	1.0358
MMST	1B	165	675.677	Qmmst.tamu.1B.676	IWB73714	675.56	IWB52979	682.47	3A	65	253.797	Qmmst.tamu.3A.254	IWB70483	249.855	IWB34921	515.9	5.6226	2.3986	3.224	2.7131	1.1205	1.5927	0.7103	-0.6368	-1.3236	-0.0203	0.5307	-0.5104	-0.3675	0.4875	-0.12	-2.258	1.4248	0.8333
MMST	1D	30	12.0906	Qmmst.tamu.1D.12	IWB42815	10.8457	IWB21001	12.5349	4A	155	605.525	Qmmst.tamu.4A.606	IWB43375	597.694	IWA1691	605.73	5.6193	3.8353	1.7839	2.599	1.7575	0.8415	-0.4935	-0.1048	1.6756	-0.6585	0.5348	0.1237	-0.3422	0.4372	-0.095	1.588	-1.1492	-0.4387
MMST	2B	100	426.254	Qmmst.tamu.2B.426	IWB73766	407.235	IWB57846	438.933	5A	110	565.984	Qmmst.tamu.5A.566	IWB14134	564.498	IWB38719	577.943	5.4857	2.3102	3.1755	2.5198	1.0553	1.4644	-0.5212	1.1555	-1.2913	-0.3692	0.3499	0.0193	0.4488	-0.8126	0.3638	-2.0166	1.6648	0.3518
MMST	4D	10	455.436	Qmmst.tamu.4D.455	IWB7083	455.344	IWA286	455.489	5A	120	576.093	Qmmst.tamu.5A.576	IWB14134	564.498	IWB38719	577.943	6.0203	3.728	2.2922	2.7235	1.6892	1.0342	-0.0686	0.1693	1.6449	-0.8202	-0.4364	1.2566	0.4822	0.2059	-0.6881	1.6654	-1.4203	-0.2451
MMST	5A	220	704.751	Qmmst.tamu.5A.705	IWB10235	702.461	IWB32457	706.24	6A	150	607.383	Qmmst.tamu.6A.607	IWB74002	606.99	IWA2579	608.073	5.1584	3.7705	1.3879	1.9389	1.5185	0.4204	-0.0989	-0.1921	1.5823	0.7089	0.0855	-0.7944	-0.0868	-0.008	0.0949	0.6719	-1.1604	0.4885
MMST	4D	5	424.97	Qmmst.tamu.4D.425	IWB55383	409.642	IWA3815	455.251	6B	90	121.724	Qmmst.tamu.6B.122	IWB11233	121.49	IWB59111	122.968	8.4203	6.7269	1.6934	3.88	3.0981	0.782	-0.742	0.0767	-2.2612	-1.13	0.0842	1.0459	-0.2378	0.2365	0.0013	-1.5734	1.1061	0.4673
MMST	5A	165	655.309	Qmmst.tamu.5A.655	IWB64718	654.098	IWB59439	657.381	6B	195	710.47	Qmmst.tamu.6B.710	IWB72471	709.533	IWA3880	711.757	5.0264	3.4127	1.6136	2.271	1.5523	0.7186	-0.3741	-0.2583	1.5812	1.0595	-0.2016	-0.8579	-0.4173	0.0341	0.3832	1.4571	-1.0913	-0.3658
MMST	3D	75	566.122	Qmmst.tamu.3D.566	IWB8928	517.39	IWA1311	600.155	7A	75	57.943	Qmmst.tamu.7A.58	IWB8825	52.4144	IWB8374	64.8411	5.506	4.3538	1.1522	2.1982	1.7997	0.3986	0.9168	0.0875	1.6999	-0.7559	-0.097	0.8529	-0.2155	-0.5267	0.7422	0.7433	-1.0469	0.3036
MMST	3B	45	35.3748	Qmmst.tamu.3B.35	IWB6207	32.2862	IWB29353	37.2515	7A	100	79.5854	Qmmst.tamu.7A.80	IWB7554	79.5428	IWB8476	79.6523	5.6445	3.9198	1.7247	2.6344	1.8437	0.7907	-0.5335	-0.4487	1.7105	0.3904	-0.7201	0.3297	-1.1287	0.3785	0.7502	1.5325	-1.2138	-0.3187
MMST	5B	150	618.97	Qmmst.tamu.5B.619	IWA8250	618.124	IWA3500	620.018	7D	55	49.5467	Qmmst.tamu.7D.50	IWB10326	13.0455	IWA5584	50.7276	5.2435	3.9968	1.2467	2.2936	1.7249	0.5687	0.9839	-0.868	-1.6725	1.4566	-0.6943	-0.7622	0.4285	-0.6865	0.258	-1.2811	0.9513	0.3298
MPI	1B	120	643.669	Qmpi.tamu.1B.644	IWB51317	641.199	IWB6778	673.743	1D	35	18.0941	Qmpi.tamu.1D.18	IWB24130	18.075	IWB56136	18.1632	5.1671	2.3434	2.8237	1.4154	0.6145	0.801	-0.0764	2.0936	-3.9474	-0.2974	1.403	-1.1056	1.9796	-2.6073	0.6277	-5.9352	0.9906	4.9445
MPI	3B	50	46.4844	Qmpi.tamu.3B.46	IWB32390	45.2821	IWB37006	48.8889	4B	135	405.59	Qmpi.tamu.4B.406	IWB26862	286.125	IWB61082	406.331	5.4777	5.1324	0.3452	1.6652	1.5527	0.1125	1.4507	-0.3861	6.3971	0.2161	0.9899	-1.206	-1.6658	1.9431	-0.2773	2.2085	-1.9669	-0.2416
MPI	3B	135	764.867	Qmpi.tamu.3B.765	IWB28603	761.879	IWA1094	766.642	4D	0	89.541	Qmpi.tamu.4D.90	IWB34360	89.541	IWB30317	108.903	6.1481	4.6414	1.5067	1.6943	1.3071	0.3872	-2.5296	1.8774	-5.777	-1.3797	2.7011	-1.3214	0.5805	0.3263	-0.9067	-4.1912	3.4858	0.7054
MPI	2A	155	195.381	Qmpi.tamu.2A.195	IWB14315	153.035	IWA3842	195.82	5A	170	659.393	Qmpi.tamu.5A.659	IWB15035	657.382	IWB58284	663.284	5.3717	3.0437	2.328	1.5658	0.8534	0.7124	-0.6955	-1.2689	-4.6614	-2.1543	1.7631	0.3913	1.6309	-0.2348	-1.3962	-5.8867	1.962	3.9247
MPI	1A	190	533.251	Qmpi.tamu.1A.533	IWB1972	533.141	IWA4536	533.448	7B	45	43.2627	Qmpi.tamu.7B.43	IWB34682	43.1921	IWA6901	43.5454	5.0557	0.3574	4.6982	1.7218	0.1015	1.6204	-1.6968	-1.6812	-1.6581	0.4492	-1.8017	1.3525	-0.7995	1.2813	-0.4818	-8.7493	1.798	6.9513
MPI	3B	0	13.7652	Qmpi.tamu.3B.14	IWB64711	13.7652	IWB60424	13.8142	7B	100	620.693	Qmpi.tamu.7B.621	IWB35405	589.711	IWB25170	622.685	5.8855	4.1436	1.7419	1.792	1.2173	0.5747	-1.0792	-1.7107	-5.5687	1.0645	-0.5966	-0.4679	-0.7371	1.9076	-1.1706	-5.3331	1.8514	3.4817
MPI	7A	25	26.8717	Qmpi.tamu.7A.27	IWB49797	25.923	IWB35150	27.2883	7B	175	719.216	Qmpi.tamu.7B.719	IWB53759	719.083	IWB7576	720.065	5.2136	1.8622	3.3514	1.7085	0.5479	1.1606	1.4513	-2.2418	-3.804	-2.6931	1.4269	1.2662	-1.715	2.2576	-0.5425	-7.4812	2.3264	5.1548
MPI	5A	110	565.984	Qmpi.tamu.5A.566	IWB14134	564.498	IWB38719	577.943	7D	0	5.08867	Qmpi.tamu.7D.5	IWB72285	5.08867	IWB34246	5.16714	6.0605	5.6506	0.4099	1.6612	1.5777	0.0835	0.4118	-3.7836	6.3154	2.7269	-0.8935	-1.8334	-3.5549	0.9669	2.588	0.7387	1.2541	-1.9928
MPI	3A	295	693.4	Qmpi.tamu.3A.693	IWB73266	693.039	IWB29012	710.795	7D	100	109.161	Qmpi.tamu.7D.109	IWB41108	54.9986	IWA1323	112.052	6.7213	5.3517	1.3696	1.8455	1.4658	0.3797	0.4295	-0.2102	-6.1282	-0.7293	-1.039	1.7683	-3.2698	-0.0719	3.3416	-4.0539	0.6154	3.4385
MPT	1D	165	478.858	Qmpt.tamu.1D.479	IWB57122	416.405	IWA1559	484.404	2D	0	27.4946	Qmpt.tamu.2D.27	IWB17603	27.4946	IWB7313	27.6513	5.2849	4.7315	0.5534	1.9092	1.7149	0.1942	-0.0227	-0.0508	-0.1917	0.0299	-0.0096	-0.0203	-0.0759	-0.0206	0.0965	-0.0815	0.002	0.0796
MPT	2D	140	397.548	Qmpt.tamu.2D.398	IWB29942	390.704	IWB53040	635.595	2D	175	634.714	Qmpt.tamu.2D.635	IWB29942	390.704	IWB53040	635.595	5.387	4.808	0.579	1.3265	1.1789	0.1477	-0.0119	0.0524	-0.1651	0.0327	-0.0426	0.0099	0.0393	0.0168	-0.056	-0.0671	-0.008	0.0751
MPT	3A	225	686.207	Qmpt.tamu.3A.686	IWB7486	686.128	IWB73266	693.039	5A	190	672.318	Qmpt.tamu.5A.672	IWB11590	667.103	IWA1670	673.708	5.6958	4.6235	1.0723	1.3661	1.161	0.2052	-0.0494	0.0243	-0.159	0.0213	-0.0323	0.011	0.0434	0.0101	-0.0535	0.0189	-0.0899	0.071
MPT	1D	170	489.131	Qmpt.tamu.1D.489	IWB6421	488.973	IWB57504	489.536	6A	20	18.4955	Qmpt.tamu.6A.18	IWB29658	15.323	IWB23452	104.359	6.0336	2.7618	3.2718	1.4521	0.6352	0.8169	0.0143	0.0291	0.1171	0.0647	-0.007	-0.0577	0.0522	-0.0395	-0.0127	0.1696	-0.0156	-0.154
MPT	3A	225	686.207	Qmpt.tamu.3A.686	IWB7486	686.128	IWB73266	693.039	6A	85	101.983	Qmpt.tamu.6A.102	IWB29658	15.323	IWB23452	104.359	5.1401	4.3181	0.822	1.2201	1.0346	0.1855	-0.0245	0.0033	-0.1512	0.026	-0.0258	-0.0002	0.0648	0.0007	-0.0654	-0.0621	-0.0266	0.0886
MPT	6A	20	18.4955	Qmpt.tamu.6A.18	IWB29658	15.323	IWB23452	104.359	6B	105	158.815	Qmpt.tamu.6B.159	IWB72770	157.475	IWB10191	158.856	6.2117	5.0934	1.1184	1.4359	1.2264	0.2095	-0.001	-0.0875	-0.1653	0.0421	-0.022	-0.0201	-0.0434	0.0332	0.0101	-0.0529	0.0979	-0.045
MPT	1A	45	41.1236	Qmpt.tamu.1A.41	IWB28624	36.5693	IWB35572	41.9062	6D	15	7.40709	Qmpt.tamu.6D.7	IWB262	7.09848	IWB67933	18.0074	7.3261	6.0303	1.2958	1.835	1.4944	0.3406	-0.0215	0.0226	0.1812	0.0362	-0.0564	0.0202	-0.0024	-0.0332	0.0355	0.1	0.0132	-0.1132
MPT	4B	135	405.59	Qmpt.tamu.4B.406	IWB26862	286.125	IWB61082	406.331	6D	100	424.91	Qmpt.tamu.6D.425	IWB6782	422.204	IWB44754	462.84	5.0187	4.2039	0.8148	1.1673	1.0121	0.1552	0.0136	0.0107	-0.1481	-0.0433	0.0384	0.0049	-0.0204	0.0555	-0.0352	-0.0436	0.0812	-0.0377
MPT	3D	80	603.202	Qmpt.tamu.3D.603	IWB48314	602.275	IWB49394	604.399	7A	85	67.672	Qmpt.tamu.7A.68	IWB72000	67.6719	IWB21914	67.6721	5.5782	5.2256	0.3527	1.3147	1.2714	0.0433	-0.0421	-0.0048	-0.1666	-0.0259	-0.0076	0.0335	0.0435	-0.0289	-0.0146	0.0189	0.0276	-0.0464
MPT	4A	20	30.1674	Qmpt.tamu.4A.30	IWB21402	17.2593	IWB4316	40.2838	7A	270	735.968	Qmpt.tamu.7A.736	IWB48220	735.946	IWB63338	736.07	5.886	4.7985	1.0875	1.4386	1.1871	0.2516	-0.0374	-0.0532	0.1627	-0.01	0.0216	-0.0116	-0.0661	0.0659	0.0002	0.0988	-0.0153	-0.0835
MPT	1B	170	679.86	Qmpt.tamu.1B.680	IWB73714	675.56	IWB52979	682.47	7B	20	9.03058	Qmpt.tamu.7B.9	IWB6455	8.52114	IWB11170	11.9626	5.3811	4.9874	0.3937	1.2662	1.2082	0.058	-0.0694	0.0251	0.1622	-0.0147	-0.0545	0.0692	-0.0422	0.0015	0.0407	0.0104	-0.0508	0.0404
MPT	5A	110	565.984	Qmpt.tamu.5A.566	IWB14134	564.498	IWB38719	577.943	7D	0	5.08867	Qmpt.tamu.7D.5	IWB72285	5.08867	IWB34246	5.16714	6.3798	5.7889	0.5909	1.5642	1.4328	0.1314	-0.0011	-0.087	0.1752	0.0251	0.0077	-0.0328	-0.0764	0.0296	0.0468	0.0489	0.0245	-0.0734
MPV	2B	65	65.4248	Qmpv.tamu.2B.65	IWB56961	65.3755	IWB25663	65.4662	3A	215	658.444	Qmpv.tamu.3A.658	IWA4810	653.513	IWB12852	659.04	6.4632	3.4331	3.0301	2.7161	1.5869	1.1292	0.2017	-0.3403	0.7405	0.1959	-0.3814	0.1855	0.3793	-0.4918	0.1125	0.4513	0.3846	-0.8359
MPV	3D	75	566.122	Qmpv.tamu.3D.566	IWB8928	517.39	IWA1311	600.155	4A	170	613.944	Qmpv.tamu.4A.614	IWB61650	607.311	IWB74052	614.411	6.8148	4.8696	1.9452	2.9326	2.2859	0.6467	0.1096	-0.0026	0.8484	-0.2433	0.0114	0.2319	0.1752	-0.5567	0.3814	0.4722	0.1391	-0.6112
MPV	1D	35	18.0941	Qmpv.tamu.1D.18	IWB24130	18.075	IWB56136	18.1632	4D	0	89.541	Qmpv.tamu.4D.90	IWB34360	89.541	IWB30317	108.903	5.5454	3.3723	2.1731	2.6471	1.6697	0.9774	-0.1826	0.0711	0.7289	0.0958	-0.4864	0.3905	0.0351	-0.0558	0.0206	0.0486	0.6577	-0.7062
MPV	2B	20	18.2686	Qmpv.tamu.2B.18	IWB23765	16.8573	IWB4596	18.387	5A	195	677.638	Qmpv.tamu.5A.678	IWB11221	677.632	IWB14661	677.845	5.9955	2.7071	3.2885	3.3375	1.3249	2.0126	-0.1157	-0.1078	0.6449	0.0191	-0.108	0.089	-0.3411	0.1638	0.1773	-0.6775	1.1168	-0.4393
MPV	3B	125	758.227	Qmpv.tamu.3B.758	IWB23678	756.824	IWB12091	759.169	5D	45	541.667	Qmpv.tamu.5D.542	IWB63278	440.903	IWA6994	543.692	5.011	2.3217	2.6894	2.0245	1.0853	0.9392	-0.1578	0.0532	-0.5895	0.1301	-0.0085	-0.1216	0.286	-0.1068	-0.1792	-0.3463	-0.4324	0.7787
MPV	6B	40	22.3461	Qmpv.tamu.6B.22	IWA5942	22.1042	IWB67585	30.3243	6D	150	464.62	Qmpv.tamu.6D.465	IWB49496	464.177	IWA1741	464.72	5.7051	1.8246	3.8805	3.1044	0.8455	2.259	0.0192	-0.2906	-0.5164	-0.1018	0.3173	-0.2155	0.3412	-0.3914	0.0502	0.6456	-1.1956	0.5499
MPV	3B	130	763.095	Qmpv.tamu.3B.763	IWB28603	761.879	IWA1094	766.642	7A	30	30.8429	Qmpv.tamu.7A.31	IWB48636	30.8117	IWB40429	32.0286	6.2592	3.775	2.4842	2.5055	1.634	0.8715	-0.1564	-0.3123	0.7236	0.0892	0.073	-0.1621	-0.0739	0.1903	-0.1163	0.2181	0.511	-0.7291
MPV	5A	15	29.5965	Qmpv.tamu.5A.30	IWB31392	29.5144	IWB31441	29.6819	7A	75	57.943	Qmpv.tamu.7A.58	IWB8825	52.4144	IWB8374	64.8411	5.6973	3.1384	2.559	2.3532	1.397	0.9562	-0.2546	-0.2409	0.6581	-0.0326	-0.0607	0.0933	0.1584	-0.3844	0.2259	0.1254	0.6002	-0.7256
MPV	3A	195	583.337	Qmpv.tamu.3A.583	IWA8063	574.344	IWA1831	593.343	7A	125	266.643	Qmpv.tamu.7A.267	IWA7002	266.643	IWB28094	266.646	5.4238	2.3015	3.1223	2.2564	1.1204	1.136	0.1834	0.0083	-0.594	0.5327	-0.3136	-0.2191	-0.053	-0.0703	0.1232	-0.7962	0.1469	0.6494
MPV	6B	40	22.3461	Qmpv.tamu.6B.22	IWA5942	22.1042	IWB67585	30.3243	7A	130	285.584	Qmpv.tamu.7A.286	IWB64116	285.171	IWB24311	285.607	5.0834	1.7705	3.3129	2.1651	0.8529	1.3121	0.0792	0.101	-0.5207	-0.0846	0.4061	-0.3214	-0.0071	-0.123	0.1301	-0.2384	-0.6445	0.8829
MPV	5B	0	11.4577	Qmpv.tamu.5B.11	IWB60572	11.4577	IWB61567	12.2627	7B	80	576.334	Qmpv.tamu.7B.576	IWB60564	575.381	IWB59498	583.477	5.5197	2.6057	2.9141	2.7601	1.2839	1.4762	-0.2219	0.1107	0.6395	-0.2607	0.5383	-0.2776	-0.1693	0.1406	0.0287	-0.189	0.9167	-0.7277
MPV	1A	40	32.711	Qmpv.tamu.1A.33	IWB6131	31.7815	IWB45602	32.8935	7B	85	591.111	Qmpv.tamu.7B.591	IWB35405	589.711	IWB25170	622.685	5.7783	0.6146	5.1637	2.4046	0.2967	2.1079	0.0355	0.2193	-0.3056	0.4914	-0.1198	-0.3716	-0.2304	0.243	-0.0126	-0.1496	-0.9309	1.0805
MPW	1B	90	592.827	Qmpw.tamu.1B.593	IWA4488	591.114	IWA2064	631.718	2D	80	117.918	Qmpw.tamu.2D.118	IWB5428	114.548	IWB28381	238.48	5.3586	3.7985	1.5602	2.5587	1.9405	0.6182	-0.2646	0.3567	-0.7137	-0.1044	0.1524	-0.048	-0.5064	0.4373	0.0691	-0.4344	-0.1204	0.5548
MPW	2A	220	739.92	Qmpw.tamu.2A.740	IWA2938	735.566	IWB12554	746.975	4A	160	607.542	Qmpw.tamu.4A.608	IWB61650	607.311	IWB74052	614.411	5.5905	2.1083	3.4822	2.6003	0.9369	1.6634	-0.0713	-0.1905	0.5024	-0.0301	-0.1906	0.2208	0.1797	-0.3395	0.1598	-0.3959	0.945	-0.5491
MPW	3B	215	819.69	Qmpw.tamu.3B.820	IWB6197	772.897	IWB12218	819.861	4D	25	484.069	Qmpw.tamu.4D.484	IWB1427	482.706	IWB28897	484.742	6.1368	3.1904	2.9465	3.0757	1.6337	1.442	-0.5555	-0.0949	0.6688	-0.1968	0.1747	0.0221	0.2447	-0.2554	0.0107	0.107	0.705	-0.812
MPW	2A	235	751.419	Qmpw.tamu.2A.751	IWB34572	750.634	IWB3440	751.663	5A	90	548.854	Qmpw.tamu.5A.549	IWB7726	548.626	IWB20138	549.356	5.2826	3.2028	2.0798	2.8558	1.7668	1.0889	-0.2287	0.2233	-0.6933	-0.2024	-0.0934	0.2958	0.0902	-0.0308	-0.0594	-0.0447	-0.6416	0.6863
MPW	5B	175	660.595	Qmpw.tamu.5B.661	IWB36247	658.74	IWB45677	663.08	5B	195	684.693	Qmpw.tamu.5B.685	IWB41664	684.616	IWB26951	684.746	5.7603	3.0302	2.7301	2.9268	1.7233	1.2035	0.005	0.0949	-0.7753	0.2681	-0.0759	-0.1922	-0.2442	0.4311	-0.1869	-0.565	-0.3777	0.9427
MPW	2B	65	65.4248	Qmpw.tamu.2B.65	IWB56961	65.3755	IWB25663	65.4662	6A	20	18.4955	Qmpw.tamu.6A.18	IWB29658	15.323	IWB23452	104.359	5.3152	3.5329	1.7823	2.6474	1.7912	0.8562	0.1422	0.1677	-0.6934	0.1314	-0.7456	0.6142	-0.0332	0.2205	-0.1873	0.0313	-0.6094	0.5781
MPW	5B	225	708.236	Qmpw.tamu.5B.708	IWB59208	707.7	IWB28598	711.583	6B	75	50.3684	Qmpw.tamu.6B.50	IWA8228	48.6946	IWB47322	50.9887	5.4345	1.8337	3.6008	3.0142	0.9793	2.0349	-0.0643	0.0875	-0.509	-0.2455	-0.1145	0.36	-0.0505	-0.0161	0.0666	0.4226	-1.0322	0.6096
MPW	3B	30	23.0153	Qmpw.tamu.3B.23	IWB63728	21.4031	IWB41105	23.5994	6B	125	545.123	Qmpw.tamu.6B.545	IWB69230	542.225	IWB24239	546.657	5.1857	3.5002	1.6855	2.6001	1.8491	0.751	-0.172	0.1988	-0.7167	-0.0297	-0.0483	0.078	0.0106	-0.2854	0.2748	-0.5705	0.0264	0.5441
MPW	5B	0	11.4577	Qmpw.tamu.5B.11	IWB60572	11.4577	IWB61567	12.2627	7A	125	266.643	Qmpw.tamu.7A.267	IWA7002	266.643	IWB28094	266.646	5.3336	4.6671	0.6666	3.0756	2.6523	0.4233	-0.0714	-0.4569	-0.8462	-0.1384	0.2023	-0.0639	-0.1899	-0.0677	0.2576	0.211	-0.4744	0.2635
MPW	5B	220	704.752	Qmpw.tamu.5B.705	IWB65485	703.501	IWB53784	704.822	7B	75	544.139	Qmpw.tamu.7B.544	IWB30547	544.139	IWA6401	544.139	5.2857	1.8779	3.4078	3.0461	1.0037	2.0424	-0.1481	-0.2421	0.5292	-0.2068	-0.1851	0.3918	-0.1759	-0.1334	0.3093	-0.5267	1.0643	-0.5376
MPW	5B	155	623.634	Qmpw.tamu.5B.624	IWB29993	623.221	IWB46219	624.695	7D	55	49.5467	Qmpw.tamu.7D.50	IWB10326	13.0455	IWA5584	50.7276	5.0084	2.9116	2.0969	2.7917	1.5082	1.2835	0.0222	-0.3769	-0.6362	-0.291	0.3891	-0.0981	-0.5836	0.0025	0.5811	0.4858	-0.8233	0.3375
MPW	6D	45	17.8098	Qmpw.tamu.6D.18	IWB262	7.09848	IWB67933	18.0074	7D	100	109.161	Qmpw.tamu.7D.109	IWB41108	54.9986	IWA1323	112.052	5.7804	3.5392	2.2412	2.9847	1.8043	1.1804	0.1857	-0.3552	0.6881	-0.0043	0.099	-0.0947	0.1258	-0.243	0.1172	-0.2394	0.7716	-0.5322
MRI	2B	25	23.4173	Qmri.tamu.2B.23	IWA3605	21.9517	IWA2407	25.0178	2B	100	426.254	Qmri.tamu.2B.426	IWB73766	407.235	IWB57846	438.933	5.6641	4.3645	1.2996	1.9405	1.4519	0.4886	1.0329	-0.5485	6.0677	1.8712	-0.278	-1.5931	-2.2203	3.3002	-1.08	-4.7359	3.7764	0.9595
MRI	2B	120	695.136	Qmri.tamu.2B.695	IWB66366	694.057	IWB40157	695.373	2D	175	634.714	Qmri.tamu.2D.635	IWB29942	390.704	IWB53040	635.595	5.9243	4.3464	1.5779	2.0586	1.5623	0.4962	-1.2807	-0.3671	6.2977	-3.0822	3.548	-0.4658	1.7979	-1.2159	-0.5821	1.6601	3.2105	-4.8706
MRI	1A	20	10.9062	Qmri.tamu.1A.11	IWB29601	10.1277	IWB12589	11.9506	4A	160	607.542	Qmri.tamu.4A.608	IWB61650	607.311	IWB74052	614.411	5.6971	3.871	1.8262	2.0928	1.3688	0.724	-6.7239	0.3924	-5.9966	2.8978	-6.7782	3.8804	-1.9347	4.5661	-2.6313	6.0938	-5.0309	-1.0629
MRI	5A	125	588.377	Qmri.tamu.5A.588	IWB9678	585.08	IWB46787	590.849	5D	65	554.353	Qmri.tamu.5D.554	IWB10788	553.966	IWB45591	554.472	5.9053	3.5602	2.3451	2.201	1.2235	0.9775	1.2276	-0.3219	-5.5618	3.8641	-0.184	-3.6801	0.2044	0.3268	-0.5312	4.0369	-6.9892	2.9523
MRI	5A	115	571.038	Qmri.tamu.5A.571	IWB14134	564.498	IWB38719	577.943	6B	110	246.467	Qmri.tamu.6B.246	IWB11133	234.56	IWB59537	250.783	5.0121	1.3297	3.6824	1.4234	0.3945	1.0289	1.6351	0.2939	3.2295	2.6711	1.257	-3.9281	-1.6966	0.1068	1.5898	1.6937	5.362	-7.0557
MRI	5A	165	655.309	Qmri.tamu.5A.655	IWB64718	654.098	IWB59439	657.381	7A	150	621.083	Qmri.tamu.7A.621	IWB10959	617.693	IWB52737	645.092	5.0627	4.2599	0.8029	1.8318	1.4984	0.3335	-1.0847	0.0422	-6.1785	2.6829	-1.8569	-0.826	1.2673	-2.3019	1.0345	2.5919	-4.0846	1.4927
MRI	2B	170	778.064	Qmri.tamu.2B.778	IWB24454	777.144	IWB27094	778.848	7B	105	636.49	Qmri.tamu.7B.636	IWB35974	634.835	IWB9018	637.618	5.8156	3.6906	2.125	2.0469	1.216	0.8309	1.1978	-1.1419	-5.5962	-1.044	5.5983	-4.5543	-0.4079	-0.1704	0.5783	3.9033	-6.5162	2.6128
MRS	1B	5	23.9219	Qmrs.tamu.1B.24	IWB26464	22.7071	IWB8379	168.973	1D	70	62.3439	Qmrs.tamu.1D.62	IWB60722	53.8692	IWA7525	66.1993	5.2235	2.7873	2.4362	1.7413	0.9396	0.8017	0.0532	0.1827	-0.1389	0.0805	-0.0567	-0.0239	-0.0072	-0.1042	0.1113	-0.0775	0.181	-0.1035
MRS	1A	25	13.9937	Qmrs.tamu.1A.14	IWB63611	13.7683	IWB73615	14.0561	2A	255	770.263	Qmrs.tamu.2A.770	IWB11240	767.792	IWB5416	770.358	5.1152	0.4073	4.7079	1.8629	0.1751	1.6878	-0.0851	0.0184	-0.0611	0.0091	0.0828	-0.0919	0.0061	0.1188	-0.1249	0.1887	-0.2508	0.0621
MRS	1D	35	18.0941	Qmrs.tamu.1D.18	IWB24130	18.075	IWB56136	18.1632	2D	175	634.714	Qmrs.tamu.2D.635	IWB29942	390.704	IWB53040	635.595	6.3118	4.1421	2.1697	2.5631	1.7388	0.8242	0.0294	-0.0355	-0.1921	-0.0153	-0.0198	0.0351	-0.0137	0.0992	-0.0854	0.1606	0.0059	-0.1666
MRS	1A	225	586.326	Qmrs.tamu.1A.586	IWB8702	584.479	IWB7128	586.952	5B	125	581.162	Qmrs.tamu.5B.581	IWB51364	580.91	IWB179	585.752	5.5746	4.2077	1.3668	2.292	1.7542	0.5378	-0.0367	-0.0269	0.1902	0.0161	0.0614	-0.0775	-0.0249	-0.0019	0.0268	-0.1191	-0.019	0.1381
MRS	3B	120	746.866	Qmrs.tamu.3B.747	IWB34253	744.214	IWB74787	750.138	6A	170	617.005	Qmrs.tamu.6A.617	IWB29615	616.924	IWB12441	617.049	5.5778	3.7286	1.8492	2.0255	1.4617	0.5639	0.0917	0.0601	-0.174	0.0008	-0.0107	0.0099	-0.0223	-0.0235	0.0458	0.1527	-0.0901	-0.0626
MRS	5B	60	464.971	Qmrs.tamu.5B.465	IWB17929	464.889	IWB56833	465.995	6B	60	35.8897	Qmrs.tamu.6B.36	IWB7468	35.6333	IWA1850	36.2101	5.9344	4.2719	1.6624	2.6036	1.8235	0.7802	-0.0412	-0.0415	0.1941	-0.0179	0.0848	-0.0669	-0.0269	0.0678	-0.0409	-0.0977	-0.0814	0.1791
MRS	4D	0	89.541	Qmrs.tamu.4D.90	IWB34360	89.541	IWB30317	108.903	6B	95	127.609	Qmrs.tamu.6B.128	IWB72857	127.608	IWB30069	127.609	7.7995	5.4787	2.3208	3.0458	2.3222	0.7236	0.1184	0.0015	0.2235	-0.0735	0.1345	-0.0609	-0.0277	0.0313	-0.0036	-0.161	0.146	0.015
MRS	1B	175	685.135	Qmrs.tamu.1B.685	IWB5319	682.486	IWB31066	685.741	7A	135	486.305	Qmrs.tamu.7A.486	IWB16697	486.158	IWA759	487.249	5.2645	0.1216	5.1429	2.0208	0.052	1.9689	-0.0914	-0.0206	0.033	0.0747	-0.0006	-0.0741	-0.0245	0.1257	-0.1012	-0.1674	0.2834	-0.116
MRS	3A	0	1.6228	Qmrs.tamu.3A.2	IWB26921	1.6228	IWB17619	6.89878	7A	180	670.954	Qmrs.tamu.7A.671	IWB45203	670.819	IWB59985	670.96	5.7266	3.6909	2.0357	2.3456	1.5811	0.7645	-0.0116	-0.1021	0.1803	-0.0667	0.0972	-0.0306	0.0407	-0.0611	0.0205	-0.1609	0.0141	0.1468
MRS	6D	155	468.856	Qmrs.tamu.6D.469	IWB7256	467.188	IWB25019	470.977	7B	190	749.422	Qmrs.tamu.7B.749	IWB64853	749.422	IWB22589	749.422	5.5004	4.963	0.5374	2.1992	2.0816	0.1176	0.0115	-0.0277	-0.207	0.004	0.1115	-0.1155	-0.0071	0.1095	-0.1024	0.0761	-0.0725	-0.0037
MRT	2B	120	695.136	Qmrt.tamu.2B.695	IWB66366	694.057	IWB40157	695.373	2D	175	634.714	Qmrt.tamu.2D.635	IWB29942	390.704	IWB53040	635.595	8.1807	7.6753	0.5053	2.8193	2.6631	0.1562	-0.0508	0.0134	0.2029	-0.0021	0.0353	-0.0333	0.0624	-0.0309	-0.0315	0.0429	0.026	-0.0689
MRT	3B	130	763.095	Qmrt.tamu.3B.763	IWB28603	761.879	IWA1094	766.642	4B	190	615.359	Qmrt.tamu.4B.615	IWB58865	613.154	IWB62918	616.999	5.4754	4.133	1.3423	1.8168	1.3827	0.4341	-0.0416	-0.0029	0.1473	-0.0305	0.0478	-0.0173	-0.0107	0.0014	0.0093	0.0018	0.1001	-0.102
MRT	4B	190	615.359	Qmrt.tamu.4B.615	IWB58865	613.154	IWB62918	616.999	5B	5	13.4166	Qmrt.tamu.5B.13	IWB53000	13.2735	IWB71482	13.4281	5.367	3.2653	2.1017	1.9183	1.1582	0.7602	0.0059	0.0427	-0.1367	-0.0103	0.0162	-0.006	-0.0028	-0.0116	0.0144	0.0327	-0.1496	0.1169
MRT	2B	65	65.4248	Qmrt.tamu.2B.65	IWB56961	65.3755	IWB25663	65.4662	5B	35	47.2094	Qmrt.tamu.5B.47	IWB3288	43.9052	IWB7411	47.5765	5.6873	3.9467	1.7406	1.8703	1.3322	0.5381	-0.0454	0.0125	-0.1462	-0.0639	0.0339	0.03	0.1094	-0.0409	-0.0686	0.1316	-0.096	-0.0357
MRT	5B	50	418.059	Qmrt.tamu.5B.418	IWB39735	418.012	IWA6837	421.644	5B	60	464.971	Qmrt.tamu.5B.465	IWB17929	464.889	IWB56833	465.995	5.5034	4.8968	0.6066	1.7202	1.6388	0.0814	0.0245	-0.0311	0.2366	-0.007	-0.031	0.038	0.1007	-0.0286	-0.0722	0.1119	-0.0439	-0.068
MRT	3D	80	603.202	Qmrt.tamu.3D.603	IWB48314	602.275	IWB49394	604.399	7A	85	67.672	Qmrt.tamu.7A.68	IWB72000	67.6719	IWB21914	67.6721	5.6908	3.9546	1.7362	1.8512	1.3723	0.479	-0.061	-0.043	-0.145	0.0115	-0.0046	-0.0069	-0.0101	-0.0009	0.011	0.1073	-0.0018	-0.1055
MRT	6B	50	28.2472	Qmrt.tamu.6B.28	IWA5942	22.1042	IWB67585	30.3243	7B	165	707.516	Qmrt.tamu.7B.708	IWA2824	706.815	IWB12168	707.91	6.6905	6.5719	0.1186	2.1603	2.1264	0.0339	-0.0191	0.0068	-0.1811	0.0439	-0.0385	-0.0055	0.0173	0.041	-0.0582	-0.0157	-0.0167	0.0323
MRV	3A	0	1.6228	Qmrv.tamu.3A.2	IWB26921	1.6228	IWB17619	6.89878	5A	180	665.029	Qmrv.tamu.5A.665	IWB66080	664.484	IWB27941	665.474	5.4076	1.9023	3.5053	3.0426	0.933	2.1096	-0.0062	0.008	0.3944	-0.2367	0.188	0.0487	-0.0103	-0.0451	0.0554	-0.4198	0.837	-0.4172
MRV	3B	0	13.7652	Qmrv.tamu.3B.14	IWB64711	13.7652	IWB60424	13.8142	5B	155	623.634	Qmrv.tamu.5B.624	IWB29993	623.221	IWB46219	624.695	5.3851	4.9175	0.4675	2.7146	2.4389	0.2758	-0.0073	0.223	-0.6455	0.0243	0.1654	-0.1896	-0.2691	0.2926	-0.0234	0.2594	-0.2524	-0.0069
MRV	5A	25	41.6316	Qmrv.tamu.5A.42	IWB59634	29.8925	IWB7718	46.2307	5B	185	678.384	Qmrv.tamu.5B.678	IWB26827	678.339	IWB34210	678.664	5.0216	2.4153	2.6063	2.2539	1.0417	1.2122	0.2411	0.1869	-0.4145	-0.2159	0.15	0.0659	-0.0676	0.3359	-0.2683	0.1156	-0.5961	0.4805
MRV	5B	210	700.763	Qmrv.tamu.5B.701	IWB60703	700.236	IWB36613	700.779	6B	55	32.1572	Qmrv.tamu.6B.32	IWB21500	31.0151	IWB65629	34.3411	6.3393	5.5645	0.7748	3.0677	2.669	0.3988	-0.0146	-0.2267	-0.666	-0.0232	0.0284	-0.0052	0.0965	-0.1535	0.0569	0.2233	-0.3607	0.1374
MRV	3A	330	710.869	Qmrv.tamu.3A.711	IWB26072	710.831	IWB58806	711.404	7B	5	1.97813	Qmrv.tamu.7B.2	IWB22624	1.25835	IWB1438	2.78688	5.2971	4.9349	0.3622	2.4534	2.3125	0.1408	0.2282	0.053	-0.6262	-0.1212	0.1726	-0.0515	0.0185	0.0129	-0.0314	-0.0355	-0.1685	0.204
MRW	1B	0	2.33263	Qmrw.tamu.1B.2	IWB9291	2.33263	IWB74219	4.34602	1D	65	58.8391	Qmrw.tamu.1D.59	IWB60722	53.8692	IWA7525	66.1993	5.0336	3.2801	1.7535	1.6952	1.0681	0.6272	0.1491	0.5739	-0.5013	0.2379	-0.1821	-0.0558	-0.1275	0.362	-0.2345	-0.1091	0.5022	-0.3931
MRW	1D	30	12.0906	Qmrw.tamu.1D.12	IWB42815	10.8457	IWB21001	12.5349	3A	350	727.303	Qmrw.tamu.3A.727	IWB32648	724.743	IWB19228	737.898	6.3282	1.1786	5.1495	1.9947	0.4135	1.5812	0.167	0.1474	0.309	0.0613	-0.0458	-0.0155	-0.2163	0.0417	0.1746	-0.6847	0.7781	-0.0934
MRW	1B	0	2.33263	Qmrw.tamu.1B.2	IWB9291	2.33263	IWB74219	4.34602	3B	215	819.69	Qmrw.tamu.3B.820	IWB6197	772.897	IWB12218	819.861	5.3837	0.8788	4.5049	2.0417	0.373	1.6687	0.0552	-0.1334	0.2977	0.3052	-0.1753	-0.1299	0.1084	0.1612	-0.2696	-0.7352	0.8054	-0.0703
MRW	3B	125	758.227	Qmrw.tamu.3B.758	IWB23678	756.824	IWB12091	759.169	3D	80	603.202	Qmrw.tamu.3D.603	IWB48314	602.275	IWB49394	604.399	5.1746	4.9777	0.1969	2.2411	2.1449	0.0962	0.0059	0.0077	0.7102	0.2922	-0.1486	-0.1436	-0.0692	0.3347	-0.2654	-0.1846	0.1695	0.0151
MRW	1D	55	50.4134	Qmrw.tamu.1D.50	IWB17147	38.6577	IWB9132	53.4568	4B	195	636.474	Qmrw.tamu.4B.636	IWB36159	621.437	IWB54786	636.779	5.155	3.2867	1.8682	2.0455	1.3373	0.7082	0.2448	-0.3967	0.5502	0.1999	-0.246	0.0461	-0.071	-0.1875	0.2586	-0.5051	0.025	0.4801
MRW	4D	5	424.97	Qmrw.tamu.4D.425	IWB55383	409.642	IWA3815	455.251	6B	105	158.815	Qmrw.tamu.6B.159	IWB72770	157.475	IWB10191	158.856	5.0295	1.7289	3.3007	1.879	0.7324	1.1466	0.3633	-0.0074	0.4157	-0.3435	0.3723	-0.0288	-0.152	0.2492	-0.0972	-0.5743	0.6918	-0.1175
MRW	5A	215	700.528	Qmrw.tamu.5A.701	IWB7297	700.372	IWB28861	702	7B	135	682.654	Qmrw.tamu.7B.683	IWB69489	656.509	IWB7845	684.397	5.221	2.9445	2.2766	1.9939	1.212	0.7819	0.0828	-0.1772	-0.5272	-0.2354	0.1571	0.0784	0.2595	-0.1404	-0.1191	0.5616	-0.4608	-0.1008
MRW	6A	85	101.983	Qmrw.tamu.6A.102	IWB29658	15.323	IWB23452	104.359	7B	150	697.475	Qmrw.tamu.7B.697	IWB3244	690.016	IWB9818	700.389	5.3265	2.2522	3.0743	1.8551	0.9084	0.9467	-0.0579	-0.2119	0.4566	-0.1722	0.2224	-0.0502	0.3149	-0.1075	-0.2074	-0.5104	0.62	-0.1096
MTI	1B	0	2.33263	Qmti.tamu.1B.2	IWB9291	2.33263	IWB74219	4.34602	1D	0	0.550997	Qmti.tamu.1D.1	IWB65713	0.550997	IWB74218	0.578135	5.5942	4.0288	1.5654	3.0571	1.854	1.203	-9.5236	2.4272	5.6939	-14.7956	9.3718	5.4238	7.9629	-4.6736	-3.2893	4.872	-0.8087	-4.0634
MTI	1A	30	20.3658	Qmti.tamu.1A.20	IWB36053	16.3908	IWB57361	20.9774	2A	240	755.793	Qmti.tamu.2A.756	IWB11978	755.789	IWB13459	755.795	5.6895	3.8873	1.8021	2.4613	1.7627	0.6986	-1.7661	-1.2539	5.6104	0.8568	-1.1559	0.2991	-4.6333	3.0829	1.5504	4.1899	0.4128	-4.6027
MTI	1D	60	55.3343	Qmti.tamu.1D.55	IWB60722	53.8692	IWA7525	66.1993	2B	55	41.6349	Qmti.tamu.2B.42	IWB70935	41.2	IWA1929	41.9611	5.2516	3.427	1.8246	2.4881	1.4618	1.0263	2.0319	-1.3023	-5.1701	1.8404	-2.8022	0.9618	0.1859	-2.9466	2.7606	-6.1383	3.1184	3.0199
MTI	2B	65	65.4248	Qmti.tamu.2B.65	IWB56961	65.3755	IWB25663	65.4662	3A	215	658.444	Qmti.tamu.3A.658	IWA4810	653.513	IWB12852	659.04	5.8324	3.5537	2.2787	2.8041	1.5623	1.2418	0.7253	-2.6853	5.479	2.4408	-5.0719	2.6312	0.6682	-2.1442	1.476	6.3037	-1.3973	-4.9064
MTI	3A	295	693.4	Qmti.tamu.3A.693	IWB73266	693.039	IWB29012	710.795	3B	35	25.691	Qmti.tamu.3B.26	IWB2169	25.2765	IWB59331	31.8137	5.0947	1.9437	3.151	1.936	0.8003	1.1357	-1.8613	-0.4358	-3.8208	-2.9258	-0.0605	2.9862	0.9081	-1.612	0.7039	-5.0107	-0.9669	5.9776
MTI	1B	120	643.669	Qmti.tamu.1B.644	IWB51317	641.199	IWB6778	673.743	3B	50	46.4844	Qmti.tamu.3B.46	IWB32390	45.2821	IWB37006	48.8889	5.6156	3.9458	1.6698	2.3745	1.5464	0.8281	-0.8689	-1.7412	5.332	-1.5906	2.6752	-1.0846	-1.0212	0.5468	0.4744	5.4986	-2.4354	-3.0632
MTI	3D	75	566.122	Qmti.tamu.3D.566	IWB8928	517.39	IWA1311	600.155	4A	150	602.12	Qmti.tamu.4A.602	IWB43375	597.694	IWA1691	605.73	8.5353	5.5723	2.963	3.3866	2.1049	1.2817	1.6714	0.1468	6.1507	0.7233	-0.2294	-0.4939	-0.9589	0.2432	0.7156	6.519	-1.6193	-4.8997
MTI	3A	190	531.918	Qmti.tamu.3A.532	IWB34921	515.9	IWB72223	532.646	4B	180	572.22	Qmti.tamu.4B.572	IWB26975	570.242	IWB50753	590.442	5.8175	2.0383	3.7792	2.1837	0.8185	1.3652	-0.0584	0.5741	3.8498	3.3058	-1.2877	-2.0182	-0.7568	0.0237	0.7331	5.9667	0.3574	-6.3241
MTI	2B	60	52.3776	Qmti.tamu.2B.52	IWB23172	50.2912	IWB4514	52.9117	5A	45	444.744	Qmti.tamu.5A.445	IWA5884	439.556	IWA8537	547.647	5.1205	3.3605	1.76	2.0478	1.3685	0.6793	-1.2546	0.696	-5.0465	0.8246	-3.5485	2.7239	-0.7006	0.1497	0.5509	-4.467	0.2599	4.2071
MTI	5B	100	544.132	Qmti.tamu.5B.544	IWB35312	542.953	IWA4566	547.405	5B	180	670.905	Qmti.tamu.5B.671	IWB6924	670.829	IWA37	678.338	5.0042	4.0522	0.9519	2.2966	1.7885	0.5081	0.0081	1.9361	5.6272	-0.2465	-1.427	1.6735	2.1736	0.0256	-2.1992	4.2394	-1.6448	-2.5946
MTI	2A	160	285.379	Qmti.tamu.2A.285	IWB26940	278.92	IWB45113	309.69	5B	185	678.384	Qmti.tamu.5B.678	IWB26827	678.339	IWB34210	678.664	6.5861	3.8564	2.7296	3.0473	1.6369	1.4105	-1.4667	1.1778	5.3956	-4.5874	1.1993	3.3882	1.7765	-0.4022	-1.3743	6.9235	-2.26	-4.6635
MTI	5A	95	553.574	Qmti.tamu.5A.554	IWB6371	552.515	IWB4234	559.068	5B	220	704.752	Qmti.tamu.5B.705	IWB65485	703.501	IWB53784	704.822	5.0658	3.2565	1.8093	2.327	1.4059	0.9211	1.958	-0.2503	5.0093	-0.4211	0.6295	-0.2083	-0.7336	-1.0277	1.7613	5.645	-1.9769	-3.6681
MTI	3B	35	25.691	Qmti.tamu.3B.26	IWB2169	25.2765	IWB59331	31.8137	6B	110	246.467	Qmti.tamu.6B.246	IWB11133	234.56	IWB59537	250.783	6.2539	2.9657	3.2882	3.0381	1.2825	1.7556	-0.8971	2.192	-4.8673	-0.0179	-0.977	0.9949	-0.4088	-0.665	1.0738	-7.9192	2.5962	5.3231
MTI	1A	160	473.344	Qmti.tamu.1A.473	IWB21382	471.7	IWB44485	474.642	6B	180	698.557	Qmti.tamu.6B.699	IWB4109	691.341	IWB535	698.993	5.6016	3.991	1.6106	2.4809	1.7864	0.6945	-1.7279	-0.6366	5.631	-0.3488	0.9231	-0.5743	-0.4074	-1.3371	1.7444	4.4619	-0.2605	-4.2014
MTI	3A	65	253.797	Qmti.tamu.3A.254	IWB70483	249.855	IWB34921	515.9	6D	5	2.43248	Qmti.tamu.6D.2	IWB55116	2.32151	IWB4286	5.0646	5.244	3.0107	2.2333	2.3215	1.3013	1.0202	0.2559	1.8192	4.8002	-1.6981	0.6328	1.0653	-3.2139	3.2583	-0.0444	5.4976	-0.6711	-4.8265
MTI	4B	135	405.59	Qmti.tamu.4B.406	IWB26862	286.125	IWB61082	406.331	6D	100	424.91	Qmti.tamu.6D.425	IWB6782	422.204	IWB44754	462.84	5.4346	3.7297	1.7048	2.2496	1.4794	0.7702	0.063	-1.7367	5.1444	2.0039	-1.3693	-0.6346	0.4756	-1.7183	1.2428	5.0183	-1.2002	-3.8181
MTI	3D	80	603.202	Qmti.tamu.3D.603	IWB48314	602.275	IWB49394	604.399	7A	65	46.6476	Qmti.tamu.7A.47	IWB1686	33.4818	IWB58849	47.5161	5.8385	4.1117	1.7268	2.4116	1.6888	0.7228	2.9586	-1.1728	5.5521	1.8578	-0.4298	-1.428	0.8661	-2.3949	1.5288	4.6069	-0.4448	-4.1621
MTI	5B	0	11.4577	Qmti.tamu.5B.11	IWB60572	11.4577	IWB61567	12.2627	7A	120	143.103	Qmti.tamu.7A.143	IWB36370	85.4147	IWA3187	157.403	5.1989	4.5038	0.6951	1.9996	1.8738	0.1258	-1.5001	-1.1759	-5.8588	-1.1502	3.146	-1.9958	-3.0018	2.326	0.6758	0.784	-2.4502	1.6662
MTI	6B	80	58.6265	Qmti.tamu.6B.59	IWB25627	55.9978	IWB9007	93.8227	7A	130	285.584	Qmti.tamu.7A.286	IWB64116	285.171	IWB24311	285.607	5.646	2.4103	3.2357	2.0807	1.0989	0.9818	1.3004	-1.1771	-4.4499	1.0376	-0.3721	-0.6655	-2.7527	2.1369	0.6158	-2.9509	-2.9976	5.9485
MTI	7A	25	26.8717	Qmti.tamu.7A.27	IWB49797	25.923	IWB35150	27.2883	7B	85	591.111	Qmti.tamu.7B.591	IWB35405	589.711	IWB25170	622.685	6.1597	1.8691	4.2905	2.7672	0.8023	1.9649	-1.5433	1.3053	3.7466	-3.1787	1.4842	1.6945	3.3019	-1.5419	-1.76	7.5165	-0.792	-6.7245
MTS	2A	205	729.114	Qmts.tamu.2A.729	IWA1960	728.758	IWB10182	729.208	2B	50	38.5888	Qmts.tamu.2B.39	IWA8124	28.3668	IWB6528	41.1443	6.7603	1.8863	4.874	4.0426	0.929	3.1136	-0.001	0.0354	0.0672	-0.0312	0.003	0.0282	0.0424	-0.0118	-0.0307	0.1694	-0.051	-0.1184
MTS	1A	10	8.13839	Qmts.tamu.1A.8	IWA3181	7.18441	IWB29601	10.1277	2B	55	41.6349	Qmts.tamu.2B.42	IWB70935	41.2	IWA1929	41.9611	5.3655	2.5176	2.8479	3.0317	1.1696	1.862	0.0557	0.0524	-0.0759	0.043	-0.0334	-0.0096	0.0582	-0.021	-0.0372	-0.1346	0.0821	0.0525
MTS	2A	195	719.081	Qmts.tamu.2A.719	IWB12522	718.839	IWB973	719.471	3A	205	642.162	Qmts.tamu.3A.642	IWB8470	639.148	IWB56625	650.042	5.1519	2.2357	2.9162	3.2819	1.1545	2.1273	-0.0068	0.0113	0.0748	0.0219	-0.0154	-0.0065	-0.047	0.0592	-0.0121	0.1413	-0.0524	-0.0889
MTS	2A	5	9.73222	Qmts.tamu.2A.10	IWB57879	7.68757	IWB100	10.9931	5A	165	655.309	Qmts.tamu.5A.655	IWB64718	654.098	IWB59439	657.381	5.1255	4.0084	1.1171	3.1146	2.2154	0.8992	0.0205	0.0179	0.104	0.0528	-0.0062	-0.0466	0.0049	0.0051	-0.0101	0.0937	-0.0461	-0.0475
MTS	3B	50	46.4844	Qmts.tamu.3B.46	IWB32390	45.2821	IWB37006	48.8889	5B	150	618.97	Qmts.tamu.5B.619	IWA8250	618.124	IWA3500	620.018	5.3378	3.2984	2.0394	3.4036	1.871	1.5326	-0.0257	0.0137	-0.0969	-0.0748	0.0208	0.054	0.0403	-0.0182	-0.0221	-0.1207	0.0899	0.0308
MTS	1A	0	2.37821	Qmts.tamu.1A.2	IWB12147	2.37821	IWB7628	3.11837	5B	220	704.752	Qmts.tamu.5B.705	IWB65485	703.501	IWB53784	704.822	6.6858	2.1306	4.5552	4.8791	1.2122	3.6669	0.0294	-0.0088	-0.0771	0.011	0.0013	-0.0123	0.0852	-0.0398	-0.0455	-0.1828	0.13	0.0528
MTS	2A	75	51.0136	Qmts.tamu.2A.51	IWA4830	50.9164	IWB24504	53.9216	6B	185	703.472	Qmts.tamu.6B.703	IWB33667	701.39	IWB28256	704.451	5.0439	2.2748	2.7691	2.6245	1.2441	1.3805	-0.0019	-0.0103	-0.078	-0.0012	0.0053	-0.0041	-0.058	0.0284	0.0296	-0.0983	-0.0048	0.1031
MTS	5B	10	16.9452	Qmts.tamu.5B.17	IWB24915	15.3222	IWB26051	19.4388	6D	50	43.715	Qmts.tamu.6D.44	IWB6829	24.0034	IWB26736	391.925	5.1315	2.6637	2.4678	2.5078	1.2894	1.2184	0.0202	0.0241	-0.0795	0.0671	-0.0472	-0.0199	0.0164	-0.02	0.0035	-0.0931	0.0969	-0.0038
MTV	2B	65	65.4248	Qmtv.tamu.2B.65	IWB56961	65.3755	IWB25663	65.4662	3A	215	658.444	Qmtv.tamu.3A.658	IWA4810	653.513	IWB12852	659.04	5.0305	3.2769	1.7536	2.1324	1.4414	0.6911	-0.0451	-0.2817	0.532	0.2836	-0.3362	0.0526	0.1291	-0.2347	0.1056	0.3344	0.1578	-0.4923
MTV	1D	100	265.954	Qmtv.tamu.1D.266	IWB7344	206.101	IWB18403	407.809	3A	360	737.461	Qmtv.tamu.3A.737	IWB32648	724.743	IWB19228	737.898	5.7212	2.691	3.0302	2.2222	1.0526	1.1697	-0.0133	0.0037	-0.4455	0.0856	-0.0993	0.0138	-0.0014	-0.0652	0.0666	0.2856	-0.6608	0.3752
MTV	3B	65	540.083	Qmtv.tamu.3B.540	IWB27319	539.56	IWB35680	542.735	4B	165	563.128	Qmtv.tamu.4B.563	IWB70892	558.597	IWB3280	570.086	5.0577	4.0727	0.985	1.7851	1.5117	0.2735	-0.046	-0.0117	0.5358	-0.228	0.2508	-0.0227	-0.1423	0.06	0.0823	0.2477	0.0488	-0.2965
MTV	2A	205	729.114	Qmtv.tamu.2A.729	IWA1960	728.758	IWB10182	729.208	4B	230	660.753	Qmtv.tamu.4B.661	IWB23476	660.657	IWB57507	662.413	5.8451	5.7118	0.1333	2.6311	2.574	0.0572	-0.2235	-0.2862	-0.689	0.0182	0.0732	-0.0914	0.0669	-0.2414	0.1745	0.0279	-0.1412	0.1133
MTV	5B	25	30.3337	Qmtv.tamu.5B.30	IWB34584	24.9188	IWB8792	41.276	6A	15	13.5323	Qmtv.tamu.6A.14	IWB9898	12.1381	IWB7466	13.8065	5.8181	4.1453	1.6728	2.3588	1.6231	0.7357	-0.0125	0.1052	-0.5503	0.0615	-0.0101	-0.0514	-0.3467	-0.045	0.3917	0.3903	-0.4976	0.1073
MTV	5B	90	531.727	Qmtv.tamu.5B.532	IWB44284	531.54	IWA6721	534.323	7A	90	68.0858	Qmtv.tamu.7A.68	IWB71928	68.0494	IWB34069	68.0885	6.0076	4.4837	1.5239	2.7446	1.9766	0.768	0.1259	-0.3655	0.6097	0.1141	-0.2336	0.1195	0.144	-0.2564	0.1125	-0.4595	0.4625	-0.003
MTV	3A	345	717.354	Qmtv.tamu.3A.717	IWB58806	711.404	IWB10899	717.654	7B	15	5.54883	Qmtv.tamu.7B.6	IWB65277	3.84892	IWA1525	5.92294	5.0231	4.6523	0.3707	2.1437	2.0344	0.1093	0.0532	-0.0752	-0.622	-0.1126	-0.1211	0.2338	0.1027	0.0429	-0.1456	0.0184	-0.1992	0.1808
MTW	2D	80	117.918	Qmtw.tamu.2D.118	IWB5428	114.548	IWB28381	238.48	3B	55	165.98	Qmtw.tamu.3B.166	IWB8392	160.842	IWB11647	177.968	5.7636	4.3638	1.3998	1.7343	1.3497	0.3847	-0.02	0.1271	0.5711	-0.1666	0.016	0.1505	0.0165	-0.1187	0.1022	0.3149	-0.4128	0.0979
MTW	1A	210	575.771	Qmtw.tamu.1A.576	IWB54198	575.364	IWB3070	576.637	6A	105	579.809	Qmtw.tamu.6A.580	IWB74549	550.284	IWA259	580.198	5.3456	4.5501	0.7955	1.6594	1.4436	0.2158	-0.04	-0.0434	0.5894	0.1228	-0.1216	-0.0012	-0.2725	0.056	0.2165	0.1407	-0.3136	0.1729
MTXI	1B	0	2.33263	Qmtxi.tamu.1B.2	IWB9291	2.33263	IWB74219	4.34602	1D	0	0.550997	Qmtxi.tamu.1D.1	IWB65713	0.550997	IWB74218	0.578135	5.6338	4.1266	1.5072	3.1093	1.9094	1.1999	-9.1463	2.3998	5.7522	-15.173	8.9944	6.1785	7.9903	-4.6463	-3.3439	4.8137	-0.867	-3.9467
MTXI	1A	30	20.3658	Qmtxi.tamu.1A.20	IWB36053	16.3908	IWB57361	20.9774	2A	240	755.793	Qmtxi.tamu.2A.756	IWB11978	755.789	IWB13459	755.795	5.729	4.0105	1.7185	2.492	1.8213	0.6707	-1.5147	-1.2939	5.6828	0.6079	-1.4058	0.7979	-4.5932	3.123	1.4702	4.1092	0.3429	-4.4521
MTXI	1D	60	55.3343	Qmtxi.tamu.1D.55	IWB60722	53.8692	IWA7525	66.1993	2B	55	41.6349	Qmtxi.tamu.2B.42	IWB70935	41.2	IWA1929	41.9611	5.1746	3.2666	1.908	2.4651	1.4014	1.0637	1.1327	-1.3617	-5.0365	2.7157	-1.9419	-0.7738	0.2449	-2.8893	2.6444	-6.2235	3.0173	3.2062
MTXI	2B	65	65.4248	Qmtxi.tamu.2B.65	IWB56961	65.3755	IWB25663	65.4662	3A	215	658.444	Qmtxi.tamu.3A.658	IWA4810	653.513	IWB12852	659.04	5.8904	3.6432	2.2472	2.8198	1.5961	1.2237	1.1158	-2.966	5.5416	2.049	-5.4607	3.4116	0.9466	-1.8694	0.9228	6.2447	-1.4527	-4.7919
MTXI	3A	295	693.4	Qmtxi.tamu.3A.693	IWB73266	693.039	IWB29012	710.795	3B	35	25.691	Qmtxi.tamu.3B.26	IWB2169	25.2765	IWB59331	31.8137	5.0282	2.0841	2.9441	1.9332	0.8583	1.0749	-1.8987	-0.9355	-3.952	-2.8896	-0.0217	2.9113	1.3971	-1.1161	-0.281	-4.8884	-0.8367	5.7251
MTXI	1B	120	643.669	Qmtxi.tamu.1B.644	IWB51317	641.199	IWB6778	673.743	3B	50	46.4844	Qmtxi.tamu.3B.46	IWB32390	45.2821	IWB37006	48.8889	5.4663	3.2439	2.2224	2.3106	1.2709	1.0397	-0.3988	-1.9965	4.8086	-2.0622	2.2294	-0.1672	-0.7681	0.8053	-0.0372	6.022	-1.9366	-4.0854
MTXI	3D	80	603.202	Qmtxi.tamu.3D.603	IWB48314	602.275	IWB49394	604.399	4A	150	602.12	Qmtxi.tamu.4A.602	IWB43375	597.694	IWA1691	605.73	8.7532	6.316	2.4371	3.7736	2.527	1.2466	2.2599	0.3768	6.6842	1.0966	-0.7309	-0.3658	-0.4549	0.2834	0.1716	6.5655	-2.3865	-4.1789
MTXI	3A	190	531.918	Qmtxi.tamu.3A.532	IWB34921	515.9	IWB72223	532.646	4B	180	572.22	Qmtxi.tamu.4B.572	IWB26975	570.242	IWB50753	590.442	5.6536	2.2701	3.3834	2.1676	0.9197	1.2479	0.1067	0.6074	4.0606	3.1719	-1.4596	-1.7123	-0.7936	-0.0092	0.8028	5.7892	0.1409	-5.9302
MTXI	2B	60	52.3776	Qmtxi.tamu.2B.52	IWB23172	50.2912	IWB4514	52.9117	5A	45	444.744	Qmtxi.tamu.5A.445	IWA5884	439.556	IWA8537	547.647	5.218	3.0785	2.1395	2.0469	1.253	0.7939	-1.0774	0.5374	-4.8032	0.6368	-3.7193	3.0825	-0.549	0.3051	0.2438	-4.7037	0.0324	4.6713
MTXI	1B	85	580.492	Qmtxi.tamu.1B.580	IWB43219	575.864	IWB596	581.21	5B	180	670.905	Qmtxi.tamu.5B.671	IWB6924	670.829	IWA37	678.338	5.0305	2.5066	2.5239	2.4782	1.1715	1.3067	-2.1693	1.403	-4.5413	-3.28	1.9541	1.3259	1.1678	0.296	-1.4639	-6.4745	1.3747	5.0998
MTXI	2A	160	285.379	Qmtxi.tamu.2A.285	IWB26940	278.92	IWB45113	309.69	5B	185	678.384	Qmtxi.tamu.5B.678	IWB26827	678.339	IWB34210	678.664	6.6404	4.1011	2.5393	3.0933	1.7516	1.3416	-1.3031	1.3081	5.5569	-4.7695	1.0345	3.735	1.6445	-0.5329	-1.1116	6.7654	-2.4117	-4.3537
MTXI	5A	95	553.574	Qmtxi.tamu.5A.554	IWB6371	552.515	IWB4234	559.068	5B	220	704.752	Qmtxi.tamu.5B.705	IWB65485	703.501	IWB53784	704.822	5.1414	3.4631	1.6782	2.3697	1.5042	0.8655	1.9741	-0.3466	5.1583	-0.4313	0.614	-0.1827	-0.6411	-0.9337	1.5748	5.4907	-2.1284	-3.3622
MTXI	3B	35	25.691	Qmtxi.tamu.3B.26	IWB2169	25.2765	IWB59331	31.8137	6B	110	246.467	Qmtxi.tamu.6B.246	IWB11133	234.56	IWB59537	250.783	6.3845	2.7085	3.676	3.0899	1.1709	1.9189	-1.3302	2.1064	-4.6276	0.4065	-0.5502	0.1437	-0.3238	-0.5784	0.9023	-8.1619	2.3605	5.8014
MTXI	1A	160	473.344	Qmtxi.tamu.1A.473	IWB21382	471.7	IWB44485	474.642	6B	180	698.557	Qmtxi.tamu.6B.699	IWB4109	691.341	IWB535	698.993	5.6233	3.8114	1.8119	2.4899	1.7185	0.7714	-1.3231	-1.0651	5.4915	-0.7416	0.5296	0.212	0.0202	-0.9147	0.8945	4.5935	-0.1294	-4.4641
MTXI	3A	65	253.797	Qmtxi.tamu.3A.254	IWB70483	249.855	IWB34921	515.9	6D	5	2.43248	Qmtxi.tamu.6D.2	IWB55116	2.32151	IWB4286	5.0646	5.2986	3.7855	1.5131	2.4062	1.6523	0.7539	0.7179	2.0706	5.3795	-2.15	0.1811	1.9689	-3.4587	3.0135	0.4451	4.9286	-1.2411	-3.6875
MTXI	4B	135	405.59	Qmtxi.tamu.4B.406	IWB26862	286.125	IWB61082	406.331	6D	100	424.91	Qmtxi.tamu.6D.425	IWB6782	422.204	IWB44754	462.84	5.536	4.0437	1.4923	2.306	1.6104	0.6956	0.1277	-1.6633	5.3437	1.9374	-1.4345	-0.5029	0.4054	-1.7844	1.3791	4.8159	-1.3951	-3.4208
MTXI	3D	80	603.202	Qmtxi.tamu.3D.603	IWB48314	602.275	IWB49394	604.399	7A	65	46.6476	Qmtxi.tamu.7A.47	IWB1686	33.4818	IWB58849	47.5161	5.8829	4.196	1.6869	2.4445	1.7321	0.7124	3.1547	-1.0647	5.5931	1.6607	-0.6292	-1.0315	0.7567	-2.5011	1.7444	4.5657	-0.4822	-4.0836
MTXI	5B	0	11.4577	Qmtxi.tamu.5B.11	IWB60572	11.4577	IWB61567	12.2627	7A	120	143.103	Qmtxi.tamu.7A.143	IWB36370	85.4147	IWA3187	157.403	5.1924	4.4122	0.7802	1.9855	1.8378	0.1477	-1.5124	-1.003	-5.7762	-1.1427	3.1546	-2.0118	-3.1787	2.1535	1.0253	0.7518	-2.5194	1.7676
MTXI	6B	80	58.6265	Qmtxi.tamu.6B.59	IWB25627	55.9978	IWB9007	93.8227	7A	130	285.584	Qmtxi.tamu.7A.286	IWB64116	285.171	IWB24311	285.607	5.4813	2.6887	2.7926	2.0708	1.2277	0.8431	1.317	-1.1339	-4.6837	1.0181	-0.3863	-0.6319	-2.7974	2.0929	0.7045	-2.7247	-2.7619	5.4866
MTXI	7A	25	26.8717	Qmtxi.tamu.7A.27	IWB49797	25.923	IWB35150	27.2883	7B	85	591.111	Qmtxi.tamu.7B.591	IWB35405	589.711	IWB25170	622.685	5.9865	2.1118	3.8746	2.7312	0.9093	1.8219	-1.4191	1.4162	3.9776	-3.3081	1.3692	1.939	3.1841	-1.6491	-1.535	7.2922	-1.0123	-6.2799
MTXV	1D	100	265.954	Qmtxv.tamu.1D.266	IWB7344	206.101	IWB18403	407.809	3A	360	737.461	Qmtxv.tamu.3A.737	IWB32648	724.743	IWB19228	737.898	5.4713	2.1901	3.2812	2.1259	0.8446	1.2813	-0.0206	-0.0275	-0.4059	0.0464	-0.0922	0.0458	-0.0605	-0.0408	0.1013	0.3708	-0.707	0.3362
MTXV	3D	85	613.295	Qmtxv.tamu.3D.613	IWA7274	612.902	IWB64548	613.388	4A	170	613.944	Qmtxv.tamu.4A.614	IWB61650	607.311	IWB74052	614.411	5.9736	4.4691	1.5045	2.5674	2.016	0.5514	0.0571	0.0995	0.6248	-0.1267	-0.0236	0.1503	0.0081	-0.1167	0.1086	0.3789	0.0446	-0.4235
MTXV	3B	65	540.083	Qmtxv.tamu.3B.540	IWB27319	539.56	IWB35680	542.735	4B	150	517.573	Qmtxv.tamu.4B.518	IWB61082	406.331	IWB70894	558.596	5.0795	3.642	1.4376	1.7874	1.3926	0.3949	0.0253	-0.0296	0.5247	-0.1149	0.1922	-0.0774	-0.0229	-0.0275	0.0505	0.3032	0.0683	-0.3715
MTXV	2A	205	729.114	Qmtxv.tamu.2A.729	IWA1960	728.758	IWB10182	729.208	4B	230	660.753	Qmtxv.tamu.4B.661	IWB23476	660.657	IWB57507	662.413	5.4097	5.2698	0.1398	2.4388	2.3684	0.0704	-0.1334	-0.2161	-0.674	0.1789	-0.0195	-0.1594	0.2168	-0.315	0.0982	0.0645	-0.1595	0.0949
MTXV	5B	25	30.3337	Qmtxv.tamu.5B.30	IWB34584	24.9188	IWB8792	41.276	6A	15	13.5323	Qmtxv.tamu.6A.14	IWB9898	12.1381	IWB7466	13.8065	6.0567	4.6721	1.3846	2.4388	1.837	0.6018	-0.0419	0.0734	-0.5962	0.0308	0.0083	-0.0391	-0.4066	-0.0083	0.4149	0.3392	-0.4672	0.128
MTXV	2B	30	26.1515	Qmtxv.tamu.2B.26	IWB4667	26.1017	IWB41081	26.2972	6B	50	28.2472	Qmtxv.tamu.6B.28	IWA5942	22.1042	IWB67585	30.3243	5.1048	3.1862	1.9186	1.9592	1.2329	0.7264	-0.1091	-0.2874	0.4968	0.1362	0.1168	-0.2529	0.0039	-0.1355	0.1316	-0.1431	0.5116	-0.3685
MTXV	5B	90	531.727	Qmtxv.tamu.5B.532	IWB44284	531.54	IWA6721	534.323	7A	90	68.0858	Qmtxv.tamu.7A.68	IWB71928	68.0494	IWB34069	68.0885	6.1277	4.9626	1.165	2.7408	2.1602	0.5806	0.1557	-0.3797	0.6493	0.164	-0.2605	0.0965	0.0787	-0.2494	0.1707	-0.3797	0.4293	-0.0496
MTXV	3A	345	717.354	Qmtxv.tamu.3A.717	IWB58806	711.404	IWB10899	717.654	7B	15	5.54883	Qmtxv.tamu.7B.6	IWB65277	3.84892	IWA1525	5.92294	5.8712	5.4301	0.4411	2.4452	2.3188	0.1264	0.1005	-0.1287	-0.6787	-0.0444	-0.1698	0.2142	-0.0081	0.1051	-0.0969	-0.0778	-0.1482	0.226
MTXV	2D	140	397.548	Qmtxv.tamu.2D.398	IWB29942	390.704	IWB53040	635.595	7B	135	682.654	Qmtxv.tamu.7B.683	IWB69489	656.509	IWB7845	684.397	5.0074	4.6062	0.4012	2.0824	1.9495	0.1328	-0.1921	-0.1277	0.6151	-0.0825	0.0596	0.0229	0.0335	0.0725	-0.106	0.0791	0.1452	-0.2243
MTXW	2B	90	147.508	Qmtxw.tamu.2B.148	IWB7346	92.997	IWB47487	154.251	5B	45	398.566	Qmtxw.tamu.5B.399	IWB8505	397.435	IWB1103	400.451	5.3124	0.3103	5.0021	2.0286	0.0999	1.9288	0.0092	0.0805	-0.1504	-0.0623	-0.2038	0.2661	-0.0203	-0.0543	0.0746	0.8608	-0.1034	-0.7574
MTXW	6B	55	32.1572	Qmtxw.tamu.6B.32	IWB21500	31.0151	IWB65629	34.3411	7B	190	749.422	Qmtxw.tamu.7B.749	IWB64853	749.422	IWB22589	749.422	6.2816	5.9187	0.3629	2.1204	1.9838	0.1366	-0.0852	0.0104	-0.665	-0.0011	0.1585	-0.1574	0.3106	-0.1062	-0.2043	0.2335	-0.0571	-0.1764
SKW	1B	165	675.677	Qskw.tamu.1B.676	IWB73714	675.56	IWB52979	682.47	2D	80	117.918	Qskw.tamu.2D.118	IWB5428	114.548	IWB28381	238.48	5.3467	4.0054	1.3412	2.1503	1.6749	0.4755	-0.0284	0.0488	0.2853	0.1124	-0.0855	-0.0269	0.1608	-0.0585	-0.1023	-0.1861	0.1753	0.0108
SKW	2B	120	695.136	Qskw.tamu.2B.695	IWB66366	694.057	IWB40157	695.373	2D	140	397.548	Qskw.tamu.2D.398	IWB29942	390.704	IWB53040	635.595	5.8296	3.4626	2.3669	2.3938	1.4509	0.9429	0.1681	-0.0659	0.2635	-0.0777	0.0298	0.0479	0.1187	-0.1926	0.0738	-0.1909	-0.105	0.2959
SKW	2A	80	55.8886	Qskw.tamu.2A.56	IWB24504	53.9216	IWB51951	58.6708	3B	25	21.2845	Qskw.tamu.3B.21	IWB67002	20.8298	IWB7648	21.3438	5.2946	4.2043	1.0902	2.1391	1.7885	0.3506	0.0691	0.0429	-0.2945	-0.1227	0.115	0.0078	-0.1119	0.0626	0.0493	0.1855	-0.108	-0.0775
SKW	5A	25	41.6316	Qskw.tamu.5A.42	IWB59634	29.8925	IWB7718	46.2307	5B	100	544.132	Qskw.tamu.5B.544	IWB35312	542.953	IWA4566	547.405	5.008	2.6052	2.4028	1.6148	0.9211	0.6937	0.2507	0.049	-0.2096	-0.2417	0.4554	-0.2137	-0.0559	0.0337	0.0222	0.2551	-0.1279	-0.1273
SKW	2B	170	778.064	Qskw.tamu.2B.778	IWB24454	777.144	IWB27094	778.848	5D	0	440.647	Qskw.tamu.5D.441	IWB33531	440.647	IWB6794	440.648	5.1255	3.3833	1.7422	1.9168	1.3601	0.5567	-0.0737	0.1896	0.2555	0.0075	-0.1029	0.0954	-0.1706	0.0211	0.1495	-0.2021	-0.0018	0.2039
SKW	2B	120	695.136	Qskw.tamu.2B.695	IWB66366	694.057	IWB40157	695.373	6D	90	377.809	Qskw.tamu.6D.378	IWB6829	24.0034	IWB26736	391.925	5.6244	2.7911	2.8333	2.1533	1.1249	1.0284	0.1973	-0.0588	-0.235	-0.1056	0.0571	0.0485	0.0407	-0.0485	0.0078	0.2328	-0.3018	0.069
SKW	5A	40	433.724	Qskw.tamu.5A.434	IWB65499	430.247	IWA5033	438.267	6D	95	409.379	Qskw.tamu.6D.409	IWB579	398.231	IWB43305	413.991	5.1959	4.8359	0.36	2.1634	2.0446	0.1188	0.0157	-0.0159	-0.3159	-0.0294	0.0418	-0.0125	0.0245	0.0178	-0.0423	0.0567	0.0523	-0.1091
SKW	6B	200	715.735	Qskw.tamu.6B.716	IWB47836	715.706	IWB8909	715.774	7A	90	68.0858	Qskw.tamu.7A.68	IWB71928	68.0494	IWB34069	68.0885	5.135	2.5079	2.6271	1.8928	1.0172	0.8756	-0.1063	0.0935	0.222	0.0667	-0.0548	-0.012	-0.0526	0.0195	0.033	-0.2878	0.1076	0.1803
SKW	5B	225	708.236	Qskw.tamu.5B.708	IWB59208	707.7	IWB28598	711.583	7B	5	1.97813	Qskw.tamu.7B.2	IWB22624	1.25835	IWB1438	2.78688	5.6491	4.7136	0.9355	2.2108	1.9183	0.2924	0.0891	0.1161	0.3061	-0.1591	0.03	0.1291	-0.1665	0.1494	0.0171	-0.1383	-0.0075	0.1459
SKW	6B	90	121.724	Qskw.tamu.6B.122	IWB11233	121.49	IWB59111	122.968	7B	55	70.4368	Qskw.tamu.7B.70	IWB40127	67.3363	IWB58046	88.5585	5.2	5.092	0.108	2.2067	2.1663	0.0404	-0.0999	-0.0147	0.3294	0.0422	0.2246	-0.2668	-0.065	-0.0531	0.1181	0.0412	-0.0621	0.0209
SKW	5D	65	554.353	Qskw.tamu.5D.554	IWB10788	553.966	IWB45591	554.472	7B	135	682.654	Qskw.tamu.7B.683	IWB69489	656.509	IWB7845	684.397	5.3565	4.5128	0.8438	2.2799	2.0057	0.2742	-0.1699	-0.1608	-0.3052	-0.033	0.0429	-0.0099	0.0939	-0.0987	0.0048	0.1476	-0.1437	-0.0039
SKW	7A	10	11.8085	Qskw.tamu.7A.12	IWB55317	11.1003	IWB58414	12.1773	7B	175	719.216	Qskw.tamu.7B.719	IWB53759	719.083	IWB7576	720.065	5.6472	3.2564	2.3907	2.2775	1.3905	0.887	0.0337	-0.1218	0.2591	0.1153	-0.0565	-0.0588	0.0152	-0.0195	0.0043	-0.246	0.261	-0.015
SKW	3B	215	819.69	Qskw.tamu.3B.820	IWB6197	772.897	IWB12218	819.861	7D	100	109.161	Qskw.tamu.7D.109	IWB41108	54.9986	IWA1323	112.052	5.0382	4.4932	0.545	2.0276	1.8568	0.1708	0.0867	0.0434	-0.3012	-0.0845	0.1617	-0.0772	-0.0559	0.0202	0.0357	0.1185	-0.014	-0.1045
FPC	1A	5	6.28431	Qfpc.tamu.1A.6	IWB13355	4.06333	IWB12354	6.65448	1D	50	34.5856	Qfpc.tamu.1D.35	IWB25219	33.7564	IWB9563	38.581	5.0249	3.2929	1.732	2.3315	1.7244	0.6071	-0.0097	-0.0403	-0.089	-0.0207	0.0024	0.0183	-0.0137	-0.0011	0.0147	-0.0113	-0.0596	0.0709
FPC	1A	165	501.025	Qfpc.tamu.1A.501	IWB2320	500.981	IWA163	501.031	3A	215	658.444	Qfpc.tamu.3A.658	IWA4810	653.513	IWB12852	659.04	5.5395	2.9207	2.6188	2.5283	1.5662	0.9622	-0.0485	-0.0321	-0.0842	-0.0009	0.0266	-0.0256	0.0094	-0.0267	0.0172	-0.0355	-0.0574	0.0929
FPC	2B	65	65.4248	Qfpc.tamu.2B.65	IWB56961	65.3755	IWB25663	65.4662	3A	215	658.444	Qfpc.tamu.3A.658	IWA4810	653.513	IWB12852	659.04	6.6424	4.7474	1.895	3.0983	2.3253	0.7729	0.0743	-0.0578	0.1088	0.0732	-0.073	-0.0002	-0.0083	-0.0212	0.0295	0.0672	0.012	-0.0792
FPC	2D	0	27.4946	Qfpc.tamu.2D.27	IWB17603	27.4946	IWB7313	27.6513	4B	185	597.349	Qfpc.tamu.4B.597	IWB50753	590.442	IWB30986	601.539	7.2091	3.6581	3.551	3.4695	1.8782	1.5913	-0.0497	-0.0073	-0.0922	-0.1181	0.0738	0.0443	-0.019	-0.0019	0.021	-0.1109	0.0149	0.096
FPC	2A	5	9.73222	Qfpc.tamu.2A.10	IWB57879	7.68757	IWB100	10.9931	5B	30	37.3661	Qfpc.tamu.5B.37	IWB34584	24.9188	IWB8792	41.276	5.8798	2.8313	3.0485	2.3494	1.3027	1.0468	-0.0196	-0.0008	0.0765	0.0236	-0.0162	-0.0074	-0.0151	-0.0227	0.0378	0.0729	0.0189	-0.0917
FPC	4A	0	6.93581	Qfpc.tamu.4A.7	IWB54256	6.93581	IWB68921	7.32498	5B	65	472.631	Qfpc.tamu.5B.473	IWB3607	471.131	IWB1659	472.681	5.4533	4.2793	1.174	2.8411	2.3499	0.4912	0.0512	0.0386	-0.1024	0.0465	-0.0124	-0.0342	0.0224	-0.0285	0.0061	0.0078	-0.0616	0.0538
FPC	3B	55	165.98	Qfpc.tamu.3B.166	IWB8392	160.842	IWB11647	177.968	5B	155	623.634	Qfpc.tamu.5B.624	IWB29993	623.221	IWB46219	624.695	7.5649	4.3311	3.2338	3.5233	2.295	1.2283	-0.0333	0.0347	0.1027	-0.0136	-0.0016	0.0152	0.0374	-0.0412	0.0038	0.0624	0.0434	-0.1058
FPC	2A	255	770.263	Qfpc.tamu.2A.770	IWB11240	767.792	IWB5416	770.358	6A	170	617.005	Qfpc.tamu.6A.617	IWB29615	616.924	IWB12441	617.049	5.3134	4.3127	1.0007	2.8023	2.3702	0.4321	-0.0321	0.0107	-0.1032	-0.0277	-0.0042	0.0319	0.0257	-0.0325	0.0068	-0.0502	-0.0062	0.0564
FPC	4D	10	455.436	Qfpc.tamu.4D.455	IWB7083	455.344	IWA286	455.489	6B	85	113.099	Qfpc.tamu.6B.113	IWB71454	112.906	IWB9751	113.453	5.7723	3.8942	1.8781	2.682	2.0068	0.6751	0.0329	0.0455	-0.097	0.0174	-0.0317	0.0142	-0.0092	-0.0093	0.0185	-0.02	-0.0555	0.0756
FPC	3B	35	25.691	Qfpc.tamu.3B.26	IWB2169	25.2765	IWB59331	31.8137	6B	110	246.467	Qfpc.tamu.6B.246	IWB11133	234.56	IWB59537	250.783	5.606	2.8474	2.7585	2.7442	1.5242	1.22	0.0026	-0.003	-0.0843	-0.014	-0.0173	0.0313	-0.0474	-0.0082	0.0556	-0.094	0.0033	0.0907
FPC	5A	160	649.143	Qfpc.tamu.5A.649	IWB68078	647.365	IWB7685	654.088	6B	180	698.557	Qfpc.tamu.6B.699	IWB4109	691.341	IWB535	698.993	6.0211	3.2811	2.74	2.7832	1.6551	1.1281	-0.0176	-0.007	0.0868	-0.0061	0.0083	-0.0021	0.0007	0.0366	-0.0373	0.0881	-0.0007	-0.0874
FPC	3B	70	573.015	Qfpc.tamu.3B.573	IWA5626	572.254	IWB27739	586.143	6D	5	2.43248	Qfpc.tamu.6D.2	IWB55116	2.32151	IWB4286	5.0646	5.727	2.7331	2.9939	2.7488	1.4515	1.2972	-0.0405	0.0379	-0.0817	-0.0012	-0.0206	0.0217	-0.032	0.0497	-0.0177	-0.0933	-0.003	0.0962
FPC	1A	45	41.1236	Qfpc.tamu.1A.41	IWB28624	36.5693	IWB35572	41.9062	6D	15	7.40709	Qfpc.tamu.6D.7	IWB262	7.09848	IWB67933	18.0074	6.3167	3.9411	2.3756	2.9134	2.0206	0.8928	0.0001	-0.0056	-0.096	0.034	-0.019	-0.015	-0.0537	0.0484	0.0053	-0.0246	-0.0607	0.0853
FPC	1A	200	539.763	Qfpc.tamu.1A.540	IWB7289	536.665	IWB50892	540.337	7A	85	67.672	Qfpc.tamu.7A.68	IWB72000	67.6719	IWB21914	67.6721	6.8137	3.859	2.9547	3.1421	1.9087	1.2334	0.0125	-0.0287	-0.0922	0.0081	0.0452	-0.0533	-0.0284	0.0225	0.0059	-0.0936	0.0057	0.0879
FPC	2D	140	397.548	Qfpc.tamu.2D.398	IWB29942	390.704	IWB53040	635.595	7A	150	621.083	Qfpc.tamu.7A.621	IWB10959	617.693	IWB52737	645.092	5.89	3.5263	2.3638	2.9269	1.7413	1.1856	-0.0472	0.0071	-0.0891	-0.0498	0.0245	0.0253	0.0071	-0.0192	0.012	0.0628	-0.1024	0.0395
FPC	2A	255	770.263	Qfpc.tamu.2A.770	IWB11240	767.792	IWB5416	770.358	7A	165	659.682	Qfpc.tamu.7A.660	IWB66071	650.627	IWA614	660.465	7.2212	3.7372	3.484	3.684	2.0259	1.658	-0.0327	0.0133	-0.0952	-0.0237	-0.0053	0.0289	0.0434	-0.027	-0.0164	-0.1126	0.0155	0.0971
FPC	2A	5	9.73222	Qfpc.tamu.2A.10	IWB57879	7.68757	IWB100	10.9931	7D	0	5.08867	Qfpc.tamu.7D.5	IWB72285	5.08867	IWB34246	5.16714	5.5478	3.6051	1.9427	2.7001	1.9408	0.7593	-0.0148	-0.0052	0.0928	0.0296	-0.0119	-0.0176	-0.0067	-0.0451	0.0517	0.0623	0.0156	-0.0779
WAB	1D	15	7.02582	Qwab.tamu.1D.7	IWB6058	0.791411	IWB14030	7.83407	2B	130	755.041	Qwab.tamu.2B.755	IWB34617	753.802	IWA6656	776.979	5.4588	2.9017	2.5571	2.7294	1.4593	1.2701	0.0504	0.02	0.1267	0.0669	-0.0529	-0.0141	-0.0213	-0.0307	0.052	-0.1478	0.1557	-0.0079
WAB	3B	90	696.083	Qwab.tamu.3B.696	IWB9039	683.43	IWB2741	696.729	6A	5	6.30076	Qwab.tamu.6A.6	IWB7815	5.77425	IWB23521	6.72511	6.8843	2.1272	4.757	3.6317	1.0903	2.5414	-0.1896	0.032	-0.1117	0.0983	-0.1632	0.0649	0.0571	-0.016	-0.041	0.2317	-0.172	-0.0597
WAB	5A	125	588.377	Qwab.tamu.5A.588	IWB9678	585.08	IWB46787	590.849	6D	10	4.16642	Qwab.tamu.6D.4	IWB55116	2.32151	IWB4286	5.0646	5.0205	0.8413	4.1792	2.3148	0.3209	1.9938	-0.0009	-0.0166	0.0649	-0.0262	0.0388	-0.0127	-0.054	0.0553	-0.0013	-0.0011	0.1841	-0.183
WAB	2D	140	397.548	Qwab.tamu.2D.398	IWB29942	390.704	IWB53040	635.595	7A	125	266.643	Qwab.tamu.7A.267	IWA7002	266.643	IWB28094	266.646	5.9633	2.3465	3.6168	3.2859	1.2202	2.0658	-0.0232	0.0529	-0.1168	-0.0927	0.0697	0.023	-0.0023	-0.03	0.0323	0.1681	-0.2056	0.0374
WAB	2A	250	762.372	Qwab.tamu.2A.762	IWB56077	760.572	IWB165	763.367	7B	185	735.453	Qwab.tamu.7B.735	IWB22873	733.61	IWB34196	739.931	5.2224	2.4684	2.754	2.4578	1.3482	1.1096	-0.0252	0.046	-0.1236	-0.0165	0.0076	0.0088	-0.0884	0.0438	0.0446	0.1508	-0.0209	-0.1299
WAB	5B	90	531.727	Qwab.tamu.5B.532	IWB44284	531.54	IWA6721	534.323	7D	0	5.08867	Qwab.tamu.7D.5	IWB72285	5.08867	IWB34246	5.16714	5.5568	1.3931	4.1637	3.1465	0.7862	2.3603	-0.0141	0.0205	-0.0917	0.0039	-0.0208	0.0169	0.0109	-0.0854	0.0745	0.2049	-0.2009	-0.004
a MLT, midline left time; MLV, midline left value; MLS, midline left slope; MLW, midline left width; MLI, midline left integral; MPT, midline peak time; MPV, midline peak value; MPW, midline peak width; MPI, midline peak integral; MRT, midline right time; MRV, midline right value; MRS, midline right slope; MRW, midline right width; MRI, midline right integral; MTV, midline trail value; MTS, midli…
b LOD,logarithm of odds; LOD(AA), LOD due to epistasis effects; LOD(AAbyE), LOD due to epistasis-by-environment interction effects
c PVE, phenotypic variance explained; PVE (AA), PVE explained by epistasis effects; PVP(AAbyE), PVE explained by epistasis-by-environment interaction effects
